# Supplementary material
Source: PubMed Central journal article supplement (PMC4210111)

## Supplementary Information for

### Silyl Phosphorus and Nitrogen Donor Chelates for Homogeneous *ortho* Borylation Catalysis

Behnaz Ghaffari,<sup>†</sup> Sean M. Preshlock,<sup>†</sup> Donald L. Plattner,<sup>†</sup> Richard J. Staples,<sup>†</sup> Peter E. Maligres,<sup>‡</sup> Shane W. Kraska,<sup>‡,\*</sup> Robert E. Maleczka, Jr.,<sup>†,\*</sup> Milton R. Smith, III<sup>†,\*</sup>

<sup>†</sup>Department of Chemistry, Michigan State University, East Lansing, Michigan 48824-1322, United States

<sup>‡</sup>Department of Process Chemistry, Merck Research Laboratories, Rahway, New Jersey 07065, United States

#### Table of Contents

|                                                                                                         |     |
|---------------------------------------------------------------------------------------------------------|-----|
| General Methods.....                                                                                    | S2  |
| Synthesis and characterization of (2-(diisopropylsilyl)phenyl)di- <i>p</i> -tolylphosphane (SIPBz)..... | S2  |
| General Procedure for <i>ortho</i> -directed Borylation of methyl benzoates.....                        | S3  |
| Compound Characterization .....                                                                         | S3  |
| Synthesis and characterization of IrCODSiPBz.....                                                       | S19 |
| Synthesis and characterization of 8-(diisopropylsilyl)quinolone (QSi) .....                             | S19 |
| Crystal data for methyl 2,3-dimethoxy-6-(4,4,5,5-tetramethyl-1,3,2-dioxaborolan-2-yl)benzoate(6f).....  | S24 |
| Crystal data for IrCODSiPBz (9).....                                                                    | S34 |
| References.....                                                                                         | S47 |
| <sup>1</sup> H and <sup>13</sup> C NMR.....                                                             | S48 |

**General Methods.** All reactions were conducted in a nitrogen filled glove-box. THF was distilled from sodium benzophenone solutions. All other solvents were used as received from Sigma-Aldrich (Sure/Seal™) and were stored in the glove-box. All other commercially available materials were used as received. <sup>1</sup>H and <sup>13</sup>C NMR spectra were recorded on a Varian VXR-500 or Varian Unity-500-Plus spectrometer (499.74 and 125.67 MHz respectively) and referenced to residual solvent signals. <sup>11</sup>B spectra were recorded on Varian VXR-500 operating at 160.41 MHz respectively.

**(2-(diisopropylsilyl)phenyl)di-*p*-tolylphosphane (SiPBz) (5)**

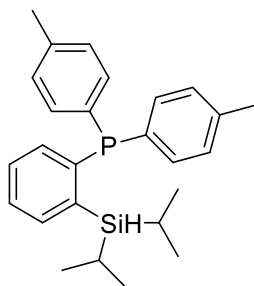

(2-bromophenyl)di-*p*-tolylphosphine was synthesized on 10 mmol scale reaction following a previously reported procedure in 95% (3.507 g) isolated yield (final work up was performed in air).<sup>1</sup> (2-bromophenyl)di-*p*-tolylphosphine (3.507 g, 9.5 mmol) was added to a Schlenk flask containing a magnetic stir bar and kept under gentle stream of nitrogen through the synthesis. Dry diethyl ether (50 mL) was added via syringe, and the flask was cooled to – 78 °C. *n*-BuLi (4.0 mL, 10 mmol, 2.5 M) was added dropwise via syringe and the mixture was allowed to warm to room temperature over 1 h. The reaction mixture was cooled back to – 78 °C, and diisopropylchlorosilane (1.70 mL, 10.0 mmol) was added dropwise over 15 min. The resulting mixture was warmed to reach room temperature and stirred for 4 hours. In a nitrogen-filled glove box, the mixture was then filtered and the precipitate washed with toluene. Volatiles were removed from the filtrate under reduced pressure and the product was isolated as a white solid in 88% (3.840 g) yield. <sup>1</sup>H NMR (500 MHz, C<sub>6</sub>D<sub>6</sub>) δ 1.01 (d, *J* = 7.4 Hz, 6H), 1.17 (d, *J* = 7.3 Hz, 6H), 1.47 (m, 2H), 1.98 (s, 6H), 4.57 (m, 1H), 6.90 (d, *J* = 7.8 Hz, 4H), 7.08-7.02 (m, 2H), 7.31 (d, *J* = 7.8 Hz, 4H), 7.36-7.33 (m, 1H), 7.62-7.58 (m, 1H); <sup>13</sup>C NMR (125 MHz, C<sub>6</sub>D<sub>6</sub>) 12.1 (d, *J* = 6.7 Hz), 19.3 (d, *J* = 10.5 Hz), 21.2, 127.7, 129.1 (d, *J* = 6.7 Hz), 133.6 (d, *J* = 19.1 Hz), 134.0, 134.5 (d, *J* = 10.5 Hz), 136.7 (d, *J* = 15.3 Hz), 138.1, 142.9, 143.2, 144.3 (d, *J* = 10.4 Hz); <sup>31</sup>P

NMR (202 MHz, C<sub>6</sub>D<sub>6</sub>)  $\delta$  -9.82. (s). HRMS (ESI)  $m/z$  calcd for C<sub>26</sub>H<sub>34</sub>PSi [M + H]<sup>+</sup> 405.2167, found 405.2159.

**General procedure for *ortho*-directed borylation of methyl benzoates.** In a nitrogen filled glovebox, [Ir(OMe)(cod)]<sub>2</sub> (8.3 mg, 0.0125 mmol) was dissolved in 1 mL THF in a 15 mL pressure tube containing a magnetic stir bar. To the tube, 1 equiv. B<sub>2</sub>Pin<sub>2</sub> (254.0 mg), SiPBz (0.0250 mmol, 10.0 mg), and 1.0 mmol methyl benzoate substrate were also added, and the reaction vessel was sealed and heated at 80 °C for 16h. The reaction mixture was allowed to return to room temperature and was exposed to air. The volatiles were then removed under reduced pressure and the product was purified by passing it through a short plug of SiO<sub>2</sub> eluting with MTBE. Additional purifications were performed as described below.

#### Methyl 2-(4,4,5,5-tetramethyl-1,3,2-dioxaborolan-2-yl)benzoate (**6a**)

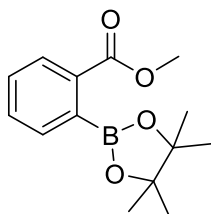

In a glove box, [Ir(OMe)(cod)]<sub>2</sub> (3.3 mg, 0.0050 mmol), SiPBz (0.0100 mmol, 4.0 mg), and anhydrous, degassed THF (1.0 mL) were placed in a 15 mL pressure tube containing a magnetic stir bar, and the mixture was stirred for 1 min at room temperature. Methylbenzoate (276.0 mg, 2.0 mmol) was added to the tube and lastly bis(pinacolato)diboron (254.0 mg, 1.0 mmol) was added as a solid, the reaction vessel was sealed and heated at 60 °C. Reaction progress was monitored by GC over 1 hour intervals. After 3 hours, (100% GC conversion based on B<sub>2</sub>pin<sub>2</sub>) the reaction mixture was allowed to return to room temperature and was exposed to air. The volatiles were then removed under reduced pressure and the product was purified by column chromatography; hexanes: EtOAc (12:1) to hexanes: EtOAc (9:1) as a pale yellow- oil (190.0 mg, 72% yield based on B<sub>2</sub>Pin<sub>2</sub> (5% diborylated product, **6b**, was observed in crude); <sup>1</sup>H NMR (500 MHz, CDCl<sub>3</sub>)  $\delta$  1.42 (s, 12H), 3.91 (s, 3H), 7.42 (dt,  $J$  = 2.5, 8.4 Hz, 1H), 7.53-7.48 (m, 2H), 7.94 (d,  $J$  = 7.8 Hz, 1H).<sup>2</sup>

### Methyl 2,6-bis(4,4,5,5-tetramethyl-1,3,2-dioxaborolan-2-yl)benzoate (6b)

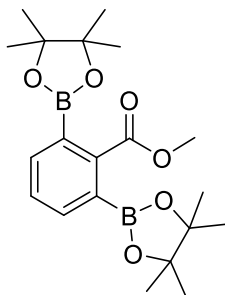

The reaction was performed using 1.0 mmol substrate (126  $\mu$ l),  $[\text{Ir}(\text{OMe})(\text{cod})]_2$   $[\text{Ir}(\text{OMe})(\text{cod})]_2$  (16.6 mg, 0.0250 mmol), 0.5 equiv  $\text{B}_2\text{Pin}_2$  (254.0 mg), SiPBz (0.0500 mmol, 20.0 mg). The product was obtained by recrystallization from MeOH/  $\text{H}_2\text{O}$  as a white solid (244.0 mg, 63% isolated yield);  $^1\text{H}$  NMR (500 MHz,  $\text{CDCl}_3$ )  $\delta$  1.35 (s, 24H), 3.89 (s, 3H), 7.43 (d,  $J = 7.3$  Hz, 1H), 7.70 (d,  $J = 7.4$  Hz, 2H);  $^{13}\text{C}$  NMR (125 MHz,  $\text{CDCl}_3$ )  $\delta$  24.8, 52.0, 84.0, 128.9, 135.4, 141.7, 170.6;  $^{11}\text{B}$  NMR (160 MHz,  $\text{CDCl}_3$ )  $\delta$  31.0 (br s); HRMS (ESI)  $m/z$  calcd for  $\text{C}_{20}\text{H}_{31}\text{B}_2\text{O}_6$   $[\text{M} + \text{H}]^+$  389.2307, found 389.2307.

### Methyl 5-bromo-2-(4,4,5,5-tetramethyl-1,3,2-dioxaborolan-2-yl)benzoate (6c)

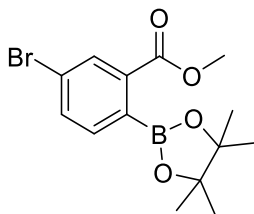

The reaction was performed using 0.5 mmol substrate (107.5 mg),  $[\text{Ir}(\text{OMe})(\text{cod})]_2$  (16.6 mg, 0.0250 mmol), 2 equiv  $\text{B}_2\text{Pin}_2$  (254.0 mg), SiPBz (0.0500 mmol, 20.0 mg). Purified by column chromatography; hexanes: EtOAc (9:1). The product was obtained as yellow oil (139 mg, 60% yield (95% assay yield by  $^1\text{H}$  NMR));  $^1\text{H}$  NMR (500 MHz,  $\text{CDCl}_3$ )  $\delta$  1.40 (s, 12H), 3.91 (s, 3H), 7.37 (d,  $J = 7.8$  Hz, 1H), 7.64 (dd,  $J = 2.0, 7.8$  Hz, 1H), 8.07 (s,  $J = 1.5$  Hz, 1H).<sup>3</sup>

**Methyl 2-methoxy-6-(4,4,5,5-tetramethyl-1,3,2-dioxaborolan-2-yl)benzoate (6d)**

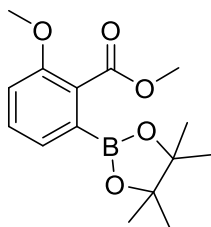

The reaction was performed using 1.0 mmol substrate (166.0 mg),  $[\text{Ir}(\text{OMe})(\text{cod})]_2$  (8.3 mg, 0.0125 mmol), 1.25 equiv  $\text{B}_2\text{Pin}_2$  (317.0 mg), SiPBz (0.0250 mmol, 10.0 mg). The product was obtained by recrystallization from MeOH/ $\text{H}_2\text{O}$  as brown crystals (240.0 mg, 82% yield);  $^1\text{H}$  NMR (500 MHz,  $\text{CDCl}_3$ )  $\delta$  1.32 (s, 12H), 3.83 (s, 3H), 3.88 (s, 3H), 7.02 (d,  $J = 8.3$  Hz, 1H), 7.32 (d,  $J = 6.4$  Hz, 1H), 7.38 (t,  $J = 7.3$  Hz, 1H).<sup>4</sup>

**Methyl 5-methoxy-2-(4,4,5,5-tetramethyl-1,3,2-dioxaborolan-2-yl)benzoate (6e)**

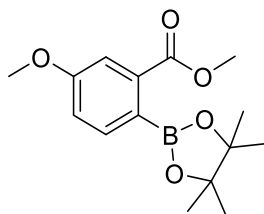

Purified by column chromatography; hexanes: EtOAc (9:1). The product was obtained as yellow oil (193.0 mg, 66% yield) Spectrum contains minor amounts of methyl 3-methoxy-2-(4,4,5,5-tetramethyl-1,3,2-dioxaborolan-2-yl)benzoate  $^1\text{H}$  NMR (500 MHz,  $\text{CDCl}_3$ )  $\delta$  1.39 (s, 12H), 3.83 (s, 3H), 3.89 (s, 3H), 7.05 (dd,  $J = 2.4, 8.3$  Hz, 1H), 7.45-7.42 (m, 2H).<sup>4</sup>

**Methyl 3-methoxy-2,6-bis(4,4,5,5-tetramethyl-1,3,2-dioxaborolan-2-yl)benzoate (6e')**

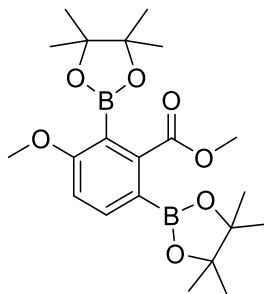

Purified by column chromatography; hexanes: EtOAc (9: 1). The product was obtained as yellow powder (20.0 mg, 5% yield);  $^1\text{H}$  NMR (500 MHz,  $\text{CDCl}_3$ )  $\delta$  1.34 (s, 12H), 1.39 (s, 12H), 3.79 (s, 3H), 3.87 (s, 3H), 6.93 (d,  $J = 8.3$  Hz, 1H), 7.50 (d,  $J = 7.9$  Hz, 1H);  $^{13}\text{C}$  NMR (125 MHz,

CDCl<sub>3</sub>) δ 24.8, 24.9, 52.1, 55.6, 83.6, 83.8, 112.3, 135.4, 139.0, 163.6, 169.3; <sup>11</sup>B NMR (160 MHz, CDCl<sub>3</sub>) δ 31.0 (br, s); HRMS (ESI) m/z calcd for C<sub>21</sub>H<sub>33</sub>B<sub>2</sub>O<sub>7</sub> [M + H]<sup>+</sup> 419.2420, found 419.2434.

**Methyl 2,3-dimethoxy-6-(4,4,5,5-tetramethyl-1,3,2-dioxaborolan-2-yl)benzoate (6f)**

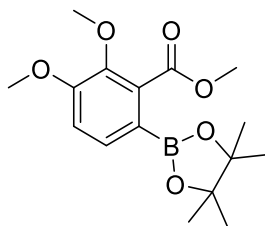

The compound was obtained via recrystallization with MeOH/H<sub>2</sub>O as white crystals (227.0 mg, 70% yield); <sup>1</sup>H NMR (500 MHz, CDCl<sub>3</sub>) δ 1.30 (s, 12H), 3.85 (s, 3H), 3.88 (s, 3H), 3.89 (s, 3H), 6.94 (d, *J* = 8.3 Hz, 1H), 7.51 (d, *J* = 7.8 Hz, 1H); <sup>13</sup>C NMR (125 MHz, CDCl<sub>3</sub>) δ 24.8, 52.2, 55.8, 61.6, 83.8, 112.6, 131.8, 134.6, 145.4, 155.0, 168.7; <sup>11</sup>B NMR (160 MHz, CDCl<sub>3</sub>) δ 30.0 (br, s); HRMS (ESI) m/z calcd for C<sub>16</sub>H<sub>24</sub>BO<sub>6</sub> [M + H]<sup>+</sup> 323.1669, found 323.1677. Structure determination was done by single crystal X-ray diffraction studies.

**Methyl 2-(4,4,5,5-tetramethyl-1,3,2-dioxaborolan-2-yl)-6-(trifluoromethyl)benzoate (6g)**

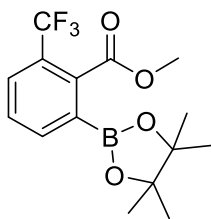

The compound was obtained via recrystallization with MeOH/H<sub>2</sub>O, as black crystals (270.0 mg, 82% yield); <sup>1</sup>H NMR (500 MHz, CDCl<sub>3</sub>) δ 1.34 (s, 12H), 3.92 (s, 3H), 7.55 (t, *J* = 7.8 Hz, 1H), 7.76 (d, *J* = 8.3 Hz, 1H), 7.99 (d, *J* = 7.9, Hz, 1H).<sup>4</sup>

**Methyl 2-(4,4,5,5-tetramethyl-1,3,2-dioxaborolan-2-yl)-5-(trifluoromethyl)benzoate (6h)**

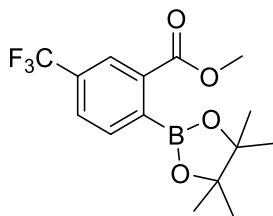

The compound was obtained via recrystallization with MeOH/H<sub>2</sub>O, as brown powder (266.0 mg, 81% yield); <sup>1</sup>H NMR (500 MHz, CDCl<sub>3</sub>) δ 1.42 (s, 12H), 3.95 (s, 3H), 7.62 (d, *J* = 7.8 Hz, 1H), 7.76 (dd, *J* = 1.0, 7.8 Hz, 1H), 8.19 (s, 1H).<sup>4</sup>

**Methyl 2-(4,4,5,5-tetramethyl-1,3,2-dioxaborolan-2-yl)-4-(trifluoromethyl)benzoate (6i)**

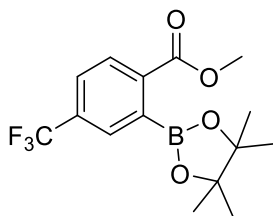

The compound purified by column chromatography; hexanes: EtOAc (9:1), and obtained as yellow oil (163.0 mg, 49% yield); <sup>1</sup>H NMR (500 MHz, CDCl<sub>3</sub>) δ 1.43 (s, 12H), 3.95 (s, 3H), 7.69 (dd, *J* = 7.8, 0.9 Hz, 1H), 7.74 (s, 1H), 8.04 (d, *J* = 8.3 Hz, 1H).<sup>4</sup>

**Methyl 2,6-bis(4,4,5,5-tetramethyl-1,3,2-dioxaborolan-2-yl)-4-(trifluoromethyl)benzoate (6i')**

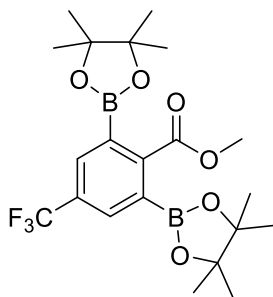

The compound purified by column chromatography; hexanes: EtOAc (9:1), and was obtained as brown crystals (77.0 mg, 17% yield); <sup>1</sup>H NMR (500 MHz, CDCl<sub>3</sub>) δ 1.34 (s, 24H), 3.89 (s, 3H), 7.93 (s, 2H); <sup>13</sup>C NMR (125 MHz, CDCl<sub>3</sub>) δ 24.7, 52.3, 84.5, 124.9 (*J* = 272.7 Hz), 130.7 (*J* = 32.4 Hz), 132.6 (*J* = 3.8 Hz), 145.9, 169.8; <sup>19</sup>F NMR (470 MHz, CDCl<sub>3</sub>) δ -62.8 (s); <sup>11</sup>B NMR

(160 MHz, CDCl<sub>3</sub>)  $\delta$  31.0 (br, s); HRMS (ESI)  $m/z$  calcd for C<sub>21</sub>H<sub>30</sub>B<sub>2</sub>F<sub>3</sub>O<sub>6</sub> [M + H]<sup>+</sup> 457.2188, found 457.2198.

**Methyl 5-methyl-2-(4,4,5,5-tetramethyl-1,3,2-dioxaborolan-2-yl)benzoate (6j)**

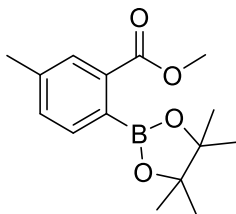

The compound purified by column chromatography; hexanes: EtOAc (9:1) and was obtained as yellow oil (227.0 mg, 82% yield); <sup>1</sup>H NMR (500 MHz, CDCl<sub>3</sub>)  $\delta$  1.42 (s, 12H), 2.38 (s, 3H), 3.91 (s, 3H), 7.34 (d,  $J$  = 7.4 Hz, 1H), 7.41 (d,  $J$  = 7.3 Hz, 1H), 7.76 (s, 1H).<sup>3</sup>

**Methyl 4-methyl-2-(4,4,5,5-tetramethyl-1,3,2-dioxaborolan-2-yl)benzoate (6k)**

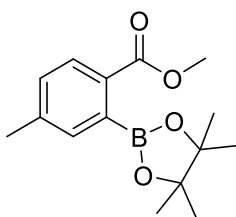

The product was obtained via column chromatography; hexanes: EtOAc (9:1), as white powder (135.0 mg, 49% yield); <sup>1</sup>H NMR (500 MHz, CDCl<sub>3</sub>)  $\delta$  1.43 (s, 12H), 2.38 (s, 3H), 3.90 (s, 3H), 7.22 (dd,  $J$  = 1.0, 7.9 Hz, 1H), 7.29 (s, 1H), 7.85 (d,  $J$  = 7.8 Hz, 1H).<sup>3</sup>

**Methyl 4-methyl-2,6-bis(4,4,5,5-tetramethyl-1,3,2-dioxaborolan-2-yl)benzoate (6k')**

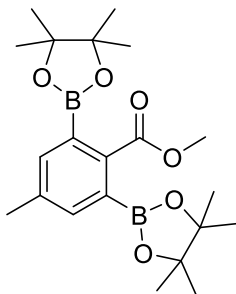

The product was obtained by column chromatography; hexanes: EtOAc (9:1), as brown crystals (54.0 mg, 13% yield); <sup>1</sup>H NMR (500 MHz, CDCl<sub>3</sub>)  $\delta$  1.36 (s, 24H), 2.35 (s, 3H), 3.87 (s, 3H), 7.45 (s, 2H); <sup>13</sup>C NMR (125 MHz, CDCl<sub>3</sub>)  $\delta$  21.2, 24.8, 51.9, 83.9, 135.4, 137.7, 139.3, 170.3;



$^{11}\text{B}$  NMR (160 MHz,  $\text{CDCl}_3$ )  $\delta$  30.0 (br, s); HRMS (ESI)  $m/z$  calcd for  $\text{C}_{21}\text{H}_{33}\text{B}_2\text{O}_6$   $[\text{M} + \text{H}]^+$  403.2471, found 403.2462.

**Reaction was optimized for catalyst loading, temperature and time:**

In a glove box,  $[\text{Ir}(\text{OMe})(\text{cod})]_2$  (3.3 mg, 0.0050 mmol), SiPBz (0.0100 mmol, 4.0 mg), and anhydrous, degassed THF (1.0 mL) were placed in a 15 mL pressure tube containing a magnetic stir bar, and the mixture was stirred for 1 min at room temperature. Methyl 4-methylbenzoate (150.2 mg, 1.0 mmol) was added to the tube and lastly bis(pinacolato)diboron (254.0 mg, 1.0 mmol) was added as solid, the reaction vessel was sealed and heated at 60 °C. Reaction progress was monitored by GC over 1 hour intervals. After 3 hours, (100% GC conversion based on  $\text{B}_2\text{pin}_2$ ) the reaction mixture was allowed to return to room temperature and was exposed to air. The volatiles were then removed under reduced pressure and the product was purified by column chromatography; hexanes: EtOAc (9:1). **6K** and **6K'** were obtained in 55% (152.0 mg) and 10% (41.2 mg) isolated yield.

**Methyl 2-fluoro-6-(4,4,5,5-tetramethyl-1,3,2-dioxaborolan-2-yl)benzoate (6I)**

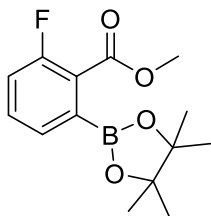

Product was purified by column chromatography; hexanes: EtOAc (9:1) as yellow oil (281.0 mg, 84% yield);  $^1\text{H}$  NMR (500 MHz,  $\text{CDCl}_3$ )  $\delta$  1.36 (s, 12H), 3.92 (s, 3H), 7.16 (m, 1H), 7.46 (m, 2H);  $^{13}\text{C}$  NMR (125 MHz,  $\text{DMSO-d}_6$ )  $\delta$  24.9, 53.0, 84.6, 118.8 ( $J = 21.0$  Hz), 124.9 ( $J = 13.3$  Hz), 130.1 ( $J = 3.8$  Hz), 133.2 ( $J = 8.6$  Hz), 160.3 ( $J = 251.8$  Hz), 166.1;  $^{19}\text{F}$  NMR 470 MHz,  $\text{CDCl}_3$ )  $\delta$  -115.0 (s);  $^{11}\text{B}$  NMR (160 MHz,  $\text{CDCl}_3$ )  $\delta$  31.0 (br, s); HRMS (ESI)  $m/z$  calcd for  $\text{C}_{14}\text{H}_{19}\text{BFO}_4$   $[\text{M} + \text{H}]^+$  281.1363, found 281.1371.

**tert-Butyl 2-(4,4,5,5-tetramethyl-1,3,2-dioxaborolan-2-yl)benzoate (6m)**

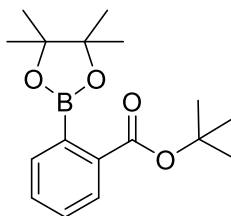

In a glove box,  $[\text{Ir}(\text{OMe})(\text{cod})]_2$  (3.3 mg, 0.0050 mmol), SiPBz (0.0100 mmol, 4.0 mg), and anhydrous, degassed THF (1.0 mL) were placed in a 15 mL pressure tube containing a magnetic stir bar, and the mixture was stirred for 1 min at room temperature. tert-Butyl benzoate (178.2 mg, 1.0 mmol) was added to the tube and lastly bis(pinacolato)diboron (254.0 mg, 1.0 mmol) was added as solid, the reaction vessel was sealed and heated at 80 °C. Reaction progress was monitored by GC over 2 hour intervals. After 16 hours, (80% GC conversion based on  $\text{B}_2\text{pin}_2$ ) the reaction mixture was allowed to return to room temperature and was exposed to air. The volatiles were then removed under reduced pressure and the product was purified by column chromatography; hexanes:  $\text{Et}_2\text{O}$  (4:1) as a white solid (192.0 mg, 63% yield). No diborylated product was observed in crude;  $^1\text{H}$  NMR (500 MHz,  $\text{CDCl}_3$ )  $\delta$  1.42 (s, 12H), 1.58 (s, 9H), 7.34 (m, 1H), 7.43-7.49 (m, 2H), 7.82 (d,  $J = 7.8$  Hz, 1H).<sup>4</sup>

**Methyl 4-bromo-2-fluoro-5-(4,4,5,5-tetramethyl-1,3,2-dioxaborolan-2-yl)benzoate (6n)**

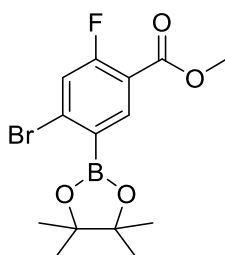

The reaction was performed using 1.0 mmol substrate (233.0 mg),  $[\text{Ir}(\text{OMe})(\text{cod})]_2$  (8.3 mg, 0.0125 mmol), 1 equiv  $\text{B}_2\text{Pin}_2$  (254.0 mg), 4,4'-di-tert-butyl bipyridine (6.7 mg, 0.0250 mmol), 1 mL hexanes. Product was obtained via recrystallization with  $\text{MeOH}/\text{H}_2\text{O}$  as a pale white powder (370 mg, 80% yield) Spectrum contains minor amounts of 4-bromo-2-fluoro-3-(4,4,5,5-tetramethyl-1,3,2-dioxaborolan-2-yl)benzoate;  $^1\text{H}$  NMR (500 MHz,  $\text{CDCl}_3$ )  $\delta$  1.38 (s, 12H), 3.97 (s, 3H), 7.40 (d,  $J = 10.3$  Hz, 1H), 8.23 (d,  $J = 8.3$  Hz, 1H), Aromatic couplings are due to H-F couplings;  $^{13}\text{C}$  NMR (125 MHz,  $\text{CDCl}_3$ )  $\delta$  24.8 ( $J = 10.5$  Hz), 52.4, 84.6, 117.1 ( $J = 8.6$  Hz), 121.8 ( $J = 24.8$  Hz), 133.7 ( $J = 9.5$  Hz), 140.2 ( $J = 1.9$  Hz), 163.6 ( $J = 268$ ), 164.2;  $^{19}\text{F}$  NMR 470

MHz, CDCl<sub>3</sub>)  $\delta$  -104.6 (s); <sup>11</sup>B NMR (160 MHz, CDCl<sub>3</sub>)  $\delta$  30.0 (br, s); HRMS (ESI) *m/z* calcd for C<sub>13</sub>H<sub>14</sub>BBrFO<sub>4</sub> [M - CH<sub>3</sub> + H]<sup>+</sup> 343.0155, found 343.0160.

**Methyl 4-bromo-2-fluoro-6-(4,4,5,5-tetramethyl-1,3,2-dioxaborolan-2-yl)benzoate (6o)**

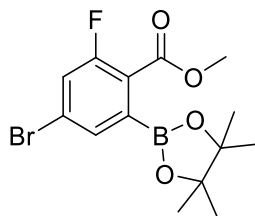

Purified by column chromatography; hexanes: EtOAc (8.5: 1). Yellow Oil (255.0 mg, 70% yield); <sup>1</sup>H NMR (500 MHz, CDCl<sub>3</sub>)  $\delta$  1.38 (s, *J*=0.9 Hz, 12H), 3.93 (s, *J* = 1.5 Hz, 3H), 7.35 (d, *J* = 9.3 Hz, 1H), 7.53 (s, 1H); <sup>13</sup>C NMR (125 MHz, CDCl<sub>3</sub>)  $\delta$  24.7, 52.8, 84.6, 121.4 (*J* = 24.8 Hz), 122.7 (*J* = 12.4 Hz), 126.1 (*J* = 8.6 Hz), 132.0 (*J* = 3.8 Hz), 160.9 (*J* = 261.3 Hz), 166.2; <sup>19</sup>F NMR (470 MHz, CDCl<sub>3</sub>)  $\delta$  -109.7 (s); <sup>11</sup>B NMR (160 MHz, CDCl<sub>3</sub>)  $\delta$  30.0 (br, s); HRMS (ESI) *m/z* calcd for C<sub>13</sub>H<sub>14</sub>BBrFO<sub>4</sub> [M - CH<sub>3</sub> + H]<sup>+</sup> 343.0155, found 343.0150.

***N,N*-Dimethyl-2-(4,4,5,5-tetramethyl-1,3,2-dioxaborolan-2-yl)benzamide (8a)**

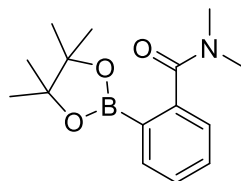

In a glove box, [Ir(OMe)(cod)]<sub>2</sub> (8.3 mg, 0.0125 mmol), SiPBz (0.0250 mmol, 10.0 mg), bis(pinacolato)diboron (254.0 mg, 1 mmol) and anhydrous, degassed THF (4.5 mL) were placed in a 15 mL pressure tube containing a magnetic stir bar, and the mixture was stirred for 1 min at room temperature. *N,N*-Dimethyl benzamide (149.0 mg, 1.0 mmol) was added to the tube, the reaction vessel was sealed and heated at 80 °C. Reaction progress was monitored by GC over 4 hour intervals. After 16 hours, (86% GC conversion) the reaction mixture was allowed to return to room temperature and was exposed to air. The volatiles were then removed under reduced pressure and the product was purified by passing it through a short plug of SiO<sub>2</sub> eluting (hexane/EtOAc = 1/1). The product was isolated by precipitation from hexane. White solid (206.2 mg) in 75% isolated yield. <sup>1</sup>H NMR (500 MHz, CDCl<sub>3</sub>)  $\delta$  1.31 (s, 12H), 2.97 (br s, 6H),

7.30 (dd,  $J = 7.5, 0.6$  Hz, 1H), 7.37 (dt,  $J = 7.5, 1.5$  Hz, 1H), 7.45 (dt,  $J = 7.5, 1.5$  Hz, 1H), 7.80 (dd,  $J = 7.5, 0.6$  Hz, 1H).<sup>4</sup>

**4-chloro-*N,N*-dimethyl-2-(4,4,5,5-tetramethyl-1,3,2-dioxaborolan-2-yl)benzamide (8b)**

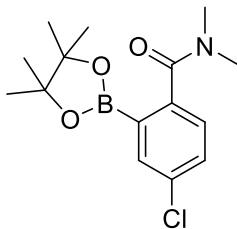

In a glove box, [Ir(OMe)(cod)]<sub>2</sub> (8.3 mg, 0.0125 mmol), SiPBz (0.0250 mmol, 10.0 mg), bis(pinacolato)diboron (254.0 mg, 1.0 mmol) and anhydrous, degassed THF (4.5 mL) were placed in a 15 mL pressure tube containing a magnetic stir bar, and the mixture was stirred for 1 min at room temperature. 4-Chloro *N,N*-dimethyl benzamide (183.6 mg, 1.0 mmol) was added to the tube, the reaction vessel was sealed and heated at 80 °C. Reaction progress was monitored by GC over 4 hour intervals. After 16 hours, 95% conversion was observed. The reaction was stopped and mixture was allowed to return to room temperature and was exposed to air. The volatiles were then removed under reduced pressure and the product was purified by passing it through a short plug of SiO<sub>2</sub> eluting with (hexane/EtOAc = 1/1). The product was isolated by precipitation from hexane. White solid (263.1 mg) in 85% isolated yield was obtained.

<sup>1</sup>H NMR (500 MHz, CDCl<sub>3</sub>) δ ppm 1.31 (s, 12 H) 3.00 (br. s., 6 H) 7.26 (d,  $J=8.3$ , 1 H) 7.40 (d,  $J=8.3$  Hz, 1 H) 7.76 (s, 1 H); <sup>13</sup>C NMR (125 MHz, CDCl<sub>3</sub>) δ ppm 24.9, 83.6, 127.1, 130.6, 134.5, 135.1, 139.7, 171.5; <sup>11</sup>B NMR (160 MHz, CDCl<sub>3</sub>) δ ppm 27.3 (s); HRMS (ESI)  $m/z$  calcd for C<sub>15</sub>H<sub>22</sub>BClNO<sub>3</sub> [M + H]<sup>+</sup> 310.1384, found 310.1386.

**Methyl 4-(dimethylcarbamoyl)-2,5-bis(4,4,5,5-tetramethyl-1,3,2-dioxaborolan-2-yl)benzoate (8c)**

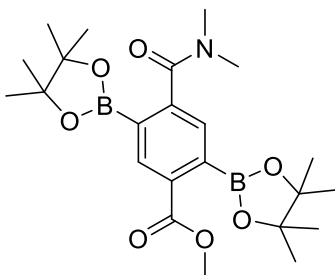

In a glove box,  $[\text{Ir}(\text{OMe})(\text{cod})]_2$  (8.3 mg, 0.0125 mmol), SiPBz (0.0250 mmol, 10.0 mg), bis(pinacolato)diboron (508.0 mg, 2 mmol) and anhydrous, degassed THF (4.5 mL) were placed in a 15 mL pressure tube containing a magnetic stir bar, and the mixture was stirred for 1 min at room temperature. Methyl 4-(dimethylcarbamoyl)benzoate (207.0 mg, 1.0 mmol) was added to the tube, the reaction vessel was sealed and heated at 100 °C. Reaction progress was monitored by GC over 4 hour's intervals. After 16 hours the reaction mixture was allowed to return to room temperature and was exposed to air. The volatiles were then removed under reduced pressure and the product was purified by passing it through a short plug of  $\text{SiO}_2$  eluting with (hexane/EtOAc = 1/1). The product was isolated by precipitation from hexane. White solid (436.0 mg) in 95% isolated yield.  $^1\text{H}$  NMR (500 MHz,  $\text{CDCl}_3$ )  $\delta$  ppm 1.31 (s, 12 H) 1.41 (s, 12 H) 2.75 (br. s., 3 H) 3.09 (br. s., 3 H) 3.93 (s, 3 H) 7.42 (s, 1 H) 8.37 (s, 1 H);  $^{13}\text{C}$  NMR (125 MHz,  $\text{CDCl}_3$ )  $\delta$  ppm 24.8, 24.9, 52.4, 84.0, 84.2, 129.5, 132.8, 135.3, 146.0, 168.0, 171.7;  $^{11}\text{B}$  NMR (160 MHz,  $\text{CDCl}_3$ )  $\delta$  ppm 30.2 (s); HRMS (ESI)  $m/z$  calcd for  $\text{C}_{23}\text{H}_{36}\text{B}_2\text{NO}_7$   $[\text{M} + \text{H}]^+$  460.2686, found 460.2684.

### 2-(2-methoxyphenyl)-4,4,5,5-tetramethyl-1,3,2-dioxaborolane (8d)

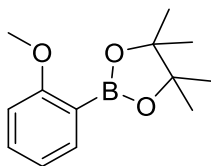

In a glove box,  $[\text{Ir}(\text{OMe})(\text{cod})]_2$  (8.3 mg, 0.0125 mmol), SiPBz (0.0250 mmol, 10.0 mg), bis(pinacolato)diboron (254.0 mg, 1 mmol) and anhydrous, degassed THF (3 mL) were placed in a 15 mL pressure tube containing a magnetic stir bar, and the mixture was stirred for 1 min at room temperature. Anisole (108.0 mg, 1.0 mmol) was added to the tube; the reaction vessel was sealed and heated at 100 °C. Reaction progress was monitored by GC over 4 hour intervals. After 12 hours all of bis(pinacolato)diboron was consumed and no further conversion was observed, the reaction mixture was allowed to return to room temperature and was exposed to air. The volatiles were then removed under reduced pressure and the product was characterized as mixture of 6:1:2 (ortho: meta+para: diborylation) with 55% total GC conversion, (for better

clarity of isomeric ratio on  $^1\text{H NMR}$  of crude material, some starting material was removed under vacuum).<sup>5</sup>

### 2-(2-methoxy-4-methylphenyl)-4,4,5,5-tetramethyl-1,3,2-dioxaborolane (8e)

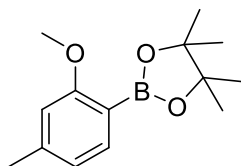

In a glove box,  $[\text{Ir}(\text{OMe})(\text{cod})]_2$  (8.3 mg, 0.0125 mmol), SiPBz (0.0250 mmol, 10.0 mg), bis(pinacolato)diboron (254.0 mg, 1 mmol) and anhydrous degassed THF (3 mL) were placed in a 15 mL pressure tube containing a magnetic stir bar, and the mixture was stirred for 1 min at room temperature. 3-Methyl anisole (122.0 mg, 1.0 mmol) was added to the tube; the reaction vessel was sealed and heated at 100 °C. Reaction progress was monitored by GC over 4 hour intervals. After 12 hours, all bis(pinacolato)diboron was consumed and 46% GC conversion based on substrate and no further was observed (crude mixture contained 7% of the meta isomer). The reaction mixture was allowed to return to room temperature and was exposed to air. The volatiles were then removed under reduced pressure and product was purified by Kugelrohr distillation. The product was isolated as white solid (86.0 mg) in 35 % isolated yield.

$^1\text{H NMR}$  (500 MHz,  $\text{CDCl}_3$ )  $\delta$  ppm 1.32 (s, 12 H) 2.33 (s, 3 H) 3.8 (s, 3 H) 6.65 (s, 1 H) 6.74 (d,  $J=7.4$  Hz, 1 H) 7.55 (d,  $J=7.5$  Hz, 1 H).<sup>6</sup>

### Ethyl 4-methoxy-2-(4,4,5,5-tetramethyl-1,3,2-dioxaborolan-2-yl)benzoate (8f)

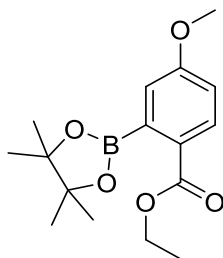

In a glove box,  $[\text{Ir}(\text{OMe})(\text{cod})]_2$  (8.3 mg, 0.0125 mmol), SiPBz (0.0250 mmol, 10.0 mg), bis(pinacolato)diboron (254.0 mg, 1.0 mmol) and anhydrous, degassed *n*-hexane (1 mL) were placed in a 15 mL pressure tube containing a magnetic stir bar, and the mixture was stirred for 1

min at room temperature. Ethyl 4-methoxybenzoate (180.0 mg, 1.0 mmol) was added to the tube, the reaction vessel was sealed and heated at 80 °C, and reaction progress was monitored by GC. After 12 hours 90% conversion was observed and reaction mixture was allowed to return to room temperature and was exposed to air. Purification with column chromatography (gradient from hexane/EtOAc = 9/1 to hexane/EtOAc = 4/1) resulted in ethyl 4-methoxy-2-(4,4,5,5-tetramethyl-1,3,2-dioxaborolan-2-yl)benzoate (226.0 mg) as oil with 77% isolated yield. (5% conversion to ethyl 4-methoxy-2,6-bis(4,4,5,5-tetramethyl-1,3,2-dioxaborolan-2-yl)benzoate was observed by <sup>1</sup>H NMR of the crude reaction mixture and by GC). <sup>1</sup>H NMR (500 MHz, CDCl<sub>3</sub>) δ ppm 1.37 (t, *J*=7.1 Hz, 3H) 1.43 (s, 12 H) 3.86 (s, 3 H) 4.36 (q, *J*=7.3 Hz, 2 H) 6.88 (dd, *J*=8.8, 2.5 Hz, 1 H) 6.95 (d, *J*=2.5 Hz, 1 H) 7.91 (d, *J*=8.8 Hz, 1 H); <sup>13</sup>C NMR (125 MHz, CDCl<sub>3</sub>) δ ppm 14.4, 24.9, 55.4, 60.9, 84.0, 114.1, 116.8, 126.0, 130.7, 162.4, 167.7; <sup>11</sup>B NMR (160 MHz, CDCl<sub>3</sub>) δ ppm 31.1 (s); HRMS (ESI) *m/z* calcd for C<sub>16</sub>H<sub>24</sub>BO<sub>5</sub> [M + H]<sup>+</sup> 307.1720, found 307.1726.

#### **N-Methoxy-N-methyl-2-(4,4,5,5-tetramethyl-1,3,2-dioxaborolan-2-yl)benzamide (8g)**

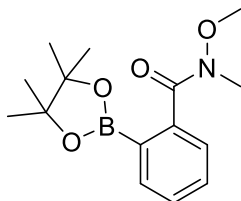

In a glove box, [Ir(OMe)(cod)]<sub>2</sub> (8.3 mg, 0.0125 mmol), SiPBz (0.0250 mmol, 10.0 mg), bis(pinacolato)diboron (254.0 mg, 1.0 mmol) and anhydrous, degassed THF (4.5 mL) were placed in a 15 mL pressure tube containing a magnetic stir bar, and the mixture was stirred for 1 min at room temperature. *N*-Methoxy-*N*-methylbenzamide (165.0 mg, 1.0 mmol) was added to the tube; the reaction vessel was sealed and heated at 80 °C. Reaction progress was monitored by GC over 4 hour intervals. After 12 hours the reaction mixture was allowed to return to room temperature and was exposed to air. The volatiles were then removed under reduced pressure and the product was purified by silica column chromatography (gradient from CHCl<sub>3</sub> to 2% MeOH: 98% CHCl<sub>3</sub>). Colorless viscose oil (244.4 mg) was obtained in 84% isolated yield.

<sup>1</sup>H NMR (500 MHz, CDCl<sub>3</sub>) δ ppm 1.32 (s, 12 H) 3.34 (br. s., 3 H) 3.50 (br. s., 3 H) 7.38 - 7.46 (m, 2 H) 7.49 - 7.55 (m, 1 H) 7.72 - 7.77 (m, 1 H); <sup>13</sup>C NMR (125 MHz, CDCl<sub>3</sub>) δ ppm 25.0, 34.03, 61.0, 83.32, 126.5, 128.0, 128.1, 128.7, 129.5, 130.03, 130.6, 132.2, 133.6 (br);

(Presumably, due to interaction of NOME group with pinacol group some peaks in  $^1\text{H}$ NMR and  $^{13}\text{C}$ NMR are broad).  $^{11}\text{B}$  NMR (160 MHz,  $\text{CDCl}_3$ )  $\delta$  ppm 27.8 (br,s) ; HRMS (ESI)  $m/z$  calcd for  $\text{C}_{15}\text{H}_{23}\text{BNO}_4$   $[\text{M} + \text{H}]^+$  292.1723, found 292.1728.

### Methyl 3-(4,4,5,5-tetramethyl-1,3,2-dioxaborolan-2-yl)thiophene-2-carboxylate (8h)

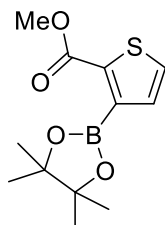

In a glove box,  $[\text{Ir}(\text{OMe})(\text{cod})]_2$  (8.3 mg, 0.0125 mmol), SiPBz (0.0250 mmol, 10.0 mg), bis(pinacolato)diboron (254.0 mg, 1.0 mmol) and anhydrous, degassed *n*-hexane (2 mL) were placed in a 15 mL pressure tube containing a magnetic stir bar, and the mixture was stirred for 1 min at room temperature. Thiophene-2-carboxylic acid methyl ester (142.0 mg, 1.0 mmol) was added to the tube; the reaction vessel was sealed and heated at 80 °C. Reaction progress was monitored by GC over 1 h interval. After 1h, the reaction mixture was allowed to return to room temperature and was exposed to air. 85% GC conversion was observed (ratio 3 position: 5 position: diborylated: 14:1:1). The volatiles were then removed under reduced pressure and Kugelrohr distillation resulted in a white solid (174.2 mg) in 65% isolated yield.  $^1\text{H}$  NMR (500 MHz,  $\text{CDCl}_3$ )  $\delta$  1.42 (s, 12H), 3.9 (s, 3H), 7.19 (d,  $J = 4.9$  Hz, 1H), 7.5 (d,  $J = 4.9$  Hz, 1H).<sup>7</sup>

### Methyl 2-(4,4,5,5-tetramethyl-1,3,2-dioxaborolan-2-yl)-1-naphthoate (8i)

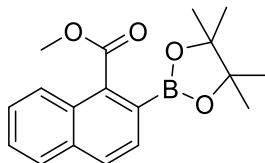

In a glove box,  $[\text{Ir}(\text{OMe})(\text{cod})]_2$  (8.3 mg, 0.0125 mmol), SiPBz (0.025 mmol, 10.0 mg), bis(pinacolato)diboron (254.0 mg, 1.0 mmol) and anhydrous, degassed *n*-hexane (1 mL) were placed in a 15 mL pressure tube containing a magnetic stir bar, and the mixture was stirred for 1 min at room temperature. Methyl 1-naphthoate (186.0 mg, 1.0 mmol) was added to the tube, the reaction vessel was sealed and heated at 80 °C, Reaction progress was monitored by GC. After 8h full conversion was observed and the reaction mixture was allowed to return to room temperature and was exposed to air. Purification with column chromatography (dichloromethane)



resulted in colorless oil (265.0 mg) in 85% isolated yield.  $^1\text{H}$  NMR (500 MHz,  $\text{CDCl}_3$ )  $\delta$  ppm 1.39 (s, 12 H) 4.03 (s, 3 H) 7.50 - 7.58 (m, 2 H), 7.78 (d,  $J=8.3$  Hz, 1 H) 7.83 - 7.89 (m, 1 H) 7.9 (d,  $J=8.3$  Hz, 1 H) 8.1 (d,  $J=8.3$  Hz, 1 H);  $^{13}\text{C}$  NMR (125 MHz,  $\text{CDCl}_3$ )  $\delta$  ppm 24.9, 52.4, 84.2, 125.5, 127.0, 127.0, 128.1, 129.4, 129.5, 134.4, 137.0, 170.5;  $^1\text{H}$  NMR (500 MHz,  $\text{C}_6\text{D}_6$ )  $\delta$  ppm 1.12 (s, 12 H) 3.77 (s, 3 H) 7.17 - 7.21 (m, 1 H) 7.25 (ddd,  $J=8.3, 6.9, 1.5$  Hz, 1 H) 7.51 (d,  $J=8.3$  Hz, 1 H) 7.59 (d,  $J=7.8$  Hz, 1 H) 8.01 (d,  $J=8.3$  Hz, 1 H) 8.35 (d,  $J=8.3$  Hz, 1 H);  $^{13}\text{C}$  NMR (125 MHz  $\text{C}_6\text{D}_6$ )  $\delta$  ppm 24.5, 51.6, 83.7, 125.7, 126.8, 126.9, 128.1, 129.1, 129.8, 129.9, 134.7, 138.4, 169.7;  $^{11}\text{B}$  NMR (160 MHz,  $\text{CDCl}_3$ )  $\delta$  ppm 31.1 (s); HRMS (ESI)  $m/z$  calcd for  $\text{C}_{18}\text{H}_{22}\text{BO}_4$  [ $\text{M} + \text{H}$ ] $^+$  313.1614, found 313.1612.

### 2-(2-(4,4,5,5-tetramethyl-1,3,2-dioxaborolan-2-yl)phenyl)pyridine (8j)

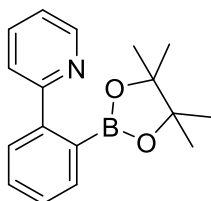

In a glove box,  $[\text{Ir}(\text{OMe})(\text{cod})]_2$  (8.3 mg, 0.0125 mmol), SiPBz (0.0250 mmol, 10.0 mg), bis(pinacolato)diboron (254.0 mg, 1.0 mmol) and anhydrous, degassed THF (2 mL) were placed in a 15 mL pressure tube containing a magnetic stir bar, and the mixture was stirred for 1 min at room temperature. 2-Phenyl pyridine (202.0 mg, 1.3 mmol) was added to the tube, the reaction vessel was sealed and heated at 60  $^\circ\text{C}$ , and reaction progress was monitored by GC. After 2h the reaction mixture was allowed to return to room temperature and was exposed to air. After removal of solvent, purification using silica column chromatography (hexane/EtOAc = 1/3) resulted in a white solid (182 mg) 65% isolated yield. (15% of diborylated material was observed in crude reaction mixture by GC, which was characterized as **8j'** by independent synthesis, see below).  $^1\text{H}$  NMR (500 MHz,  $\text{CDCl}_3$ )  $\delta$  ppm 1.45 (s, 12H), 7.27–7.44 (m, 3H), 7.68 (d,  $J = 7.8$  Hz, 1H), 7.75 (d,  $J = 7.3$  Hz, 1H), 7.83 (d,  $J = 8.3$  Hz, 1H), 7.99 (td,  $J = 7.8, 1.5$  Hz, 1H), 8.70 (d,  $J = 5.4$  Hz, 1H).<sup>8</sup>

## 2-(2,6-bis(4,4,5,5-tetramethyl-1,3,2-dioxaborolan-2-yl)phenyl)pyridine (8j')

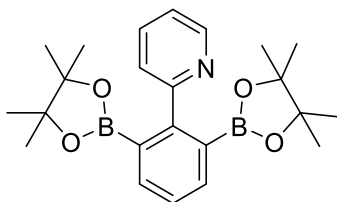

In a glove box,  $[\text{Ir}(\text{OMe})(\text{cod})_2]$  (8.3 mg, 0.0125 mmol), SiPBz (0.0250 mmol, 10.0 mg), bis(pinacolato)diboron (508.0 mg, 2.0 mmol) and anhydrous, degassed THF (2 mL) were placed in a 15 mL pressure tube containing a magnetic stir bar, and the mixture was stirred for 1 min at room temperature. 2-phenyl pyridine (155.2 mg, 1.0 mmol) was added to the tube, the reaction vessel was sealed and heated at 60 °C, and reaction progress was monitored by GC. After 24 hours the reaction mixture was allowed to return to room temperature and was exposed to air. Solvent was removed under reduced pressure. Upon addition of hexane to the mixture white solid precipitate. White solid (264.4 mg) with 65 % isolated yield (15% of monoborylated material was observed in GC of crude reaction mixture).  $^1\text{H}$  NMR (500 MHz,  $\text{CDCl}_3$ )  $\delta$  ppm 1.42 (s, 24 H) 7.37 (m, 2 H) 7.79 (d,  $J=7.34$  Hz, 2 H) 7.91 - 7.96 (t,  $J=7.83$  Hz, 1 H) 8.68 (d,  $J=5.4$  Hz, 1 H) 8.81 (d,  $J=7.8$  Hz, 1 H);  $^{13}\text{C}$  NMR (125 MHz,  $\text{CDCl}_3$ )  $\delta$  ppm 26.1, 82.0, 121.6, 122.4, 129.9, 134.9, 141.6, 142.6, 157.7;  $^{11}\text{B}$  NMR (160 MHz,  $\text{CDCl}_3$ )  $\delta$  ppm 21.6 (s); HRMS (ESI)  $m/z$  calcd for  $\text{C}_{23}\text{H}_{32}\text{B}_2\text{NO}_4$   $[\text{M} + \text{H}]^+$  408.2517, found 408.2526

### Borylation of Chlorobenzene

In a glove box,  $[\text{Ir}(\text{OMe})(\text{cod})_2]$  (8.3 mg, 0.0125 mmol), SiPBz (0.0250 mmol, 10.0 mg), bis(pinacolato)diboron (127.0 mg, 0.5 mmol) and anhydrous, degassed THF (1 mL) were placed in a 15 mL pressure tube containing a magnetic stir bar, and the mixture was stirred for 1 min at room temperature. Chlorobenzene (56.0 mg, 0.5 mmol) was added to the tube; the reaction vessel was sealed and heated at 80 °C. The reaction was stopped after 16 hours, and the mixture was allowed to return to room temperature and was exposed to air. The volatiles were then removed under reduced pressure and the product was characterized as mixture of isomers, with ortho: (meta+para) being 1:3 after 55% conversion.

### IrCODSiPBz (9)

In a nitrogen filled glove box, [Ir(OMe)(cod)]<sub>2</sub> (100.0 mg, 0.151 mmol) was fully dissolved in a minimum amount of *n*-hexane (30 mL) in a 100 mL flask, SiPBz (121.0 mg, 0.302 mmol) was added to the flask as a solid. Upon addition of SiPBz, the solution turned a deep red color. After 15 minutes, <sup>31</sup>P NMR showed full consumption of free phosphine. Then the solvent was fully removed under vacuum and the crude was dissolved in a minimal amount of pentane and stored in a -30 °C freezer. Dark red crystals were obtained after 2 days (100.1 mg, 47% isolated yield).

Structure determination was made by single crystal X-ray diffraction studies. <sup>1</sup>H NMR (500 MHz, C<sub>4</sub>D<sub>8</sub>O, d<sub>8</sub>-THF) δ ppm 0.97 (d, *J*=7.4 Hz, 6 H), 1.02 (d, *J*=7.4 Hz, 6 H), 1.55 - 1.63 (m, 2 H), 1.63 - 1.70 (m, 2 H), 1.75 - 1.85 (m, 2 H), 1.97 - 2.07 (m, 2 H), 2.07 - 2.18 (m, 2 H), 2.26 - 2.40 (s, 6 H), 3.77 (m, 2 H), 5.38 (m, 2 H), 7.10 - 7.23 (m, 5 H), 7.28 (td, *J*=7.24, 1.77 Hz, 1 H), 7.38 - 7.53 (m, 5 H), 7.71 (d, *J*=7.1 Hz, 1 H); <sup>13</sup>C NMR (125 MHz, C<sub>4</sub>D<sub>8</sub>O, d<sub>8</sub>-THF) δ ppm 19.7, 21.2 (d, *J*=2.8 Hz), 21.5 (d, *J*=2.3 Hz), 30.3 (d, *J*=2.9 Hz), 34.3 (d, *J*=2.9 Hz), 77.7 (d, *J*=12.4 Hz), 81.3, 129.2, 129.3, 129.76, 129.84, 130.1, 132.3 (d, *J*=5.7 Hz), 133.6, 133.9, 134.2, 134.3, 135.2 (d, *J*=22.7 Hz), 140.69, 140.71, 148.6, 157.2, 157.6; <sup>31</sup>P NMR (202 MHz, C<sub>4</sub>D<sub>8</sub>O, d<sub>8</sub>-THF) δ ppm 52.8 (s)

### 8-(diisopropylsilyl)quinolone (QSi) (10)

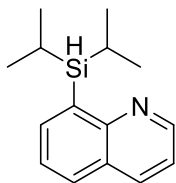

*sec*-Butyllithium (1.3 M in cyclohexane, 7.25 mL, 9.45 mmol) was added dropwise *via* syringe to a magnetically stirred solution of 8-bromoquinoline (1.955 g, 9.4 mmol) in 35.00 mL of Tetrahydrofuran at -78°C over 5 min, followed by stirring for an additional 15 min at this temperature. Diisopropylchlorosilane (1.59 mL, 9.3 mmol), was then added dropwise *via* syringe over 10 min, and the resulting mixture was allowed to warm to ambient temperature over 2 h. After removal of the solvent and volatiles, the crude mixture was subjected to silica column using hexane. Product was obtained as colorless liquid (1.970 g), in 87% yield. <sup>1</sup>H NMR (500 MHz, C<sub>6</sub>D<sub>6</sub>) δ ppm 1.14 (d, *J*=7.3 Hz, 6 H), 1.30 (d, *J*=7.3 Hz, 6 H) 1.82 (m, 2 H) 4.50 (t, *J*=3.9

Hz, 1 H) 6.75 (dd,  $J=8.3, 3.9$  Hz, 1 H) 7.23 (dd,  $J=8.1, 6.6$  Hz, 1 H) 7.42 (dd,  $J=8.3, 1.5$  Hz, 1 H) 7.52 (dd,  $J=8.3, 2.0$  Hz, 1 H) 8.02 (dd,  $J=6.8, 1.5$  Hz, 1 H) 8.67 (dd,  $J=4.4, 2.0$  Hz, 1 H);  $^{13}\text{C}$  NMR (125 MHz,  $\text{C}_6\text{D}_6$ )  $\delta$  ppm 12.7, 20.17, 20.22, 121.3, 126.7, 129.9, 136.4, 138.9, 139.7, 149.9, 153.4; HRMS (ESI)  $m/z$  calcd for  $\text{C}_{15}\text{H}_{22}\text{NSi}$   $[\text{M} + \text{H}]^+$  244.1521, found 244.1527.

### 5-chloro-2-(4,4,5,5-tetramethyl-1,3,2-dioxaborolan-2-yl)phenyl dimethylcarbamate (12a)

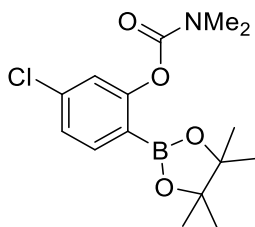

In a glove box,  $[\text{Ir}(\text{OMe})(\text{cod})]_2$  (8.3 mg, 0.0125 mmol), QSi (0.0250 mmol, 6.1 mg), bis(pinacolato)diboron (254.0 mg, 1.0 mmol) and anhydrous, degassed THF (1 mL) were placed in a 15 mL pressure tube containing a magnetic stir bar, and the mixture was stirred for 1 min at room temperature. 3-Chlorophenyl dimethylcarbamate (200.0 mg, 1.0 mmol) was added to the tube; the reaction vessel was sealed and heated at 80 °C. Reaction progress was monitored by GC. After 4h, 93% conversion was observed and the reaction mixture was allowed to return to room temperature and was exposed to air. Purification with column chromatography (gradient from dichloromethane to dichloromethane/EtOAc, 98/2) resulted in pale yellow oil (195.0 mg) with 60% isolated yield.

$^1\text{H}$  NMR (500 MHz,  $\text{CDCl}_3$ )  $\delta$  ppm 1.30 (s, 12 H) 3.00 (s, 3 H) 3.12 (s, 3 H) 7.11 (d,  $J=1.5$  Hz, 1 H) 7.18 (dd,  $J=7.8, 2.0$  Hz, 1 H) 7.69 (d,  $J=8.3$  Hz, 1 H);  $^{13}\text{C}$  NMR (125 MHz,  $\text{CDCl}_3$ )  $\delta$  ppm 24.9, 36.5, 36.7, 83.6, 122.8, 125.2, 137.0, 137.6, 155.1, 156.8;  $^{11}\text{B}$  NMR (160 MHz,  $\text{CDCl}_3$ )  $\delta$  30.0 (br, s); HRMS (ESI)  $m/z$  calcd for  $\text{C}_{15}\text{H}_{22}\text{BClNO}_4$   $[\text{M} + \text{H}]^+$  326.1333 found 326.1324.

### Method B

The reaction was performed using 0.5 mmol substrate (99.5 mg),  $[\text{Ir}(\text{OMe})(\text{cod})]_2$  (8.3 mg, 0.0125 mmol), 2 equiv  $\text{B}_2\text{Pin}_2$  (254.0 mg), SiPBz (0.0250 mmol, 10.0 mg) (5.0 mol %), 1.5 ml THF. Purified by column chromatography; hexanes: EtOAc (8.5:1) using Alizarin as an indicator. The compound was isolated as a clear gel (26.0 mg, 12 % yield).

### 1-(2-(4,4,5,5-tetramethyl-1,3,2-dioxaborolan-2-yl)phenyl)propan-1-one (12b)

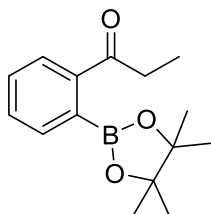

In a glove box,  $[\text{Ir}(\text{OMe})(\text{cod})]_2$  (8.3 mg, 0.0125 mmol), QSi (0.0250 mmol, 6.1 mg), bis(pinacolato)diboron (254.0 mg, 1 mmol) and anhydrous, degassed THF (1 mL) were placed in a 15 mL pressure tube containing a magnetic stir bar, and the mixture was stirred for 1 min at room temperature. propiophenone (134.0 mg, 1.0 mmol) was added to the tube, the reaction vessel was sealed and heated at 80 °C. Reaction progress was monitored by GC. After 1h the reaction mixture was allowed to return to room temperature and was exposed to air (82% GC conversion). Purification with column chromatography (hexane/EtOAc) resulted in a white solid (182.2 mg) with 70% isolated yield (NMR shows 3% starting material).

$^1\text{H}$  NMR (500 MHz,  $\text{CDCl}_3$ )  $\delta$  ppm 1.24 (t,  $J=7.3$  Hz, 3 H) 1.45 (s, 12 H) 3.01 (q,  $J=7.3$  Hz, 2 H) 7.43 (ddd,  $J=7.9, 5.3, 2.9$  Hz, 1 H) 7.52 - 7.55 (m, 2 H) 7.82 (d,  $J=7.8$  Hz, 1 H).<sup>9</sup>

### Borylation of anisole using QSi (10)

In a glove box,  $[\text{Ir}(\text{OMe})(\text{cod})]_2$  (8.3 mg, 0.0125 mmol), QSi (0.0250 mmol, 6.1 mg), and anhydrous, degassed THF (3 mL) were placed in a 15 mL pressure tube containing a magnetic stir bar, and the mixture was stirred for 1 min at room temperature. Anisole (108.0 mg, 1.0 mmol) was added to the tube and lastly, bis(pinacolato)diboron (254.0 mg, 1.0 mmol) was added as a solid; the reaction vessel was sealed and heated at 80 °C. Reaction progress was monitored by GC over 4 hour intervals. After 12 hours no further conversion was observed, the reaction mixture was allowed to return to room temperature and was exposed to air. The volatiles were then removed under reduced pressure and the product was characterized as mixture of 1.6:4.2:1.0 (ortho: meta+para: diborylation) with 40% total GC conversion.

### Borylation of tert-Butyl benzoate using QSi (10)



In a glove box,  $[\text{Ir}(\text{OMe})(\text{cod})]_2$  (3.3 mg, 0.0050 mmol), QSi (0.0100 mmol, 3.0 mg), and anhydrous, degassed THF (1.0 mL) were placed in a 15 mL pressure tube containing a magnetic stir bar, and the mixture was stirred for 1 min at room temperature. tert-Butyl benzoate (178.2 mg, 1.0 mmol) was added to the tube and lastly bis(pinacolato)diboron (254.0 mg, 1.0 mmol) was added as a solid, the reaction vessel was sealed and heated at 80 °C. Reaction progress was monitored by GC over 1 hour intervals. After 3 hours, (91% GC conversion based on benzoate) the reaction mixture was allowed to return to room temperature and was exposed to air. The volatiles were then removed under reduced pressure and the product was purified by column chromatography; hexanes: Et<sub>2</sub>O (4:1) to afford a white solid (238.0 mg, 78% yield). No diborylated product was observed in the crude reaction; <sup>1</sup>H NMR was identical to the previous report.<sup>4</sup>

### Borylation of N,N-dimethylbenzamide using QSi (10)

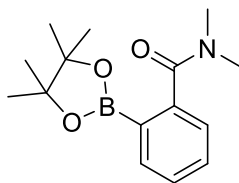

In a glove box,  $[\text{Ir}(\text{OMe})(\text{cod})]_2$  (8.3 mg, 0.0125 mmol), SiPBz (0.0250 mmol, 10.0 mg), bis(pinacolato)diboron (254.0 mg, 1.0 mmol) and anhydrous, degassed THF (4.5 mL) were placed in a 15 mL pressure tube containing a magnetic stir bar, and the mixture was stirred for 1 min at room temperature. N,N-Dimethyl benzamide (149.0 mg, 1.0 mmol) was added to the tube, the reaction vessel was sealed and heated at 80 °C. Reaction progress was monitored by GC over 1 hour intervals. After 4 hours, (90% GC conversion) the reaction mixture was allowed to return to room temperature and was exposed to air. The volatiles were then removed under reduced

pressure and the product was purified by passing it through a short plug of SiO<sub>2</sub> eluting (hexane/EtOAc = 1/1). The product was isolated by precipitation from hexane. A white solid (220.2 mg) was isolated in 80% yield. <sup>1</sup>H NMR was identical to the previous report.<sup>4</sup>

### Borylation of benzamides (7a and 8a) and benzoates (7f and tert-butyl benzoate) using QSi (10) vs SiPbz (5)

Reactions were performed under identical conditions as described for analogues reaction using SiPbz (5).

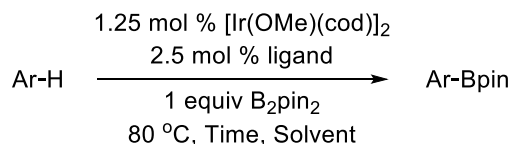

| Entry          | Substrate                                                                           | Product                                                                             | Ligand | Solvent | Time (h) | % yield         |
|----------------|-------------------------------------------------------------------------------------|-------------------------------------------------------------------------------------|--------|---------|----------|-----------------|
| 1              | 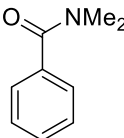  |   | SiPbz  | THF     | 16       | 75              |
|                |                                                                                     |                                                                                     | QSi    | THF     | 4        | 80              |
| 2              |  |  | SiPbz  | THF     | 16       | 85              |
|                |                                                                                     |                                                                                     | QSi    | THF     | 2        | 85              |
| 3              |  |  | SiPbz  | Hex     | 12       | 77 <sup>a</sup> |
|                |                                                                                     |                                                                                     | QSi    | Hex     | 2        | 75 <sup>b</sup> |
| 4 <sup>c</sup> |  |  | SiPbz  | THF     | 16       | 63              |
|                |                                                                                     |                                                                                     | QSi    | THF     | 3        | 78              |

<sup>a</sup>5% diborylation was obtained. <sup>b</sup>15% diborylation was obtained. <sup>c</sup>0.5 mol % [Ir(OMe)(cod)]<sub>2</sub> and 1.0 mol % ligand was used.

**Figure 1. Methyl 2,3-dimethoxy-6-(4,4,5,5-tetramethyl-1,3,2-dioxaborolan-2-yl)benzoate (6f)**

The following are 50% thermal ellipsoidal drawings of the molecule in the asymmetric cell with various amount of labeling.

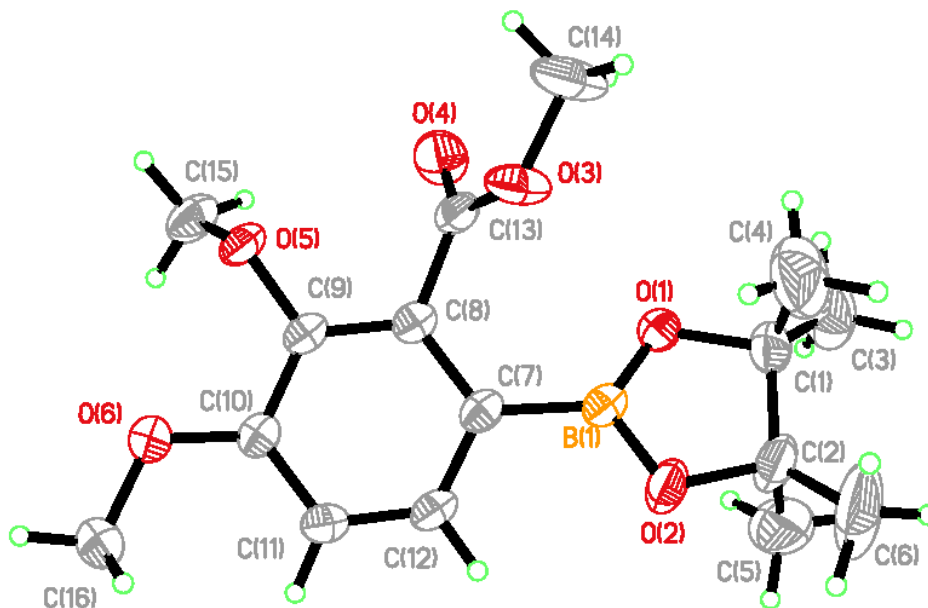

**Table 1 Crystal data and structure refinement for 6f**

|                   |                                                  |
|-------------------|--------------------------------------------------|
| Empirical formula | C <sub>16</sub> H <sub>23</sub> O <sub>6</sub> B |
| Formula weight    | 322.15                                           |
| Temperature/K     | 172.99                                           |
| Crystal system    | monoclinic                                       |
| Space group       | C2/c                                             |
| a/Å               | 23.4123(4)                                       |



|                                          |                                                   |
|------------------------------------------|---------------------------------------------------|
| b/Å                                      | 9.0701(2)                                         |
| c/Å                                      | 18.5703(3)                                        |
| $\alpha$ /°                              | 90                                                |
| $\beta$ /°                               | 118.6010(10)                                      |
| $\gamma$ /°                              | 90                                                |
| Volume/Å <sup>3</sup>                    | 3462.24(12)                                       |
| Z                                        | 8                                                 |
| $\rho_{\text{calc}}$ /mg/mm <sup>3</sup> | 1.236                                             |
| m/mm <sup>-1</sup>                       | 0.767                                             |
| F(000)                                   | 1376.0                                            |
| Crystal size/mm <sup>3</sup>             | 0.427 × 0.31 × 0.194                              |
| Radiation                                | CuK $\alpha$ ( $\lambda$ = 1.54178)               |
| 2 $\Theta$ range for data collection     | 8.604 to 144.228°                                 |
| Index ranges                             | -27 ≤ h ≤ 28, -11 ≤ k ≤ 10, -22 ≤ l ≤ 22          |
| Reflections collected                    | 15915                                             |
| Independent reflections                  | 3362[R(int) = 0.0246]                             |
| Data/restraints/parameters               | 3362/0/215                                        |
| Goodness-of-fit on F <sup>2</sup>        | 1.075                                             |
| Final R indexes [I >= 2 $\sigma$ (I)]    | R <sub>1</sub> = 0.0663, wR <sub>2</sub> = 0.1903 |

Final R indexes [all data]  $R_1 = 0.0701$ ,  $wR_2 = 0.1943$

Largest diff. peak/hole /  $e \text{ \AA}^{-3}$  0.86/-0.43

**Table 2 Fractional Atomic Coordinates ( $\times 10^4$ ) and Equivalent Isotropic Displacement Parameters ( $\text{\AA}^2 \times 10^3$ ) for 6f.  $U_{\text{eq}}$  is defined as 1/3 of of the trace of the orthogonalised  $U_{ij}$  tensor.**

| Atom | <i>x</i>   | <i>y</i>   | <i>z</i>   | $U(\text{eq})$ |
|------|------------|------------|------------|----------------|
| O1   | 1320.0(8)  | 1095.9(17) | 6643.7(9)  | 38.1(4)        |
| O2   | 1459.9(10) | 2890.2(18) | 7567.6(9)  | 47.8(5)        |
| O3   | 2101.8(8)  | 2235(2)    | 5836.4(11) | 46.6(5)        |
| O4   | 1224.7(10) | 1693.5(19) | 4651.8(10) | 52.0(5)        |
| O5   | 1220.9(7)  | 4947.1(17) | 4302.8(9)  | 34.4(4)        |
| O6   | 629.6(8)   | 7349.4(18) | 4500.2(10) | 39.6(4)        |
| C1   | 1640.2(15) | 389(3)     | 7450.6(15) | 51.4(7)        |
| C2   | 1551.7(18) | 1496(3)    | 7999.4(16) | 58.0(8)        |
| C3   | 1396(2)    | -1110(3)   | 7399(2)    | 82.6(12)       |
| C4   | 2376.1(19) | 351(6)     | 7696(3)    | 95.8(14)       |
| C5   | 866(2)     | 1211(5)    | 7959(3)    | 92.4(14)       |
| C6   | 2017(3)    | 1671(5)    | 8859(2)    | 127(2)         |
| C7   | 1093.9(9)  | 3801(2)    | 6122.0(12) | 29.0(4)        |

|     |            |         |            |         |
|-----|------------|---------|------------|---------|
| C8  | 1197.3(9)  | 3763(2) | 5433.9(12) | 27.4(4) |
| C9  | 1040.6(9)  | 4956(2) | 4908.8(11) | 28.1(4) |
| C10 | 756.6(10)  | 6226(2) | 5038.0(12) | 30.2(5) |
| C11 | 634(1)     | 6257(2) | 5700.4(13) | 32.5(5) |
| C12 | 811(1)     | 5069(2) | 6230.7(12) | 32.0(5) |
| C13 | 1492.2(11) | 2450(2) | 5249.7(12) | 32.2(5) |
| C14 | 2422.7(16) | 943(4)  | 5740(2)    | 68.7(9) |
| C15 | 695.6(13)  | 4716(3) | 3490.8(14) | 47.4(6) |
| C16 | 415.4(12)  | 8711(3) | 4679.4(15) | 42.5(6) |
| B1  | 1300.4(11) | 2552(3) | 6779.6(14) | 30.8(5) |

**Table 3 Anisotropic Displacement Parameters ( $\text{\AA}^2 \times 10^3$ ) for 6f. The Anisotropic displacement factor exponent takes the form:  $-2\pi^2[h^2a^{*2}U_{11}+\dots+2hka \times b \times U_{12}]$**

| Atom | $U_{11}$ | $U_{22}$ | $U_{33}$ | $U_{23}$ | $U_{13}$ | $U_{12}$ |
|------|----------|----------|----------|----------|----------|----------|
| O1   | 46.4(9)  | 39.6(9)  | 25.7(7)  | 0.5(6)   | 15.0(7)  | 9.8(7)   |
| O2   | 81.7(13) | 33.6(9)  | 27.2(8)  | 1.2(6)   | 25.3(8)  | -4.1(8)  |
| O3   | 33.7(8)  | 56.0(11) | 50.7(10) | -14.4(8) | 20.7(8)  | 9.6(7)   |
| O4   | 70.0(12) | 38.0(9)  | 38.6(9)  | -11.7(7) | 18.3(9)  | -1.9(8)  |
| O5   | 38.7(8)  | 43.6(9)  | 29.2(7)  | 1.0(6)   | 22.9(7)  | 0.4(6)   |

|     |          |          |          |           |          |          |
|-----|----------|----------|----------|-----------|----------|----------|
| O6  | 52.6(10) | 35.4(8)  | 37.3(8)  | 5.6(6)    | 26.6(7)  | 5.6(7)   |
| C1  | 70.6(18) | 45.2(14) | 31.4(12) | 7.5(10)   | 18.7(12) | 18.6(13) |
| C2  | 111(2)   | 33.8(13) | 32.0(12) | 2.8(10)   | 36.3(15) | -4.5(14) |
| C3  | 135(4)   | 39.7(16) | 56.6(19) | 0.7(13)   | 33(2)    | 0.4(18)  |
| C4  | 66(2)    | 125(4)   | 95(3)    | 53(3)     | 38(2)    | 43(2)    |
| C5  | 147(4)   | 72(2)    | 116(3)   | 23(2)     | 109(3)   | 20(2)    |
| C6  | 234(6)   | 61(2)    | 31.2(16) | 7.9(15)   | 19(2)    | 1(3)     |
| C7  | 26.0(9)  | 37.5(11) | 23.7(9)  | -1.8(8)   | 12.0(8)  | -3.9(8)  |
| C8  | 22.5(9)  | 34.6(10) | 23.5(9)  | -3.3(7)   | 9.8(7)   | -3.8(7)  |
| C9  | 26.0(9)  | 37.2(11) | 23.5(9)  | -2.2(8)   | 13.6(8)  | -3.5(8)  |
| C10 | 29.8(10) | 34.9(11) | 25.9(9)  | 0.8(8)    | 13.3(8)  | -1.9(8)  |
| C11 | 31.8(10) | 37.4(11) | 30.5(10) | -4.6(8)   | 16.8(9)  | 1.6(8)   |
| C12 | 30.8(10) | 44.2(12) | 24.8(9)  | -2.3(8)   | 16.4(8)  | -1.3(9)  |
| C13 | 39.3(11) | 33.9(11) | 30.1(10) | -1.7(8)   | 22.0(9)  | -3.6(9)  |
| C14 | 59.6(18) | 71(2)    | 80(2)    | -15.7(17) | 37.4(17) | 24.1(15) |
| C15 | 55.2(15) | 62.4(16) | 27.3(11) | -2.5(10)  | 22.0(11) | 0.2(12)  |
| C16 | 50.1(14) | 34.6(12) | 43.5(13) | 2.2(9)    | 22.8(11) | 3.2(10)  |
| B1  | 28.2(11) | 39.5(13) | 25.9(11) | -1.0(9)   | 14.0(9)  | -1.9(9)  |

**Table 4 Bond Lengths for 6f.**

| Atom Atom Length/Å |     |          | Atom Atom Length/Å |     |          |
|--------------------|-----|----------|--------------------|-----|----------|
| O1                 | C1  | 1.464(3) | C1                 | C3  | 1.459(4) |
| O1                 | B1  | 1.350(3) | C1                 | C4  | 1.558(5) |
| O2                 | C2  | 1.457(3) | C2                 | C5  | 1.591(6) |
| O2                 | B1  | 1.361(3) | C2                 | C6  | 1.447(5) |
| O3                 | C13 | 1.332(3) | C7                 | C8  | 1.410(3) |
| O3                 | C14 | 1.448(3) | C7                 | C12 | 1.389(3) |
| O4                 | C13 | 1.196(3) | C7                 | B1  | 1.563(3) |
| O5                 | C9  | 1.378(2) | C8                 | C9  | 1.384(3) |
| O5                 | C15 | 1.433(3) | C8                 | C13 | 1.496(3) |
| O6                 | C10 | 1.356(3) | C9                 | C10 | 1.407(3) |
| O6                 | C16 | 1.431(3) | C10                | C11 | 1.391(3) |
| C1                 | C2  | 1.514(4) | C11                | C12 | 1.383(3) |

**Table 5 Bond Angles for 6f.**

| Atom Atom Atom Angle/° |    |    |            | Atom Atom Atom Angle/° |    |     |            |
|------------------------|----|----|------------|------------------------|----|-----|------------|
| B1                     | O1 | C1 | 106.49(17) | C12                    | C7 | B1  | 118.51(18) |
| B1                     | O2 | C2 | 106.77(18) | C7                     | C8 | C13 | 121.67(18) |

|     |    |     |            |     |     |     |            |
|-----|----|-----|------------|-----|-----|-----|------------|
| C13 | O3 | C14 | 115.7(2)   | C9  | C8  | C7  | 121.10(19) |
| C9  | O5 | C15 | 114.58(16) | C9  | C8  | C13 | 117.22(17) |
| C10 | O6 | C16 | 117.04(17) | O5  | C9  | C8  | 119.29(18) |
| O1  | C1 | C2  | 103.32(19) | O5  | C9  | C10 | 119.91(18) |
| O1  | C1 | C4  | 105.2(2)   | C8  | C9  | C10 | 120.51(18) |
| C2  | C1 | C4  | 107.9(3)   | O6  | C10 | C9  | 116.38(18) |
| C3  | C1 | O1  | 110.4(2)   | O6  | C10 | C11 | 124.80(19) |
| C3  | C1 | C2  | 119.1(3)   | C11 | C10 | C9  | 118.82(19) |
| C3  | C1 | C4  | 110.0(3)   | C12 | C11 | C10 | 119.72(19) |
| O2  | C2 | C1  | 103.70(19) | C11 | C12 | C7  | 122.88(18) |
| O2  | C2 | C5  | 103.6(3)   | O3  | C13 | C8  | 111.12(17) |
| C1  | C2 | C5  | 108.7(3)   | O4  | C13 | O3  | 123.8(2)   |
| C6  | C2 | O2  | 110.3(3)   | O4  | C13 | C8  | 125.1(2)   |
| C6  | C2 | C1  | 122.8(4)   | O1  | B1  | O2  | 113.9(2)   |
| C6  | C2 | C5  | 106.3(4)   | O1  | B1  | C7  | 126.06(19) |
| C8  | C7 | B1  | 124.53(19) | O2  | B1  | C7  | 120.0(2)   |
| C12 | C7 | C8  | 116.91(19) |     |     |     |            |

**Table 6 Torsion Angles for 6f.**

| <b>A</b> | <b>B</b> | <b>C</b> | <b>D</b> | <b>Angle/°</b> | <b>A</b> | <b>B</b> | <b>C</b> | <b>D</b> | <b>Angle/°</b> |
|----------|----------|----------|----------|----------------|----------|----------|----------|----------|----------------|
| O1       | C1       | C2       | O2       | -23.6(3)       | C9       | C8       | C13      | O3       | 114.6(2)       |
| O1       | C1       | C2       | C5       | 86.2(3)        | C9       | C8       | C13      | O4       | -64.5(3)       |
| O1       | C1       | C2       | C6       | -149.1(4)      | C9       | C10      | C11      | C12      | 2.0(3)         |
| O5       | C9       | C10      | O6       | 5.1(3)         | C10      | C11      | C12      | C7       | -1.9(3)        |
| O5       | C9       | C10      | C11      | -174.13(18)    | C12      | C7       | C8       | C9       | 1.9(3)         |
| O6       | C10      | C11      | C12      | -177.07(19)    | C12      | C7       | C8       | C13      | -179.38(18)    |
| C1       | O1       | B1       | O2       | -11.3(3)       | C12      | C7       | B1       | O1       | 150.4(2)       |
| C1       | O1       | B1       | C7       | 170.9(2)       | C12      | C7       | B1       | O2       | -27.2(3)       |
| C2       | O2       | B1       | O1       | -4.6(3)        | C13      | C8       | C9       | O5       | -6.6(3)        |
| C2       | O2       | B1       | C7       | 173.3(2)       | C13      | C8       | C9       | C10      | 179.45(18)     |
| C3       | C1       | C2       | O2       | -146.4(3)      | C14      | O3       | C13      | O4       | -4.0(3)        |
| C3       | C1       | C2       | C5       | -36.6(4)       | C14      | O3       | C13      | C8       | 176.9(2)       |
| C3       | C1       | C2       | C6       | 88.1(5)        | C15      | O5       | C9       | C8       | 106.7(2)       |
| C4       | C1       | C2       | O2       | 87.4(3)        | C15      | O5       | C9       | C10      | -79.3(2)       |
| C4       | C1       | C2       | C5       | -162.8(3)      | C16      | O6       | C10      | C9       | -172.58(19)    |
| C4       | C1       | C2       | C6       | -38.1(4)       | C16      | O6       | C10      | C11      | 6.6(3)         |
| C7       | C8       | C9       | O5       | 172.17(17)     | B1       | O1       | C1       | C2       | 21.5(3)        |

|                         |                          |
|-------------------------|--------------------------|
| C7 C8 C9 C10 -1.7(3)    | B1 O1 C1 C3 149.9(3)     |
| C7 C8 C13 O3 -64.2(2)   | B1 O1 C1 C4 -91.5(3)     |
| C7 C8 C13 O4 116.7(2)   | B1 O2 C2 C1 17.7(3)      |
| C8 C7 C12 C11 0.0(3)    | B1 O2 C2 C5 -95.7(3)     |
| C8 C7 B1 O1 -32.2(3)    | B1 O2 C2 C6 150.9(4)     |
| C8 C7 B1 O2 150.1(2)    | B1 C7 C8 C9 -175.53(18)  |
| C8 C9 C10 O6 178.94(18) | B1 C7 C8 C13 3.2(3)      |
| C8 C9 C10 C11 -0.3(3)   | B1 C7 C12 C11 177.54(19) |

**Table 7 Hydrogen Atom Coordinates ( $\text{\AA} \times 10^4$ ) and Isotropic Displacement Parameters ( $\text{\AA}^2 \times 10^3$ ) for 6f.**

| Atom | <i>x</i> | <i>y</i> | <i>z</i> | U(eq) |
|------|----------|----------|----------|-------|
| H3A  | 922      | -1085    | 7169     | 124   |
| H3B  | 1594     | -1546    | 7948     | 124   |
| H3C  | 1509     | -1703    | 7044     | 124   |
| H4A  | 2442     | -311     | 7325     | 144   |
| H4B  | 2627     | -7       | 8260     | 144   |
| H4C  | 2522     | 1346     | 7655     | 144   |
| H5A  | 885      | 297      | 8251     | 139   |



|      |      |      |      |     |
|------|------|------|------|-----|
| H5B  | 529  | 1122 | 7384 | 139 |
| H5C  | 762  | 2037 | 8215 | 139 |
| H6A  | 2459 | 1675 | 8927 | 191 |
| H6B  | 1972 | 852  | 9172 | 191 |
| H6C  | 1935 | 2605 | 9059 | 191 |
| H11  | 430  | 7091 | 5788 | 39  |
| H12  | 736  | 5123 | 6689 | 38  |
| H14A | 2155 | 70   | 5672 | 103 |
| H14B | 2848 | 823  | 6228 | 103 |
| H14C | 2482 | 1064 | 5256 | 103 |
| H15A | 524  | 3716 | 3447 | 71  |
| H15B | 854  | 4841 | 3092 | 71  |
| H15C | 350  | 5435 | 3377 | 71  |
| H16A | -6   | 8563 | 4661 | 64  |
| H16B | 371  | 9453 | 4273 | 64  |
| H16C | 735  | 9048 | 5228 | 64  |

**Crystal Data.** C<sub>16</sub>H<sub>23</sub>O<sub>6</sub>B,  $M = 322.15$ , monoclinic,  $a = 23.4123(4) \text{ \AA}$ ,  $b = 9.0701(2) \text{ \AA}$ ,  $c = 18.5703(3) \text{ \AA}$ ,  $\beta = 118.6010(10)^\circ$ ,  $V = 3462.24(12) \text{ \AA}^3$ ,  $T = 172.99$ , space group C2/c (no. 15),  $Z = 8$ ,  $\mu(\text{CuK}\alpha) = 0.767$ , 15915 reflections measured, 3362 unique ( $R_{\text{int}} = 0.0246$ ) which were used in all calculations. The final  $wR_2$  was 0.1943 (all data) and  $R_1$  was 0.0663 ( $I > 2\sigma(I)$ ).

**Figure 2. IrCODSiPbz (9)**

The following are 50% thermal ellipsoidal drawings of the molecule in the asymmetric cell with various amount of labeling

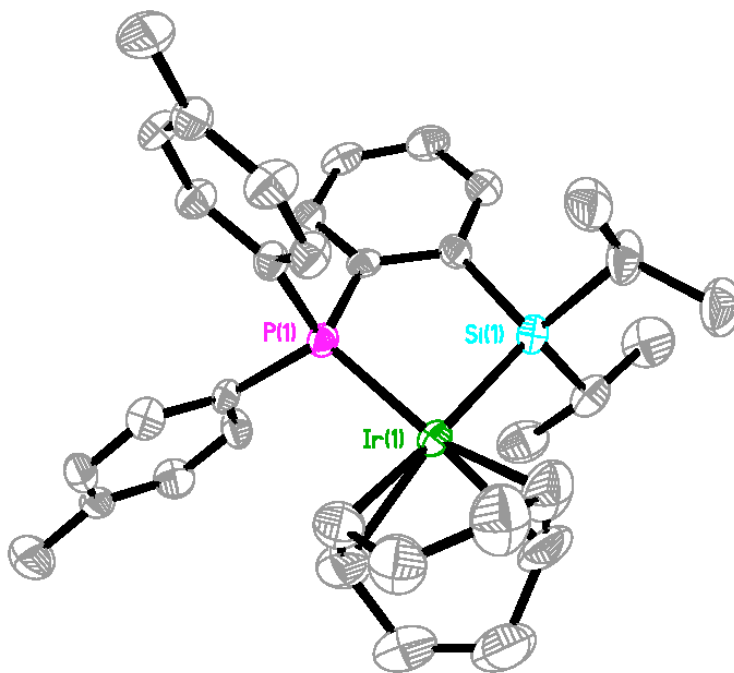

**Table 1 Crystal data and structure refinement for 9**

|                   |                                       |
|-------------------|---------------------------------------|
| Empirical formula | C <sub>34</sub> H <sub>44</sub> IrPSi |
| Formula weight    | 703.95                                |
| Temperature/K     | 173.15                                |
| Crystal system    | triclinic                             |
| Space group       | P-1                                   |
| a/Å               | 9.9128(11)                            |
| b/Å               | 10.2416(11)                           |
| c/Å               | 16.4821(18)                           |

|                                               |                                                              |
|-----------------------------------------------|--------------------------------------------------------------|
| $\alpha/^\circ$                               | 77.3150(10)                                                  |
| $\beta/^\circ$                                | 86.7650(10)                                                  |
| $\gamma/^\circ$                               | 69.1190(10)                                                  |
| Volume/ $\text{\AA}^3$                        | 1524.8(3)                                                    |
| Z                                             | 2                                                            |
| $\rho_{\text{calc}}/\text{mg}/\text{mm}^3$    | 1.533                                                        |
| $\text{m}/\text{mm}^{-1}$                     | 4.491                                                        |
| F(000)                                        | 708.0                                                        |
| Crystal size/ $\text{mm}^3$                   | $0.10 \times 0.092 \times 0.073$                             |
| Radiation                                     | MoK $\alpha$ ( $\lambda = 0.71073$ )                         |
| 2 $\Theta$ range for data collection          | 4.358 to 50.38 $^\circ$                                      |
| Index ranges                                  | $-11 \leq h \leq 11, -12 \leq k \leq 12, -19 \leq l \leq 19$ |
| Reflections collected                         | 28194                                                        |
| Independent reflections                       | 5481[R(int) = 0.0621]                                        |
| Data/restraints/parameters                    | 5481/48/340                                                  |
| Goodness-of-fit on $F^2$                      | 1.060                                                        |
| Final R indexes [ $I \geq 2\sigma(I)$ ]       | $R_1 = 0.0395, wR_2 = 0.0819$                                |
| Final R indexes [all data]                    | $R_1 = 0.0519, wR_2 = 0.0884$                                |
| Largest diff. peak/hole / $e \text{\AA}^{-3}$ | 1.19/-0.95                                                   |

**Table 2 Fractional Atomic Coordinates ( $\times 10^4$ ) and Equivalent Isotropic Displacement Parameters ( $\text{\AA}^2 \times 10^3$ ) for 9.  $U_{\text{eq}}$  is defined as 1/3 of the trace of the orthogonalised  $U_{ij}$  tensor.**

| <b>Atom</b> | <b><i>x</i></b> | <b><i>y</i></b> | <b><i>z</i></b> | <b>U(eq)</b> |
|-------------|-----------------|-----------------|-----------------|--------------|
| Ir1         | 4582.2(3)       | 2779.6(3)       | 2879.2(2)       | 25.08(9)     |
| P1          | 2438.2(17)      | 2567.3(17)      | 2683.2(10)      | 22.7(4)      |
| Si1         | 5470.3(19)      | 994.8(19)       | 2077.0(11)      | 26.2(4)      |
| C1          | 3665(9)         | 4768(9)         | 3394(5)         | 49.9(16)     |
| C2          | 4035(10)        | 3579(9)         | 4045(5)         | 54.4(17)     |
| C3          | 5417(10)        | 2942(11)        | 4585(6)         | 69.2(19)     |
| C4          | 6723(11)        | 2927(12)        | 4112(6)         | 75(2)        |
| C5          | 6722(9)         | 2648(11)        | 3257(6)         | 62.8(18)     |
| C6          | 6270(10)        | 3661(10)        | 2546(7)         | 63.4(18)     |
| C7          | 5631(11)        | 5262(10)        | 2517(7)         | 70.7(19)     |
| C8          | 4560(10)        | 5695(9)         | 3136(6)         | 58.1(17)     |
| C9          | 2594(7)         | 1009(6)         | 2264(4)         | 23.2(14)     |
| C10         | 3896(7)         | 398(7)          | 1893(4)         | 26.4(14)     |
| C11         | 3965(8)         | -644(7)         | 1459(4)         | 34.6(16)     |
| C12         | 2844(8)         | -1140(7)        | 1439(4)         | 36.3(17)     |
| C13         | 1601(8)         | -585(7)         | 1858(4)         | 34.1(16)     |
| C14         | 1458(7)         | 505(7)          | 2259(4)         | 29.5(15)     |
| C15         | 1363(6)         | 2459(7)         | 3612(4)         | 24.5(14)     |
| C16         | 1707(7)         | 1184(7)         | 4195(4)         | 31.3(15)     |
| C17         | 1056(8)         | 1127(8)         | 4956(4)         | 37.3(17)     |
| C18         | 55(7)           | 2342(8)         | 5168(4)         | 31.8(16)     |

|     |          |          |         |          |
|-----|----------|----------|---------|----------|
| C19 | -289(7)  | 3612(7)  | 4587(4) | 31.5(15) |
| C20 | 356(7)   | 3669(7)  | 3818(4) | 30.8(15) |
| C21 | -637(9)  | 2253(10) | 6011(5) | 53(2)    |
| C22 | 1246(7)  | 4053(7)  | 1930(4) | 26.2(14) |
| C23 | 1763(8)  | 5083(7)  | 1473(4) | 34.5(16) |
| C24 | 896(8)   | 6180(8)  | 871(4)  | 40.1(18) |
| C25 | -500(7)  | 6305(7)  | 695(4)  | 33.3(16) |
| C26 | -999(7)  | 5275(8)  | 1148(4) | 35.1(17) |
| C27 | -169(7)  | 4179(7)  | 1757(4) | 31.4(16) |
| C28 | -1417(9) | 7515(8)  | 36(5)   | 49(2)    |
| C29 | 6218(8)  | 1409(9)  | 1000(5) | 45(2)    |
| C30 | 7794(9)  | 1332(10) | 997(5)  | 58(2)    |
| C31 | 5260(9)  | 2830(9)  | 474(5)  | 52(2)    |
| C32 | 6884(7)  | -706(7)  | 2705(4) | 35.0(16) |
| C33 | 7549(9)  | -1913(8) | 2263(6) | 58(2)    |
| C34 | 6267(9)  | -1220(9) | 3537(5) | 52(2)    |

**Table 3 Anisotropic Displacement Parameters ( $\text{\AA}^2 \times 10^3$ ) for 9. The Anisotropic displacement factor exponent takes the form:  $-2\pi^2[h^2a^{*2}U_{11}+\dots+2hka \times b \times U_{12}]$**

| Atom | $U_{11}$  | $U_{22}$  | $U_{33}$  | $U_{23}$  | $U_{13}$  | $U_{12}$   |
|------|-----------|-----------|-----------|-----------|-----------|------------|
| Ir1  | 21.24(14) | 26.01(14) | 29.25(15) | -4.56(10) | -0.53(10) | -10.49(11) |
| P1   | 19.0(8)   | 26.0(9)   | 22.9(8)   | -3.3(7)   | 1.2(7)    | -9.1(7)    |

|     |         |         |          |         |        |         |
|-----|---------|---------|----------|---------|--------|---------|
| Si1 | 21.1(9) | 23.7(9) | 32.6(10) | -5.4(8) | 3.5(8) | -7.4(8) |
| C1  | 50(3)   | 48(3)   | 65(4)    | -32(3)  | 3(3)   | -21(3)  |
| C2  | 58(4)   | 64(4)   | 57(4)    | -25(3)  | 1(3)   | -33(3)  |
| C3  | 68(4)   | 80(4)   | 70(4)    | -20(3)  | -17(3) | -34(3)  |
| C4  | 60(4)   | 78(4)   | 90(4)    | -31(4)  | -27(3) | -17(3)  |
| C5  | 39(3)   | 71(4)   | 94(4)    | -41(3)  | -15(3) | -23(3)  |
| C6  | 50(4)   | 63(4)   | 96(4)    | -33(3)  | 11(3)  | -34(3)  |
| C7  | 68(4)   | 60(4)   | 93(4)    | -21(3)  | 15(3)  | -33(3)  |
| C8  | 61(4)   | 46(3)   | 76(4)    | -25(3)  | 7(3)   | -24(3)  |
| C9  | 25(3)   | 24(3)   | 17(3)    | 2(3)    | -5(3)  | -8(3)   |
| C10 | 26(4)   | 30(4)   | 22(3)    | -3(3)   | 3(3)   | -10(3)  |
| C11 | 33(4)   | 38(4)   | 34(4)    | -13(3)  | 1(3)   | -10(3)  |
| C12 | 41(4)   | 31(4)   | 39(4)    | -7(3)   | -8(3)  | -14(3)  |
| C13 | 33(4)   | 32(4)   | 38(4)    | -3(3)   | -13(3) | -15(3)  |
| C14 | 24(4)   | 35(4)   | 28(3)    | -4(3)   | -2(3)  | -9(3)   |
| C15 | 15(3)   | 30(4)   | 30(3)    | -8(3)   | 2(3)   | -9(3)   |
| C16 | 28(4)   | 33(4)   | 28(4)    | -5(3)   | 8(3)   | -7(3)   |
| C17 | 42(4)   | 34(4)   | 29(4)    | 3(3)    | -2(3)  | -10(4)  |
| C18 | 27(4)   | 48(4)   | 28(4)    | -14(3)  | 3(3)   | -19(3)  |
| C19 | 30(4)   | 33(4)   | 32(4)    | -12(3)  | 7(3)   | -10(3)  |
| C20 | 32(4)   | 24(3)   | 35(4)    | 0(3)    | 1(3)   | -11(3)  |
| C21 | 58(6)   | 65(6)   | 39(5)    | -15(4)  | 9(4)   | -23(5)  |

|     |       |       |       |        |        |        |
|-----|-------|-------|-------|--------|--------|--------|
| C22 | 24(4) | 25(3) | 28(3) | -3(3)  | 2(3)   | -9(3)  |
| C23 | 29(4) | 36(4) | 35(4) | 2(3)   | 1(3)   | -13(3) |
| C24 | 42(5) | 36(4) | 38(4) | 10(3)  | -7(3)  | -18(4) |
| C25 | 32(4) | 28(4) | 33(4) | -5(3)  | -3(3)  | -3(3)  |
| C26 | 21(4) | 42(4) | 37(4) | -7(3)  | -8(3)  | -5(3)  |
| C27 | 29(4) | 34(4) | 32(4) | -2(3)  | -3(3)  | -13(3) |
| C28 | 49(5) | 48(5) | 36(4) | 2(4)   | -12(4) | -8(4)  |
| C29 | 31(4) | 48(5) | 49(5) | 3(4)   | 10(4)  | -15(4) |
| C30 | 40(5) | 75(6) | 53(5) | 1(5)   | 12(4)  | -25(5) |
| C31 | 48(5) | 57(5) | 37(4) | 5(4)   | 5(4)   | -12(4) |
| C32 | 29(4) | 25(4) | 48(4) | -2(3)  | -6(3)  | -9(3)  |
| C33 | 57(6) | 30(4) | 76(6) | -17(4) | -10(5) | 3(4)   |
| C34 | 57(6) | 48(5) | 46(5) | 5(4)   | -15(4) | -18(4) |

**Table 4 Bond Lengths for 9.**

| Atom Atom Length/Å |     |            | Atom Atom Length/Å |     |           |
|--------------------|-----|------------|--------------------|-----|-----------|
| Ir1                | P1  | 2.2597(16) | C10                | C11 | 1.389(9)  |
| Ir1                | Si1 | 2.3764(18) | C11                | C12 | 1.381(10) |
| Ir1                | C1  | 2.246(8)   | C12                | C13 | 1.377(10) |
| Ir1                | C2  | 2.217(8)   | C13                | C14 | 1.380(9)  |
| Ir1                | C5  | 2.194(8)   | C15                | C16 | 1.384(9)  |
| Ir1                | C6  | 2.161(8)   | C15                | C20 | 1.383(9)  |

|     |     |           |     |     |           |
|-----|-----|-----------|-----|-----|-----------|
| P1  | C9  | 1.829(6)  | C16 | C17 | 1.376(9)  |
| P1  | C15 | 1.821(6)  | C17 | C18 | 1.388(10) |
| P1  | C22 | 1.819(6)  | C18 | C19 | 1.377(9)  |
| Si1 | C10 | 1.928(7)  | C18 | C21 | 1.515(10) |
| Si1 | C29 | 1.904(7)  | C19 | C20 | 1.386(9)  |
| Si1 | C32 | 1.924(7)  | C22 | C23 | 1.391(9)  |
| C1  | C2  | 1.386(12) | C22 | C27 | 1.402(9)  |
| C1  | C8  | 1.500(11) | C23 | C24 | 1.379(9)  |
| C2  | C3  | 1.530(12) | C24 | C25 | 1.385(10) |
| C3  | C4  | 1.470(13) | C25 | C26 | 1.377(10) |
| C4  | C5  | 1.498(13) | C25 | C28 | 1.503(9)  |
| C5  | C6  | 1.357(13) | C26 | C27 | 1.373(9)  |
| C6  | C7  | 1.523(12) | C29 | C30 | 1.536(10) |
| C7  | C8  | 1.452(12) | C29 | C31 | 1.525(10) |
| C9  | C10 | 1.391(9)  | C32 | C33 | 1.502(10) |
| C9  | C14 | 1.397(9)  | C32 | C34 | 1.533(10) |

**Table 5 Bond Angles for 9.**

| <b>Atom Atom Atom Angle/°</b> |     |     |          | <b>Atom Atom Atom Angle/°</b> |    |     |          |
|-------------------------------|-----|-----|----------|-------------------------------|----|-----|----------|
| P1                            | Ir1 | Si1 | 83.53(6) | C7                            | C6 | Ir1 | 108.2(6) |
| C1                            | Ir1 | P1  | 96.0(2)  | C8                            | C7 | C6  | 115.7(8) |
| C1                            | Ir1 | Si1 | 168.7(2) | C7                            | C8 | C1  | 115.1(7) |



|     |     |     |          |     |     |     |          |
|-----|-----|-----|----------|-----|-----|-----|----------|
| C2  | Ir1 | P1  | 96.8(2)  | C10 | C9  | P1  | 115.8(5) |
| C2  | Ir1 | Si1 | 155.1(2) | C10 | C9  | C14 | 121.1(6) |
| C2  | Ir1 | C1  | 36.2(3)  | C14 | C9  | P1  | 123.0(5) |
| C5  | Ir1 | P1  | 169.6(3) | C9  | C10 | Si1 | 117.1(5) |
| C5  | Ir1 | Si1 | 95.2(2)  | C11 | C10 | Si1 | 125.9(5) |
| C5  | Ir1 | C1  | 87.3(3)  | C11 | C10 | C9  | 116.9(6) |
| C5  | Ir1 | C2  | 80.0(3)  | C12 | C11 | C10 | 122.6(7) |
| C6  | Ir1 | P1  | 154.0(3) | C13 | C12 | C11 | 119.4(7) |
| C6  | Ir1 | Si1 | 95.0(3)  | C12 | C13 | C14 | 119.9(6) |
| C6  | Ir1 | C1  | 80.5(3)  | C13 | C14 | C9  | 120.0(6) |
| C6  | Ir1 | C2  | 95.2(3)  | C16 | C15 | P1  | 119.6(5) |
| C6  | Ir1 | C5  | 36.3(3)  | C20 | C15 | P1  | 121.5(5) |
| C9  | P1  | Ir1 | 113.8(2) | C20 | C15 | C16 | 118.0(6) |
| C15 | P1  | Ir1 | 114.9(2) | C17 | C16 | C15 | 120.7(6) |
| C15 | P1  | C9  | 105.9(3) | C16 | C17 | C18 | 121.4(6) |
| C22 | P1  | Ir1 | 113.6(2) | C17 | C18 | C21 | 120.4(7) |
| C22 | P1  | C9  | 103.1(3) | C19 | C18 | C17 | 118.0(6) |
| C22 | P1  | C15 | 104.5(3) | C19 | C18 | C21 | 121.6(7) |
| C10 | Si1 | Ir1 | 107.4(2) | C18 | C19 | C20 | 120.7(6) |
| C29 | Si1 | Ir1 | 120.9(3) | C15 | C20 | C19 | 121.2(6) |
| C29 | Si1 | C10 | 104.5(3) | C23 | C22 | P1  | 119.4(5) |
| C29 | Si1 | C32 | 107.6(3) | C23 | C22 | C27 | 117.8(6) |

|     |     |     |          |     |     |     |          |
|-----|-----|-----|----------|-----|-----|-----|----------|
| C32 | Si1 | Ir1 | 110.8(2) | C27 | C22 | P1  | 122.8(5) |
| C32 | Si1 | C10 | 104.2(3) | C24 | C23 | C22 | 120.2(6) |
| C2  | C1  | Ir1 | 70.8(5)  | C23 | C24 | C25 | 122.3(6) |
| C2  | C1  | C8  | 124.1(8) | C24 | C25 | C28 | 120.9(6) |
| C8  | C1  | Ir1 | 110.0(5) | C26 | C25 | C24 | 117.1(6) |
| C1  | C2  | Ir1 | 73.1(5)  | C26 | C25 | C28 | 122.0(7) |
| C1  | C2  | C3  | 127.2(8) | C27 | C26 | C25 | 122.1(6) |
| C3  | C2  | Ir1 | 106.5(6) | C26 | C27 | C22 | 120.6(6) |
| C4  | C3  | C2  | 113.4(8) | C30 | C29 | Si1 | 114.6(6) |
| C3  | C4  | C5  | 114.8(8) | C31 | C29 | Si1 | 112.4(5) |
| C4  | C5  | Ir1 | 111.8(6) | C31 | C29 | C30 | 110.5(6) |
| C6  | C5  | Ir1 | 70.5(5)  | C33 | C32 | Si1 | 116.1(5) |
| C6  | C5  | C4  | 125.8(9) | C33 | C32 | C34 | 110.8(6) |
| C5  | C6  | Ir1 | 73.2(5)  | C34 | C32 | Si1 | 110.3(5) |
| C5  | C6  | C7  | 124.0(9) |     |     |     |          |

**Table 6 Torsion Angles for 9.**

| <b>A</b> | <b>B</b> | <b>C</b> | <b>D</b> | <b>Angle/°</b> | <b>A</b> | <b>B</b> | <b>C</b> | <b>D</b> | <b>Angle/°</b> |
|----------|----------|----------|----------|----------------|----------|----------|----------|----------|----------------|
| Ir1      | P1       | C9       | C10      | -18.1(5)       | C9       | P1       | C22      | C27      | 60.7(6)        |
| Ir1      | P1       | C9       | C14      | 166.1(4)       | C9       | C10      | C11      | C12      | -4.5(10)       |
| Ir1      | P1       | C15      | C16      | -78.0(5)       | C10      | C9       | C14      | C13      | -2.2(9)        |
| Ir1      | P1       | C15      | C20      | 91.6(5)        | C10      | C11      | C12      | C13      | 0.3(11)        |

|                          |                           |
|--------------------------|---------------------------|
| Ir1 P1 C22 C23 7.3(6)    | C11 C12 C13 C14 3.1(10)   |
| Ir1 P1 C22 C27 -175.7(5) | C12 C13 C14 C9 -2.2(10)   |
| Ir1 C1 C2 C3 98.2(9)     | C14 C9 C10 Si1 -171.3(5)  |
| Ir1 C1 C8 C7 9.9(10)     | C14 C9 C10 C11 5.4(9)     |
| Ir1 C2 C3 C4 40.3(10)    | C15 P1 C9 C10 -145.2(5)   |
| Ir1 C5 C6 C7 101.0(9)    | C15 P1 C9 C14 39.0(6)     |
| Ir1 C6 C7 C8 36.4(11)    | C15 P1 C22 C23 133.2(5)   |
| P1 C9 C10 Si1 12.8(6)    | C15 P1 C22 C27 -49.8(6)   |
| P1 C9 C10 C11 -170.5(5)  | C15 C16 C17 C18 -1.0(11)  |
| P1 C9 C14 C13 173.4(5)   | C16 C15 C20 C19 0.3(10)   |
| P1 C15 C16 C17 170.3(5)  | C16 C17 C18 C19 1.1(11)   |
| P1 C15 C20 C19 -169.5(5) | C16 C17 C18 C21 -179.4(7) |
| P1 C22 C23 C24 177.0(6)  | C17 C18 C19 C20 -0.4(10)  |
| P1 C22 C27 C26 -176.2(5) | C18 C19 C20 C15 -0.2(10)  |
| Si1 C10 C11 C12 171.8(5) | C20 C15 C16 C17 0.3(10)   |
| C1 C2 C3 C4 -40.7(13)    | C21 C18 C19 C20 -179.9(7) |
| C2 C1 C8 C7 89.7(11)     | C22 P1 C9 C10 105.3(5)    |
| C2 C3 C4 C5 -35.6(13)    | C22 P1 C9 C14 -70.5(6)    |
| C3 C4 C5 Ir1 11.6(12)    | C22 P1 C15 C16 156.9(5)   |
| C3 C4 C5 C6 92.7(12)     | C22 P1 C15 C20 -33.5(6)   |
| C4 C5 C6 Ir1 -103.3(9)   | C22 C23 C24 C25 -0.2(11)  |
| C4 C5 C6 C7 -2.4(15)     | C23 C22 C27 C26 0.9(10)   |

|               |           |                 |           |
|---------------|-----------|-----------------|-----------|
| C5 C6 C7 C8   | -45.2(13) | C23 C24 C25 C26 | -0.2(11)  |
| C6 C7 C8 C1   | -31.4(13) | C23 C24 C25 C28 | 179.9(7)  |
| C8 C1 C2 Ir1  | -101.6(8) | C24 C25 C26 C27 | 0.9(10)   |
| C8 C1 C2 C3   | -3.4(14)  | C25 C26 C27 C22 | -1.3(11)  |
| C9 P1 C15 C16 | 48.4(6)   | C27 C22 C23 C24 | -0.2(10)  |
| C9 P1 C15 C20 | -142.0(5) | C28 C25 C26 C27 | -179.2(7) |
| C9 P1 C22 C23 | -116.3(6) |                 |           |

**Table 7 Hydrogen Atom Coordinates ( $\text{\AA}\times 10^4$ ) and Isotropic Displacement Parameters ( $\text{\AA}^2\times 10^3$ ) for 9.**

| Atom | <i>x</i> | <i>y</i> | <i>z</i> | U(eq) |
|------|----------|----------|----------|-------|
| H1   | 2602     | 5280     | 3294     | 60    |
| H2   | 3185     | 3391     | 4331     | 65    |
| H3A  | 5319     | 3503     | 5018     | 83    |
| H3B  | 5532     | 1950     | 4871     | 83    |
| H4A  | 7570     | 2183     | 4430     | 90    |
| H4B  | 6839     | 3861     | 4063     | 90    |
| H5   | 7519     | 1761     | 3173     | 75    |
| H6   | 6811     | 3399     | 2040     | 76    |
| H7A  | 6429     | 5599     | 2584     | 85    |
| H7B  | 5183     | 5753     | 1958     | 85    |
| H8A  | 3904     | 6686     | 2914     | 70    |

|      |       |       |      |    |
|------|-------|-------|------|----|
| H8B  | 5061  | 5705  | 3636 | 70 |
| H11  | 4816  | -1030 | 1166 | 41 |
| H12  | 2930  | -1857 | 1139 | 44 |
| H13  | 842   | -952  | 1871 | 41 |
| H14  | 588   | 912   | 2532 | 35 |
| H16  | 2400  | 339   | 4070 | 38 |
| H17  | 1296  | 237   | 5343 | 45 |
| H19  | -976  | 4457  | 4716 | 38 |
| H20  | 101   | 4555  | 3426 | 37 |
| H21A | -163  | 2603  | 6378 | 80 |
| H21B | -530  | 1257  | 6254 | 80 |
| H21C | -1665 | 2844  | 5948 | 80 |
| H23  | 2716  | 5030  | 1576 | 41 |
| H24  | 1269  | 6873  | 568  | 48 |
| H26  | -1947 | 5325  | 1035 | 42 |
| H27  | -557  | 3500  | 2064 | 38 |
| H28A | -1473 | 7158  | -461 | 73 |
| H28B | -986  | 8259  | -105 | 73 |
| H28C | -2391 | 7918  | 245  | 73 |
| H29  | 6200  | 651   | 712  | 54 |
| H30A | 7852  | 2128  | 1215 | 87 |
| H30B | 8145  | 1396  | 427  | 87 |

|           |       |      |    |
|-----------|-------|------|----|
| H30C 8390 | 424   | 1349 | 87 |
| H31A 4272 | 2836  | 451  | 78 |
| H31B 5632 | 2951  | -91  | 78 |
| H31C 5261 | 3615  | 722  | 78 |
| H32 7692  | -418  | 2844 | 42 |
| H33A 6810 | -2287 | 2152 | 87 |
| H33B 8327 | -2677 | 2611 | 87 |
| H33C 7942 | -1563 | 1735 | 87 |
| H34A 5926 | -444  | 3840 | 79 |
| H34B 7020 | -2041 | 3869 | 79 |
| H34C 5458 | -1505 | 3434 | 79 |

**Crystal Data.**  $C_{34}H_{44}IrPSi$ ,  $M=703.95$ , triclinic,  $a = 9.9128(11) \text{ \AA}$ ,  $b = 10.2416(11) \text{ \AA}$ ,  $c = 16.4821(18) \text{ \AA}$ ,  $\alpha = 77.3150(10)^\circ$ ,  $\beta = 86.7650(10)^\circ$ ,  $\gamma = 69.1190(10)^\circ$ ,  $V = 1524.8(3) \text{ \AA}^3$ ,  $T = 173.15$ , space group P-1 (no. 2),  $Z = 2$ ,  $\mu(\text{MoK}\alpha) = 4.491$ , 28194 reflections measured, 5481 unique ( $R_{\text{int}} = 0.0621$ ) which were used in all calculations. The final  $wR_2$  was 0.0884 (all data) and  $R_1$  was 0.0395 ( $I > 2\sigma(I)$ ).

## References

1. Conifer, C. M.; Law, D. J.; Sunley, G. J.; White, A. J. P.; Britovsek, G. J. *Organometallics* **2011**, *30*, 4060.
2. Wolan, A.; Zaidlewicz, M. *Org. Biomol. Chem.* **2003**, *1*, 3274–3276.
3. Ishiyama, T.; Isou, H.; Kikuchi, T.; Miyaura, N. *Chem. Commun.* **2010**, *46*, 159–161.
4. Kawamorita, S.; Ohmiya, H.; Hara, K.; Fukuoka, A.; Sawamura, M. *J. Am. Chem. Soc.* **2009**, *131*, 5058–5059.
- 5a. Chotana, G. A.; Rak, M. A.; Smith, M. R., III. *J. Am. Chem. Soc.* **2005**, *127*, 10539. 5b. Tajuddin, H.; Harrison, P.; Bitterlich, B.; Collings, J. C.; Sim, N.; Batsanov, A. S.; Cheung, M. S.; Kawamorita, S.; Maxwell, A. C.; Shukla, L.; Morris, J.; Lin, Z.; Marder, T. B.; Steel, P. G. *Chem. Sci.* **2012**, *3*, 3505.
6. Iwashita, M.; Fujii, S.; Ito, S.; Hirano, T.; Kagechika, H. *Tetrahedron* **2011**, *67*, 6073–6082.
7. Kawamorita, S.; Ohmiya, H.; Sawamura, M. *J. Org. Chem.* **2010**, *75*, 3855–3858.
- 8a. Kawamorita, S.; Miyzaki, T.; Ohmiya, H.; Iwai, T.; Sawamura, M. *J. Am. Chem. Soc.* **2011**, *133*, 19310–19313. 8b. Ros, A.; Estepa, B.; Lopez-Rodriguez, R.; Alvarez, E.; Fernandez, R.; Lassaletta, J. M. *Angew. Chem.-Int. Edit.* **2011**, *50*, 11724.
9. Itoh, H.; Kikuchi, T.; Ishiyama, T.; Miyaura, N. *Chem. Lett.* **2011**, *40*, 1007.

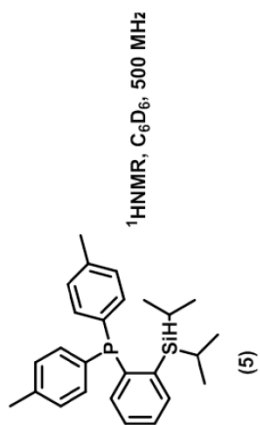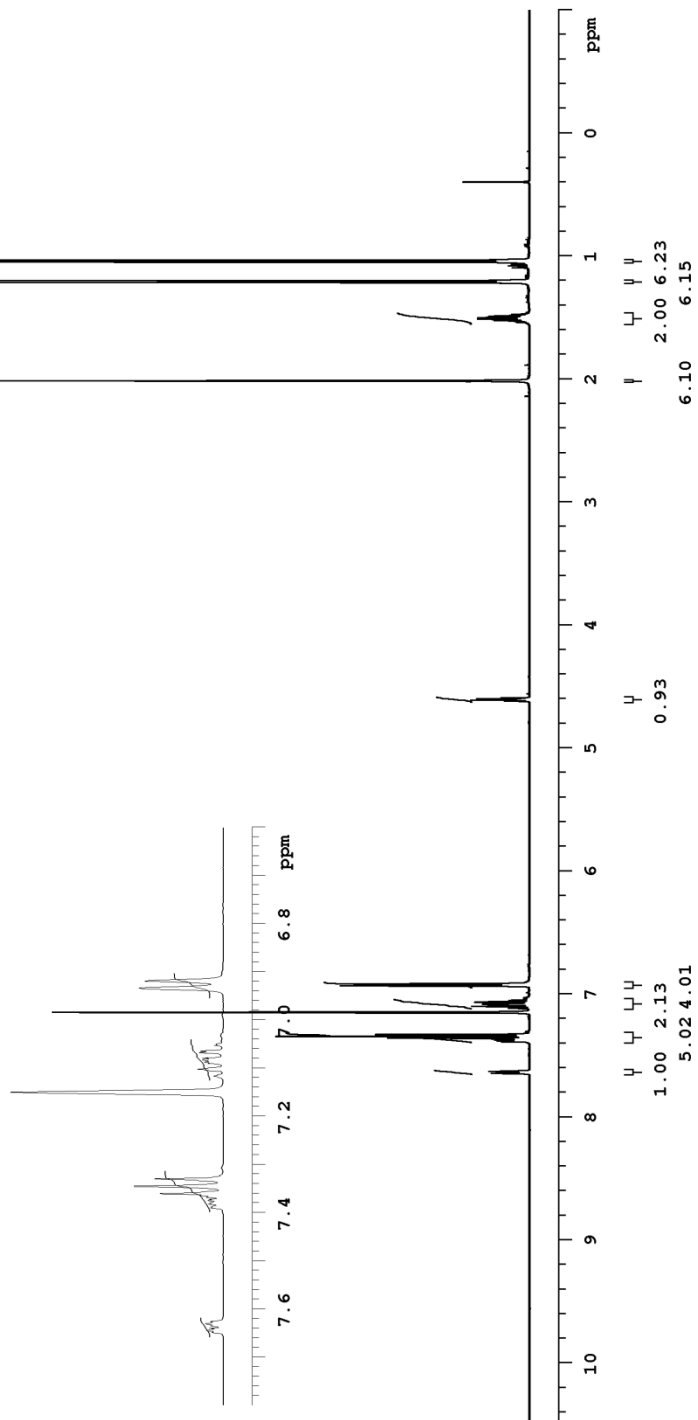



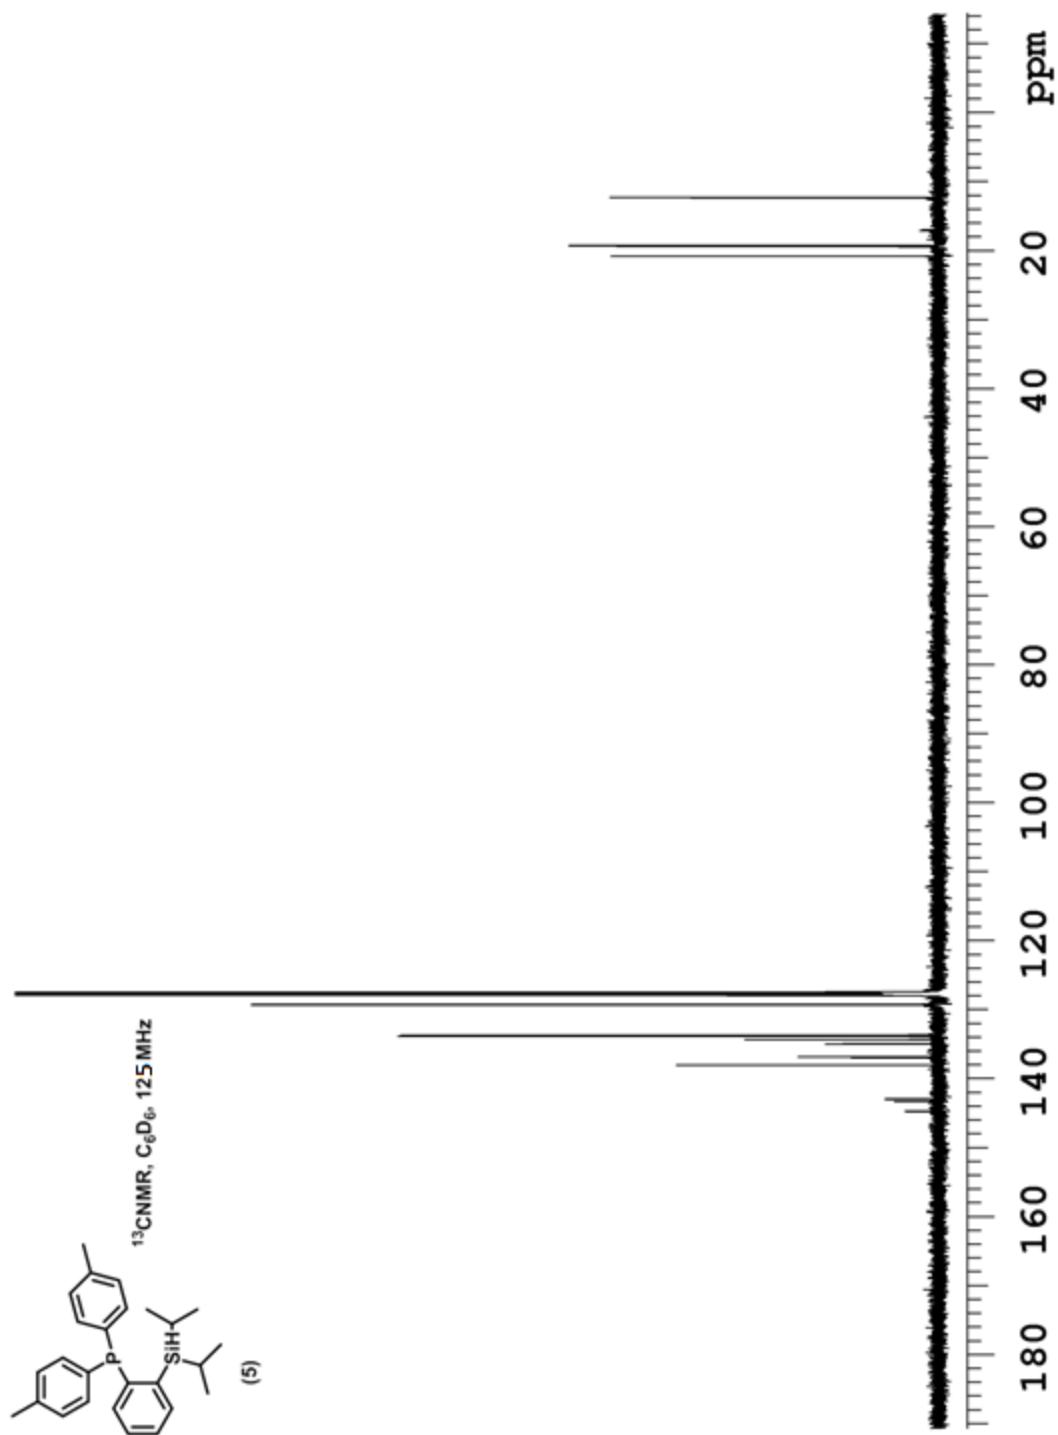

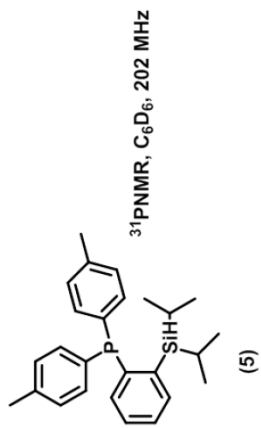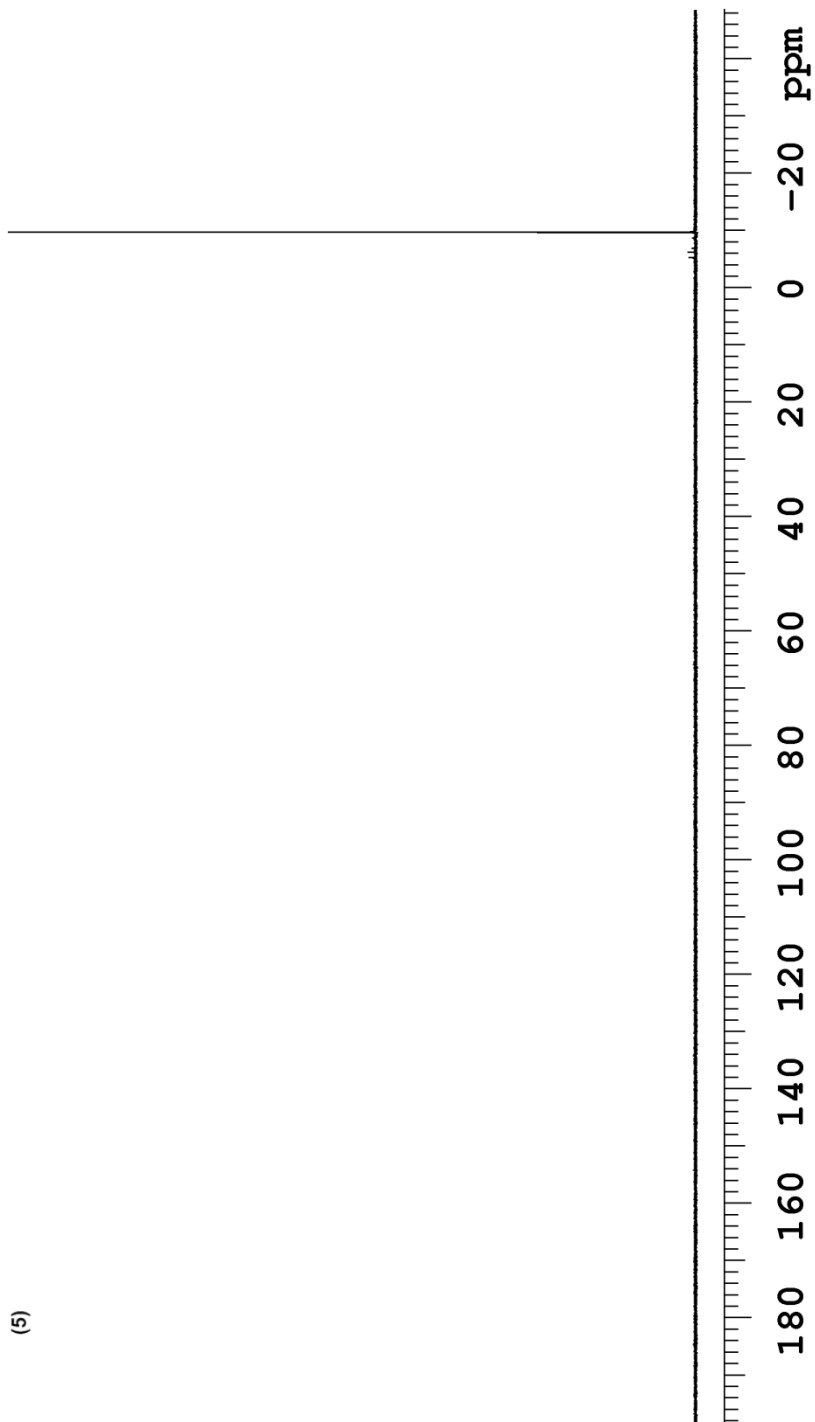

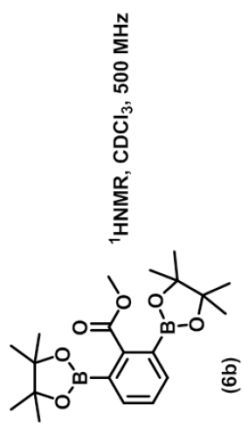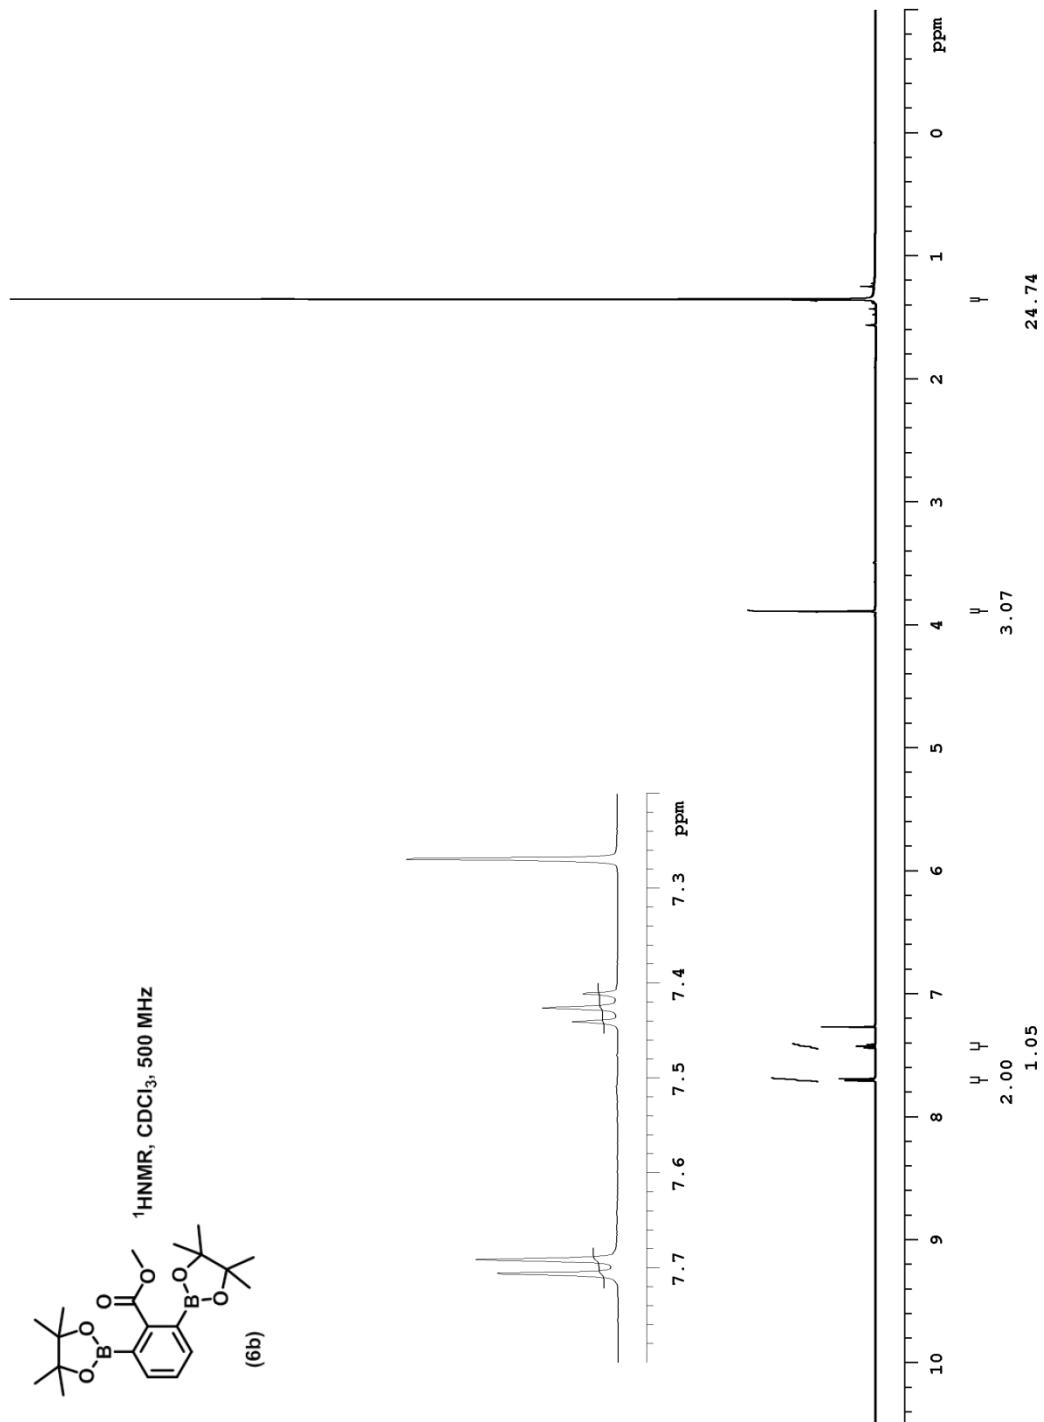

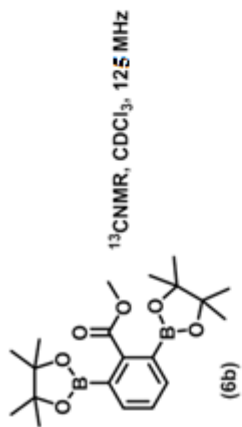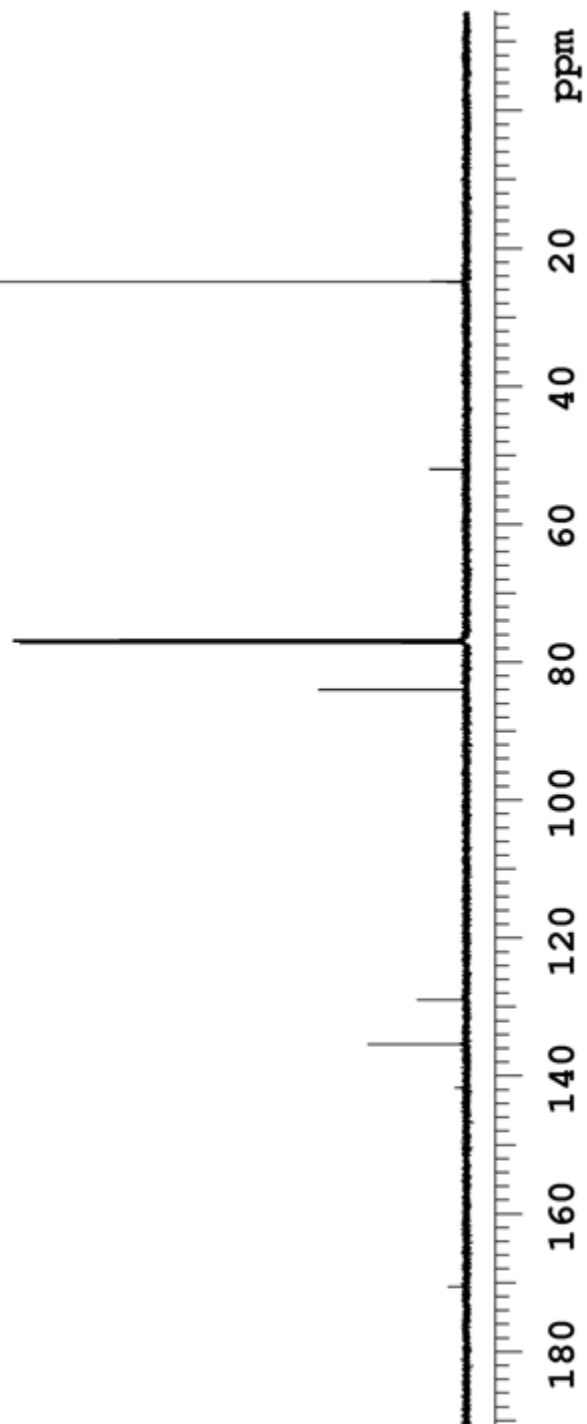

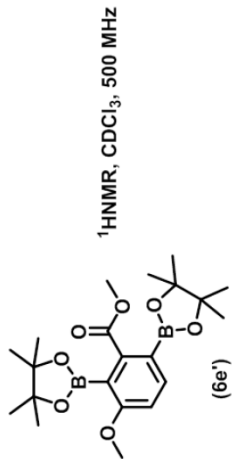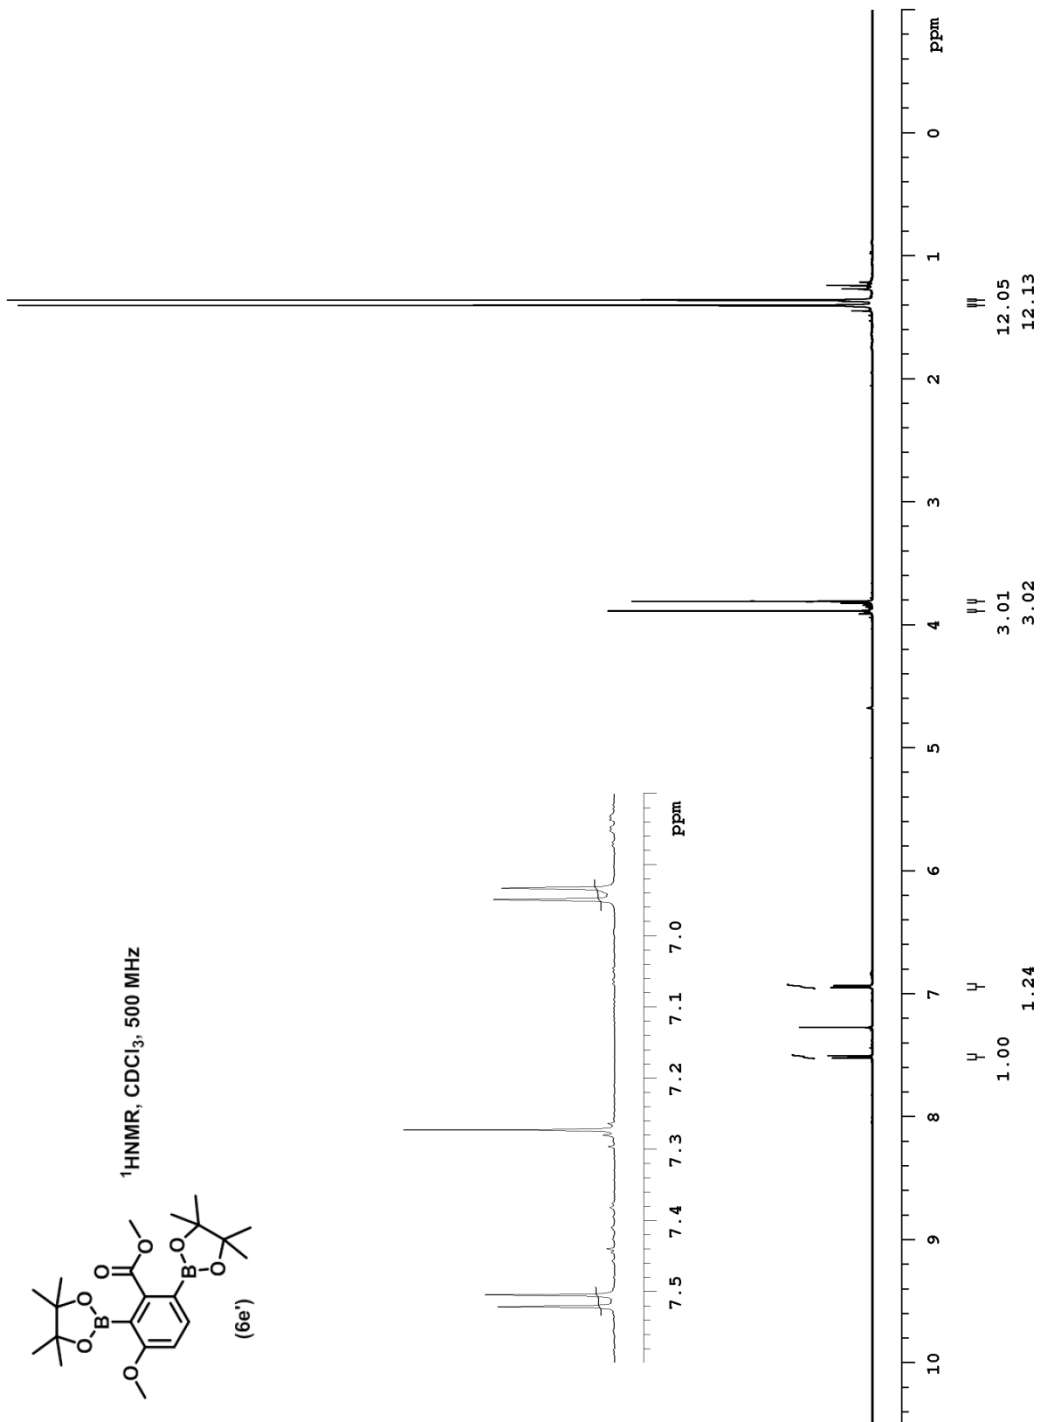

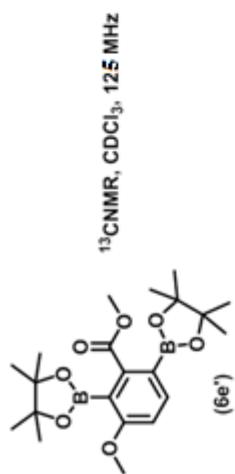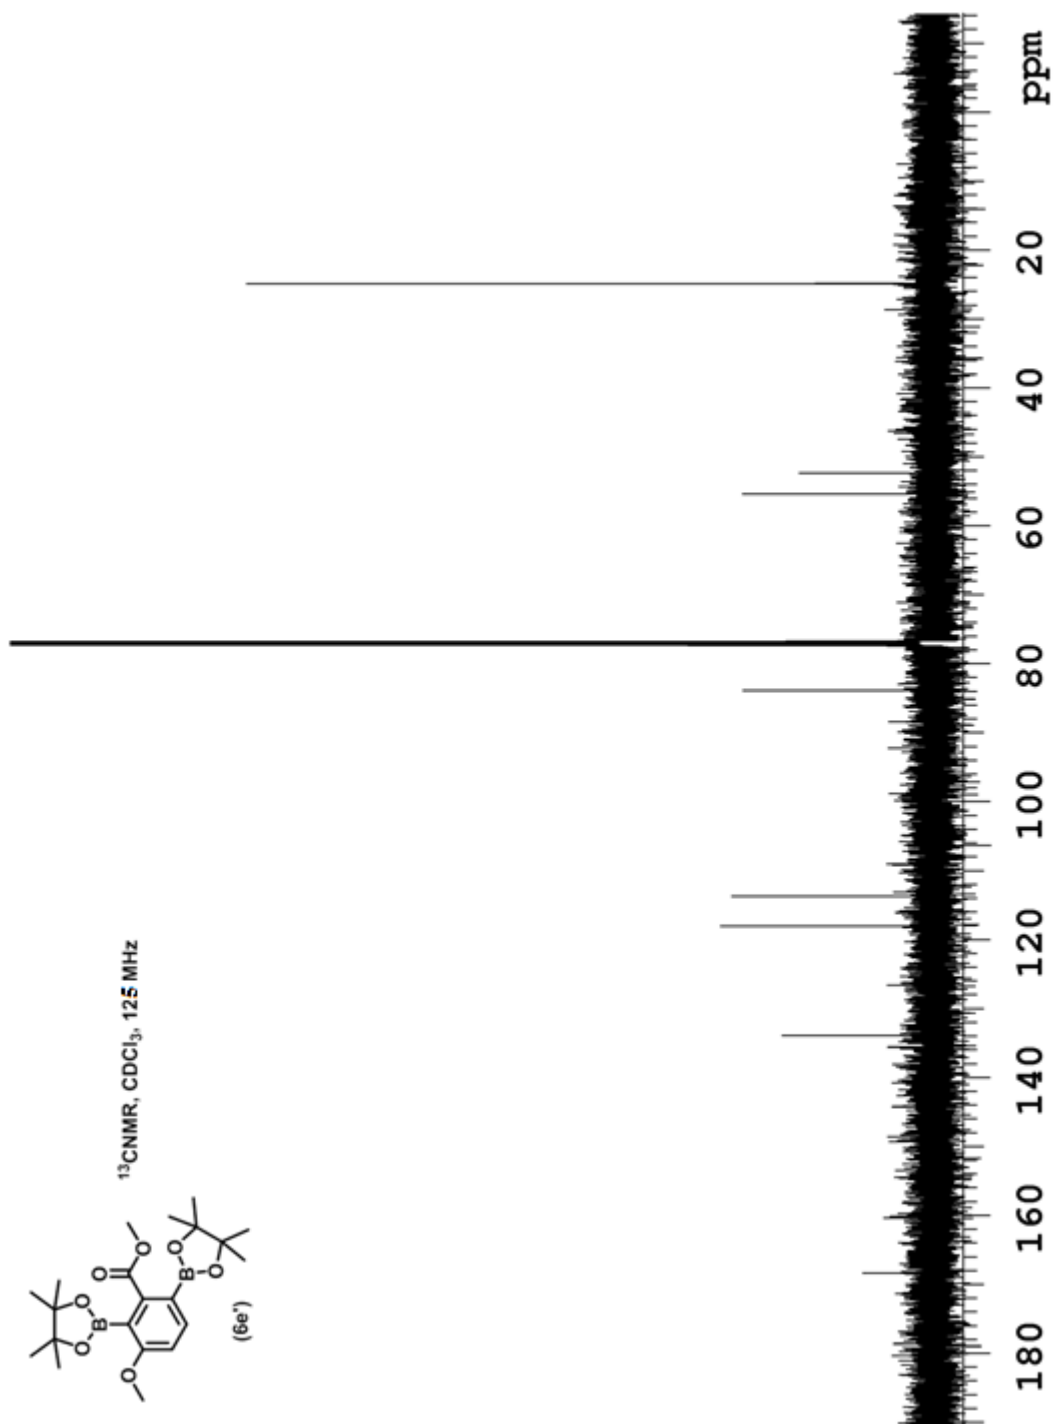

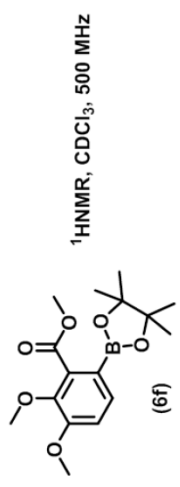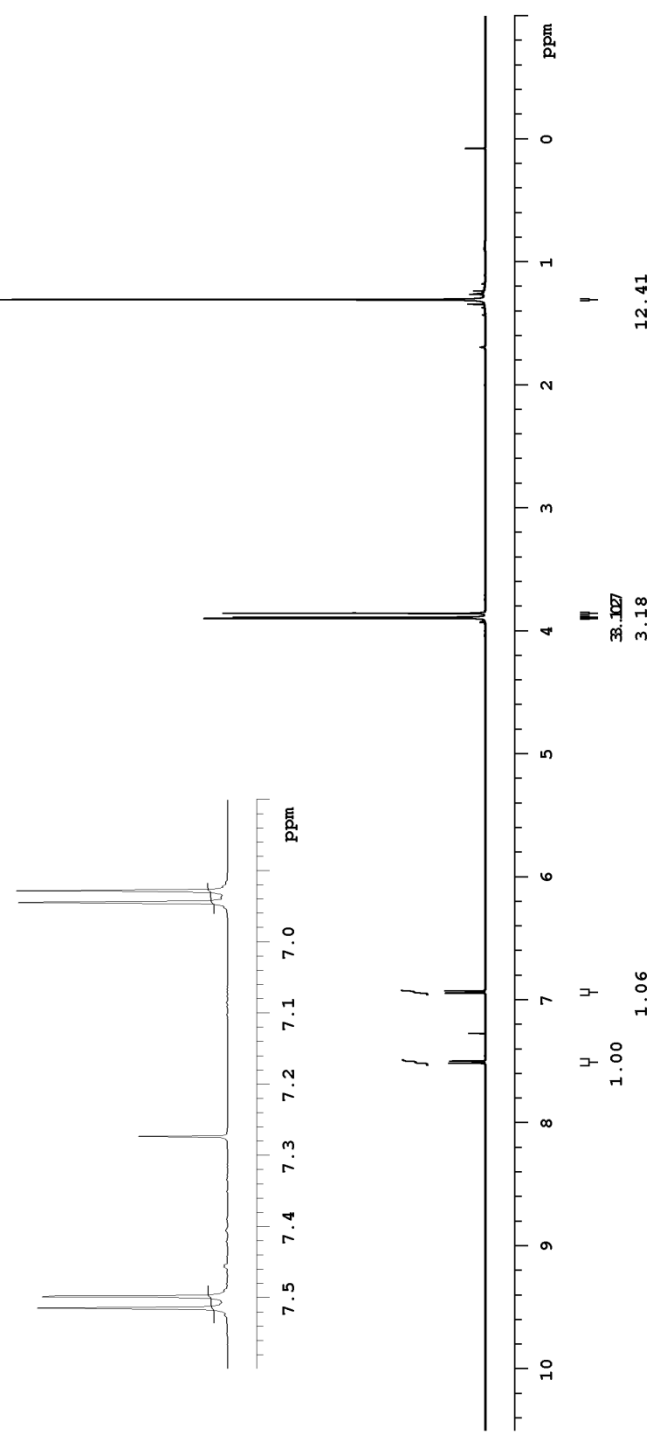

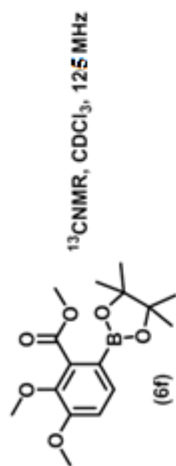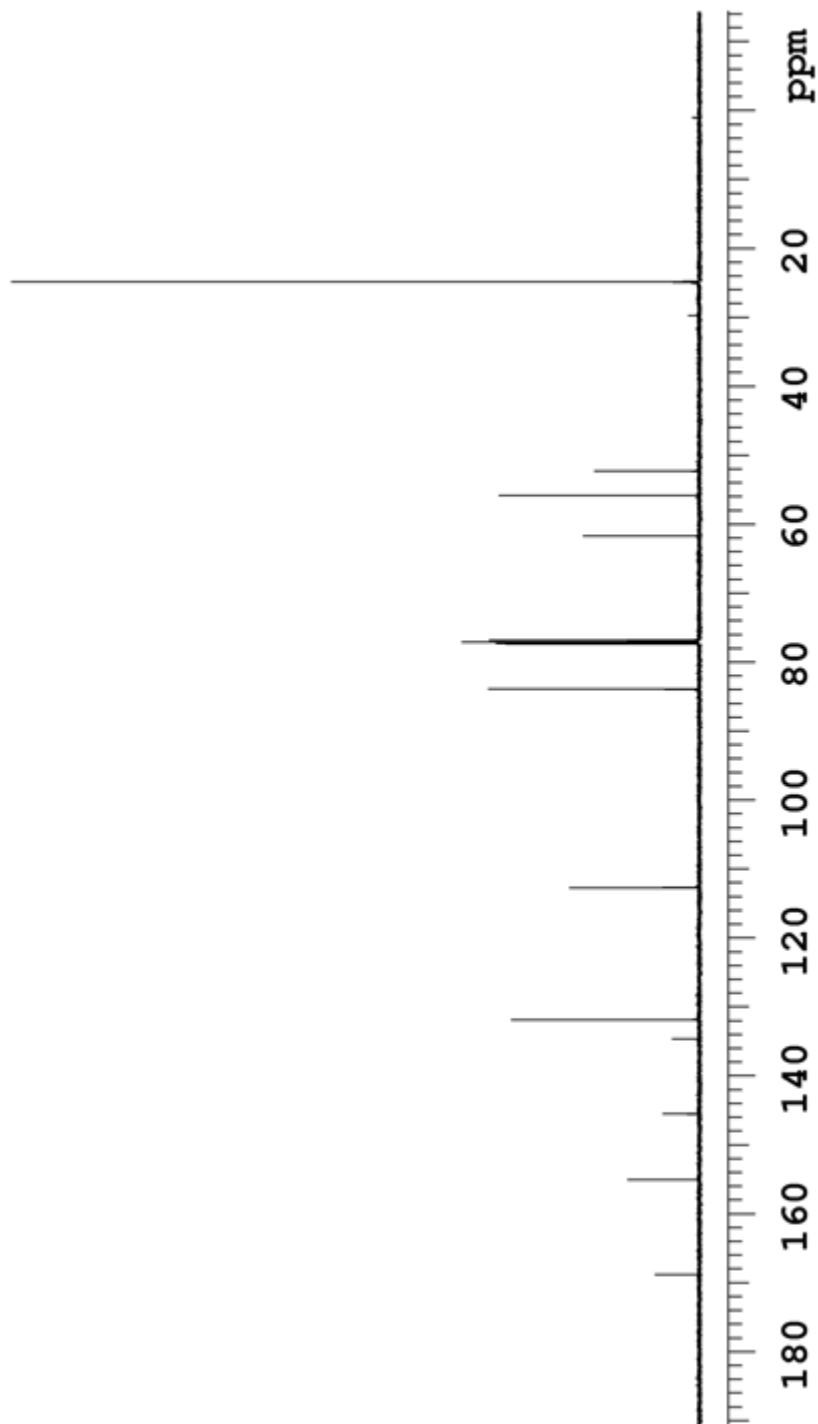



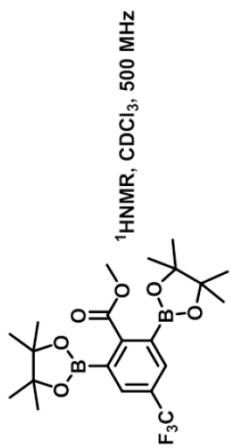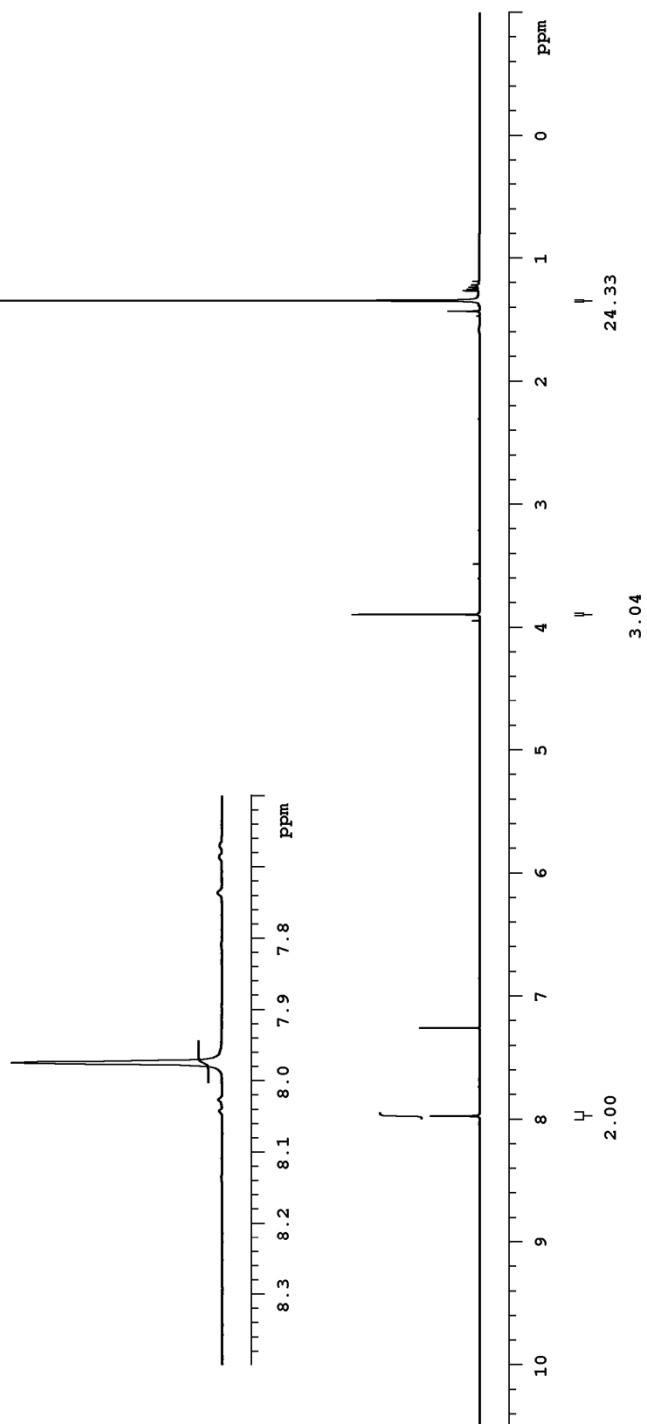

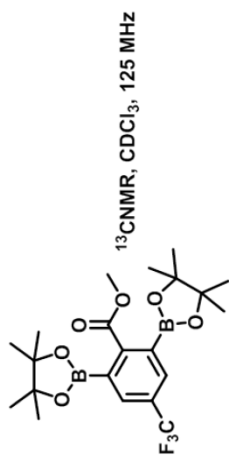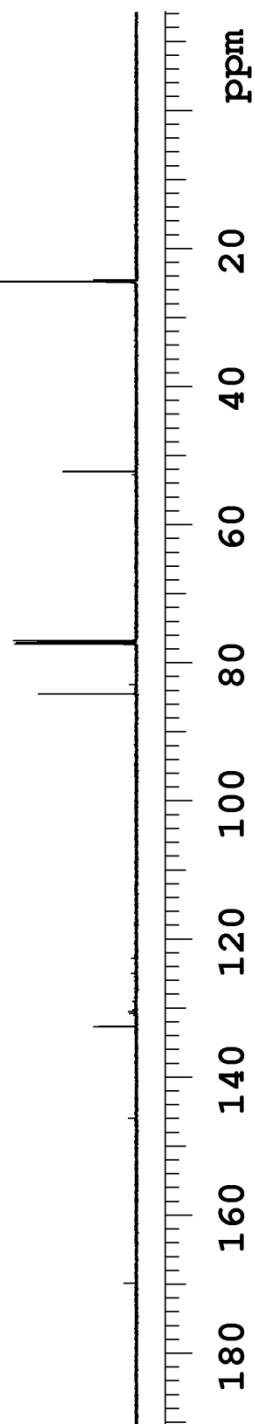

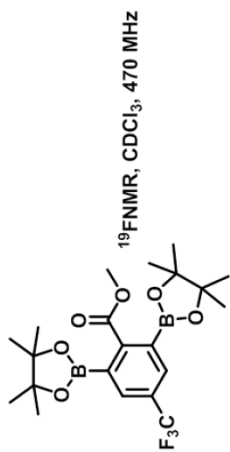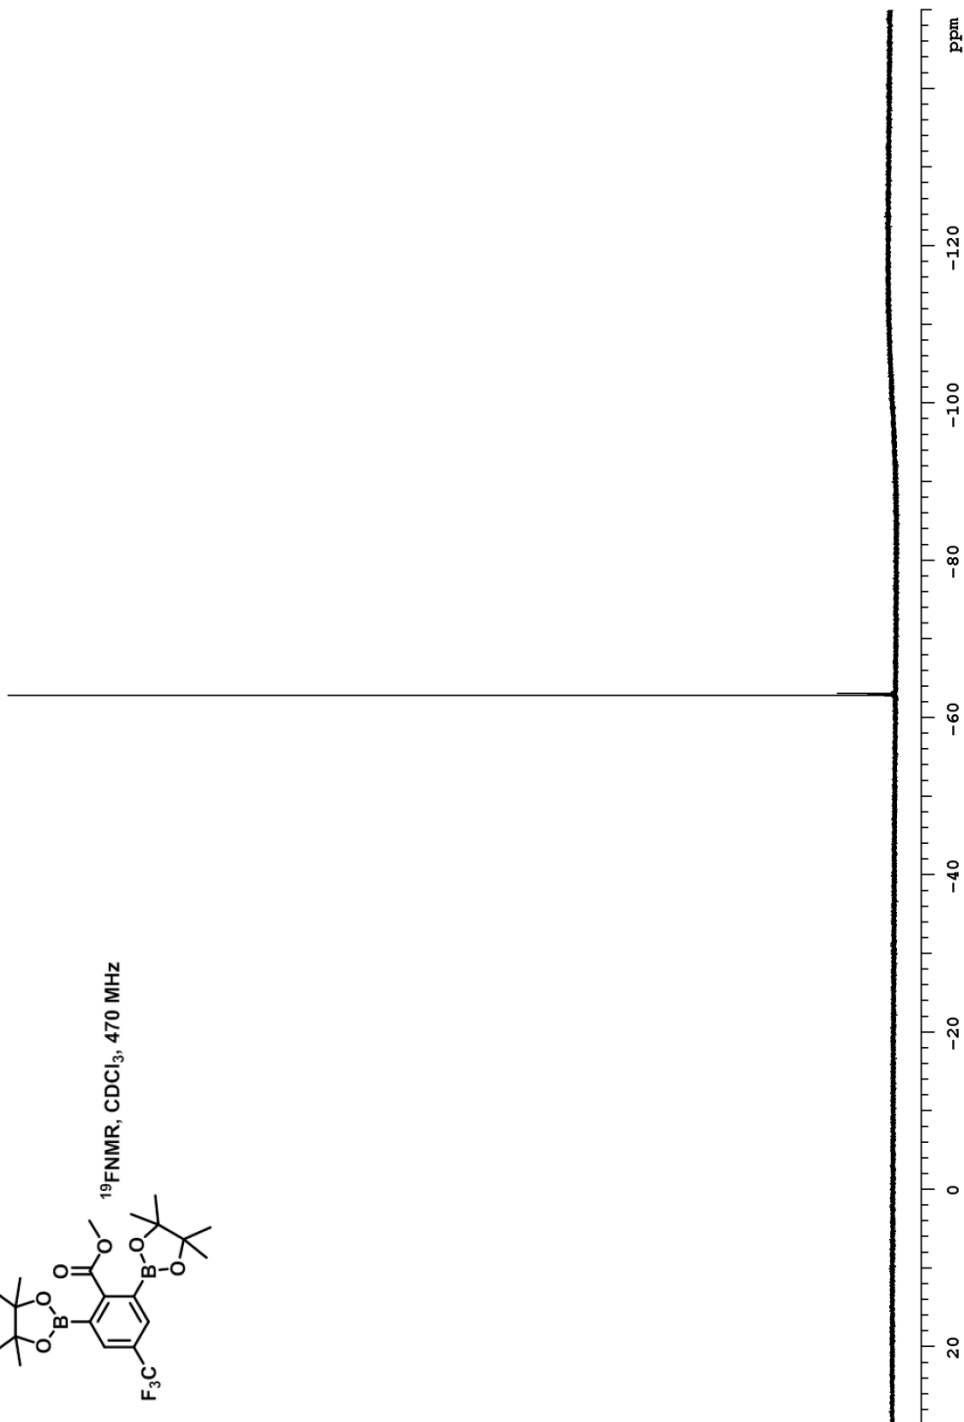

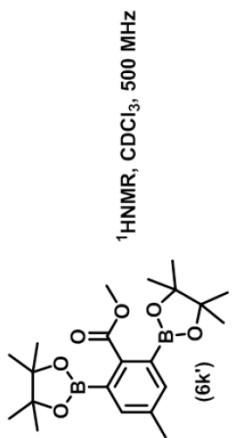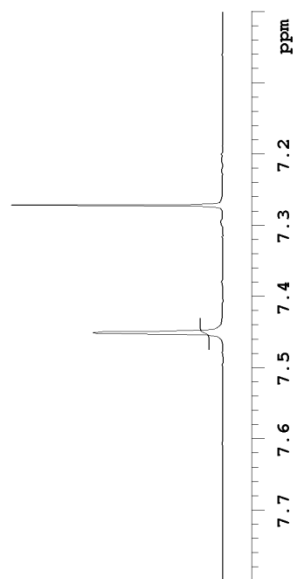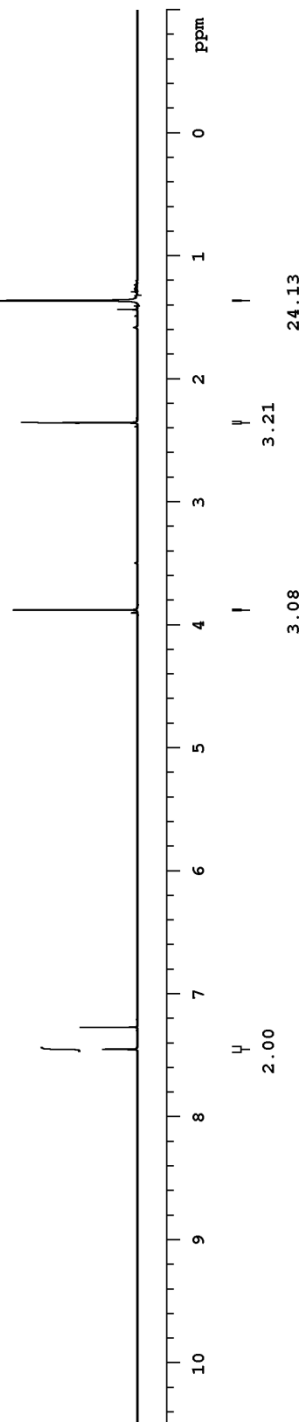

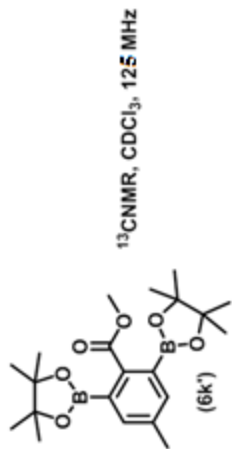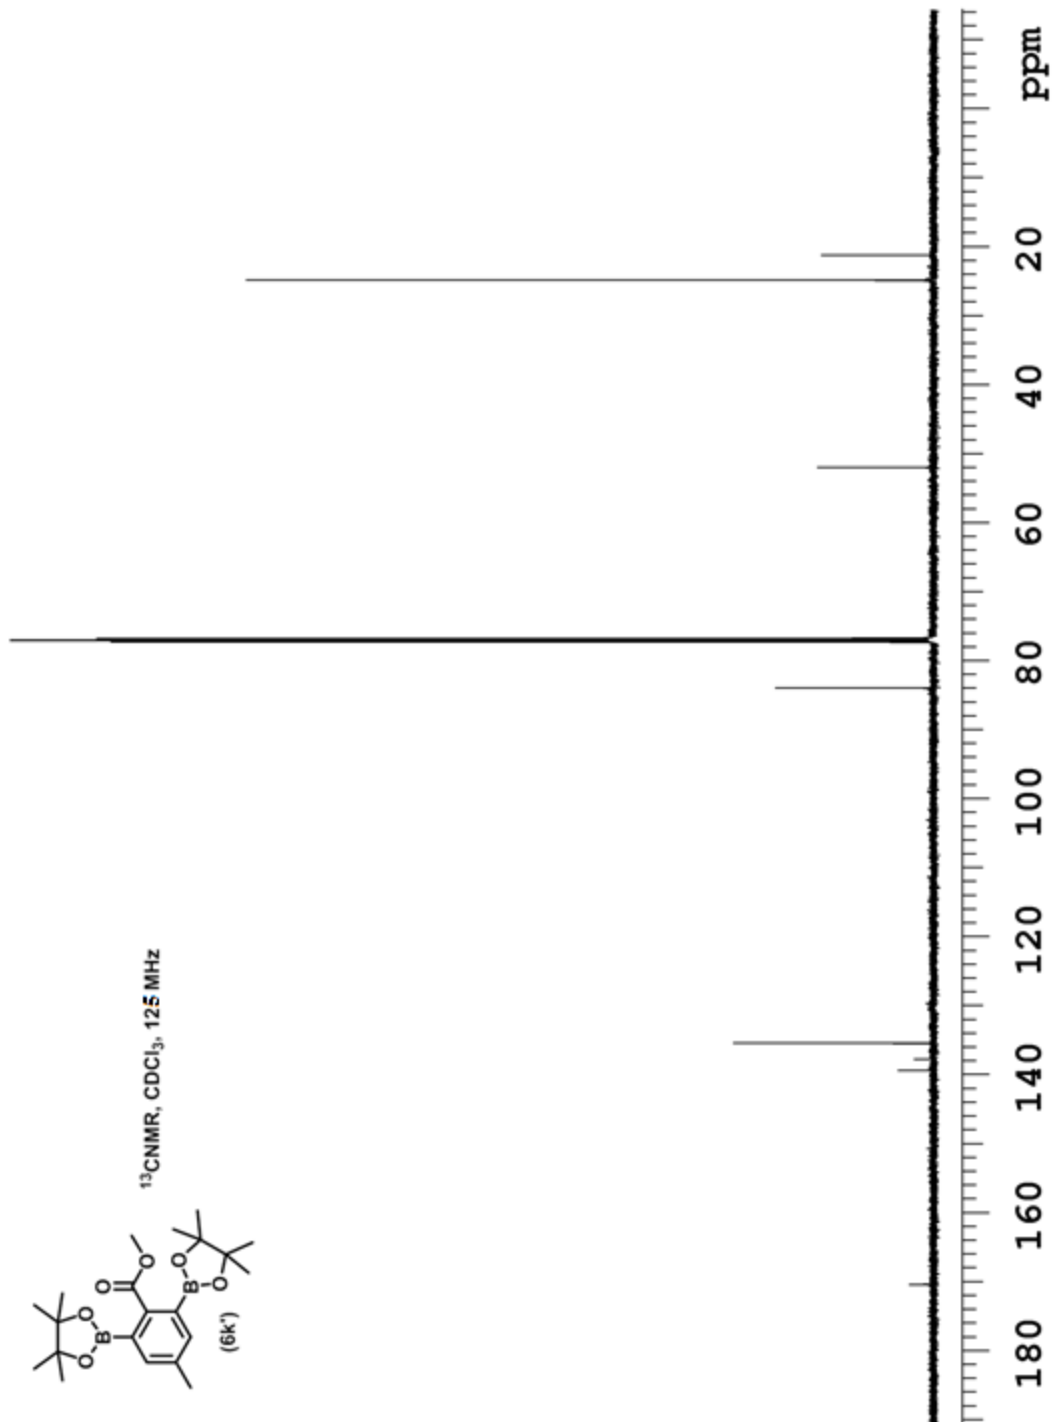

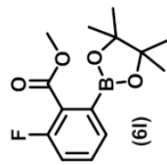

<sup>1</sup>HNMR, CDCl<sub>3</sub>, 500 MHz

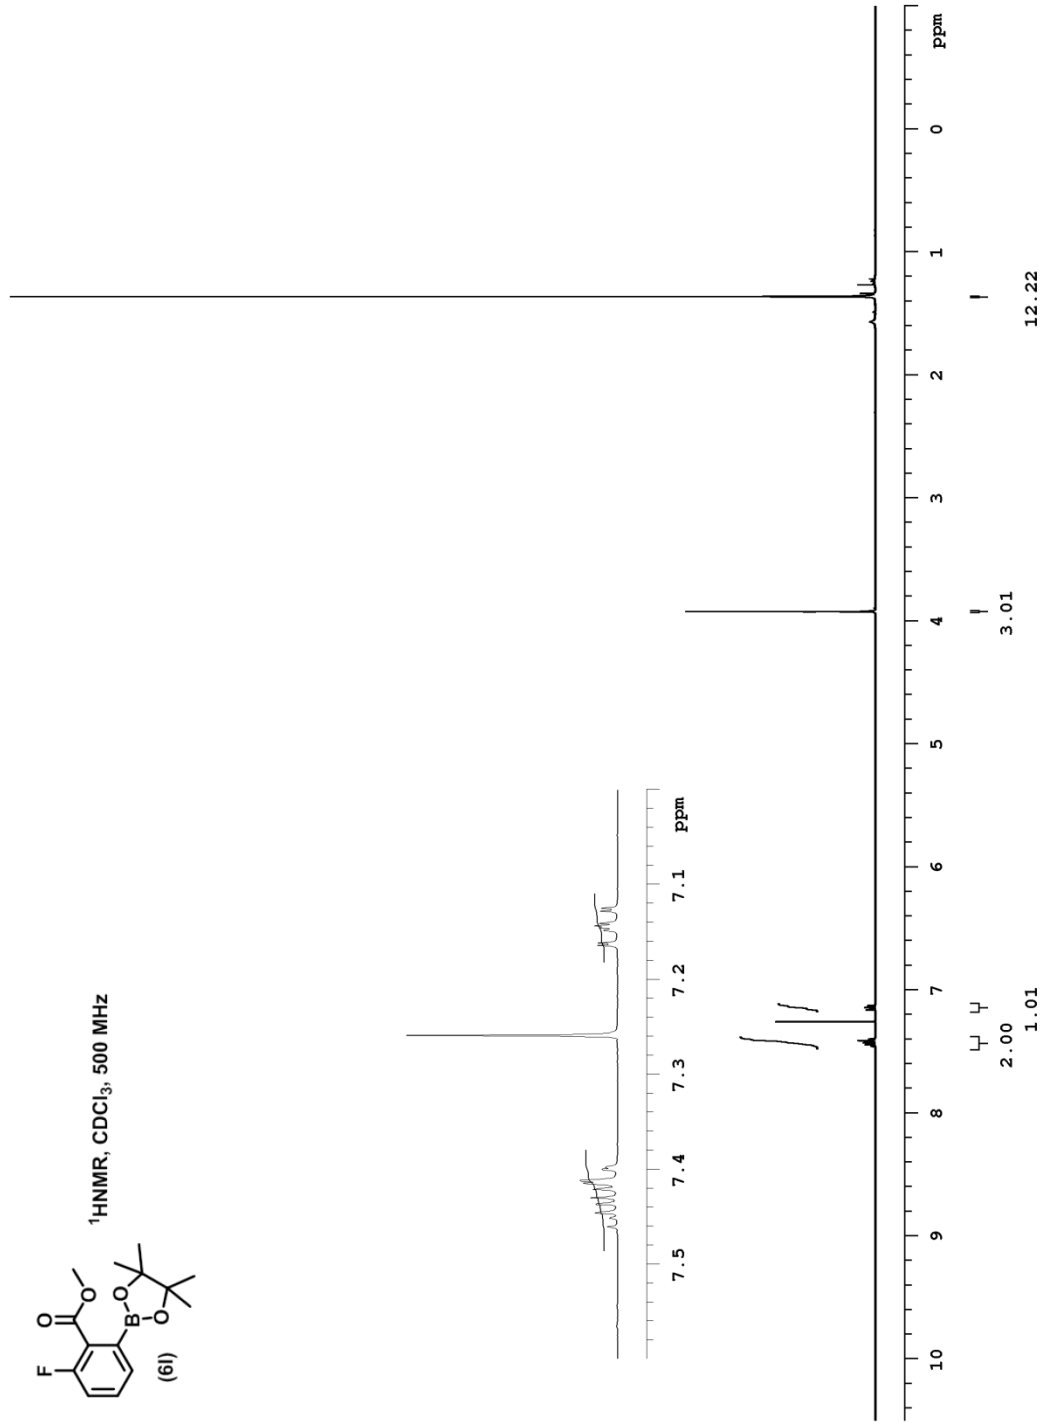

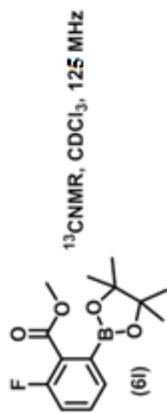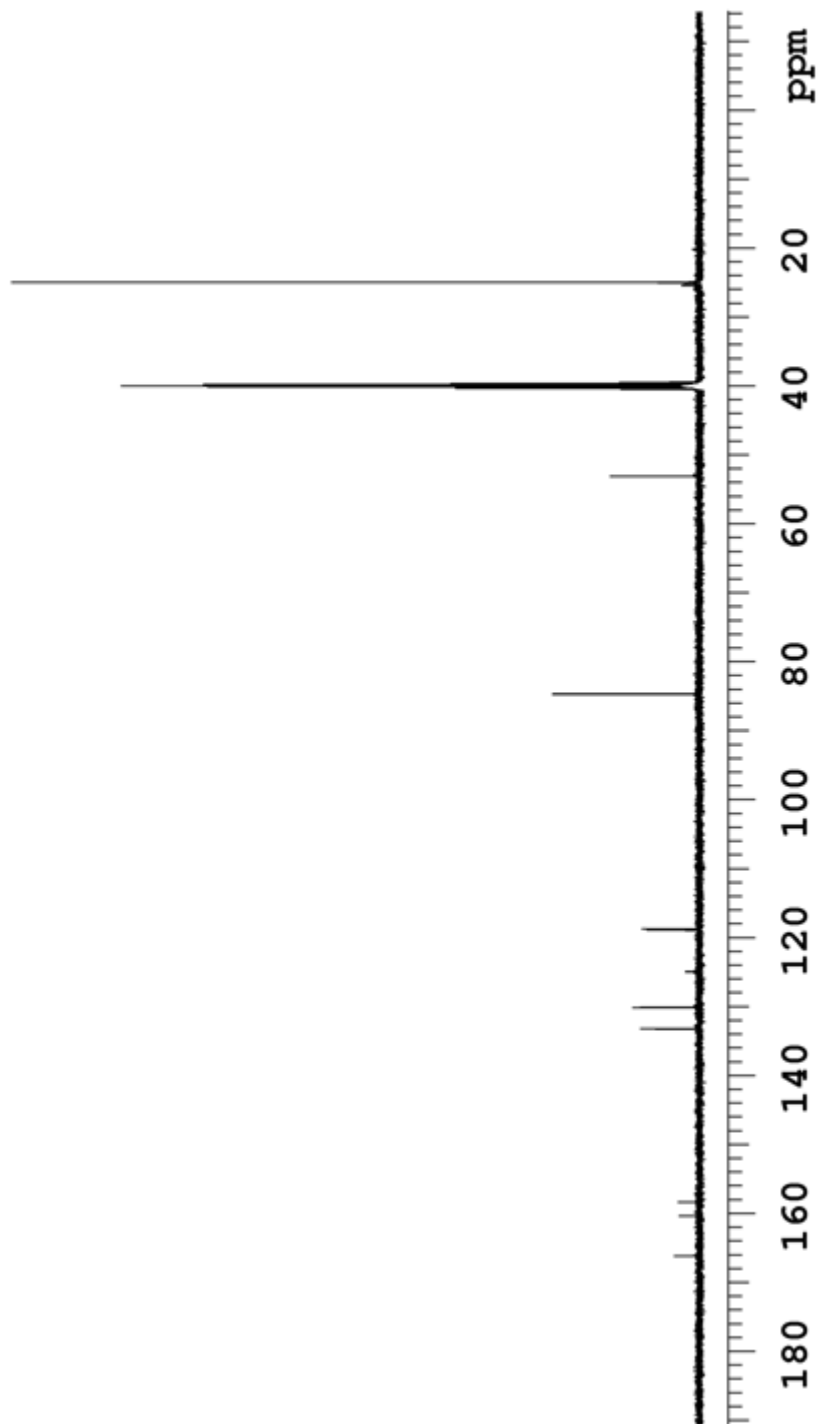

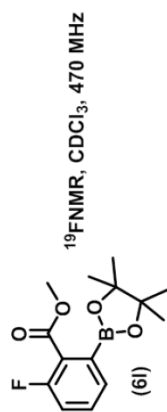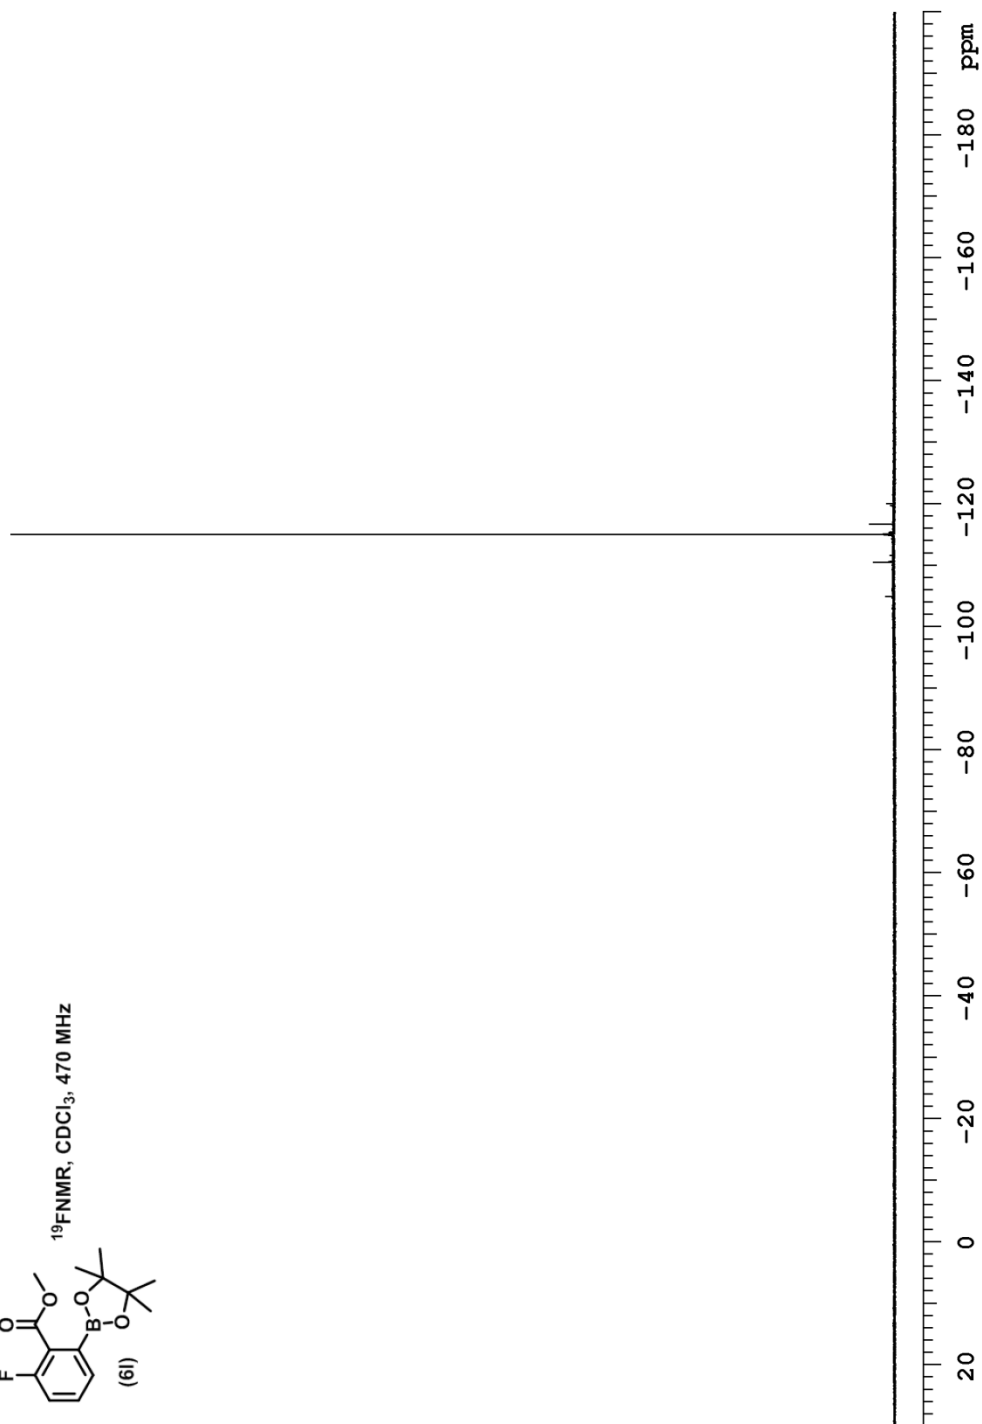



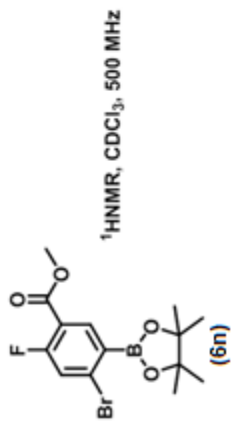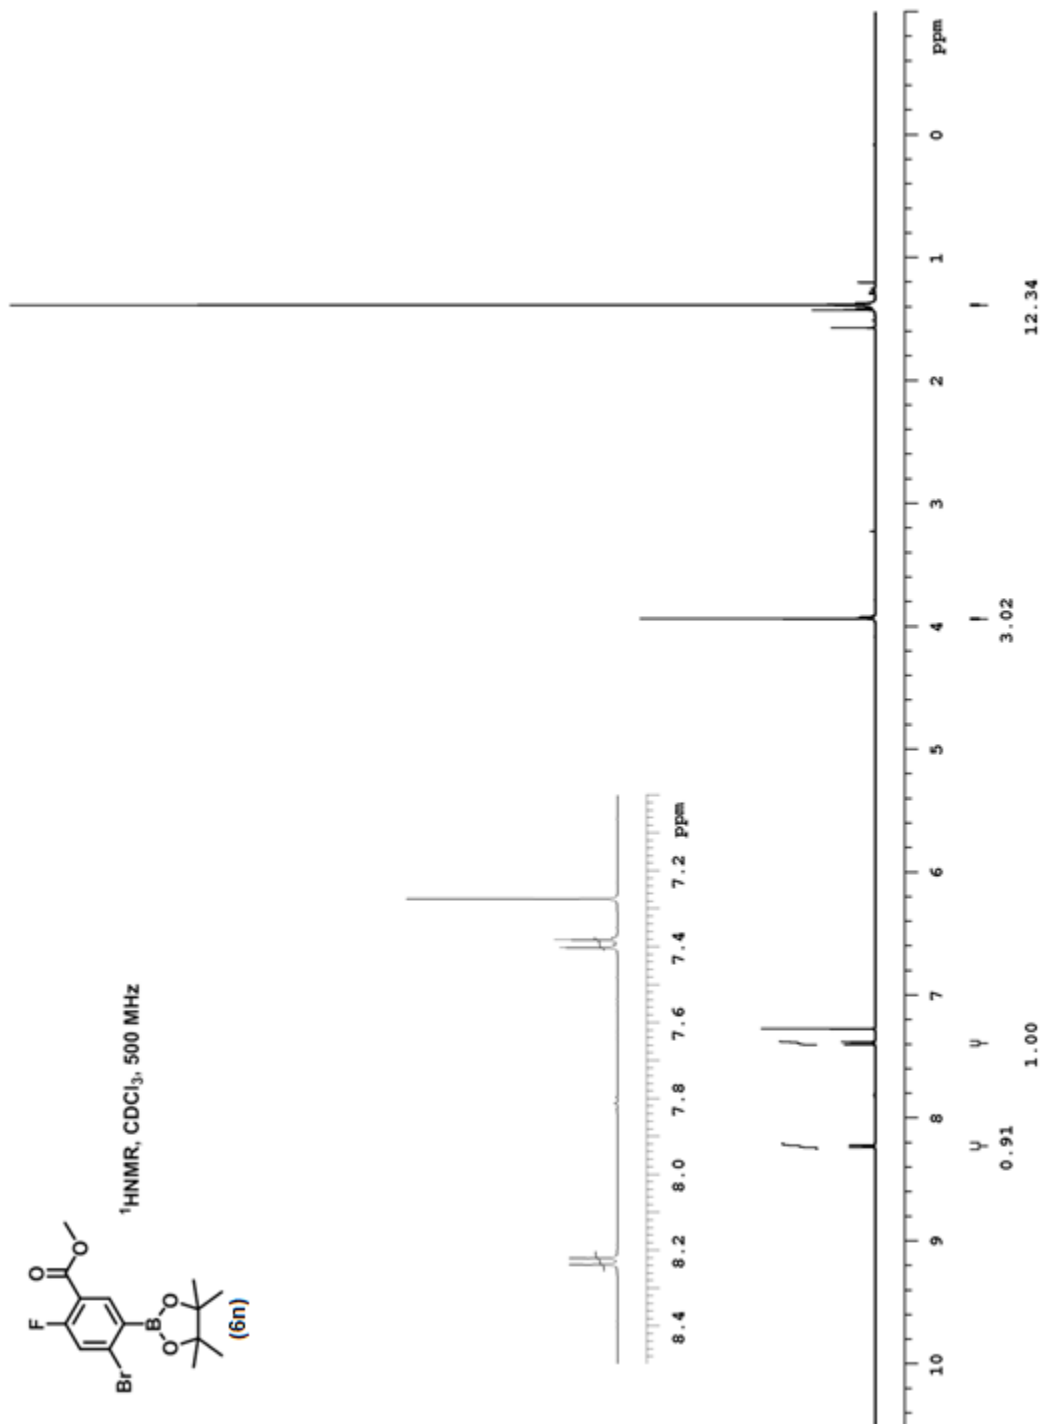

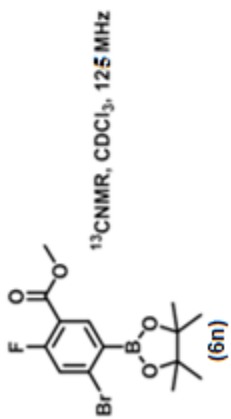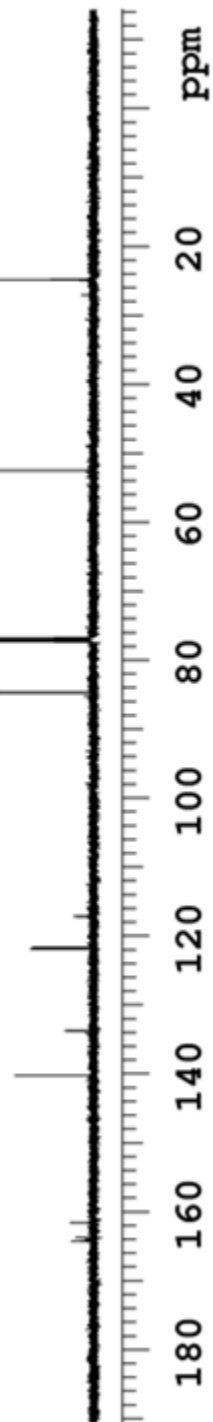

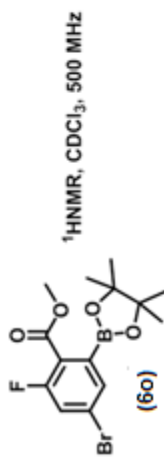

<sup>1</sup>H NMR, CDCl<sub>3</sub>, 500 MHz

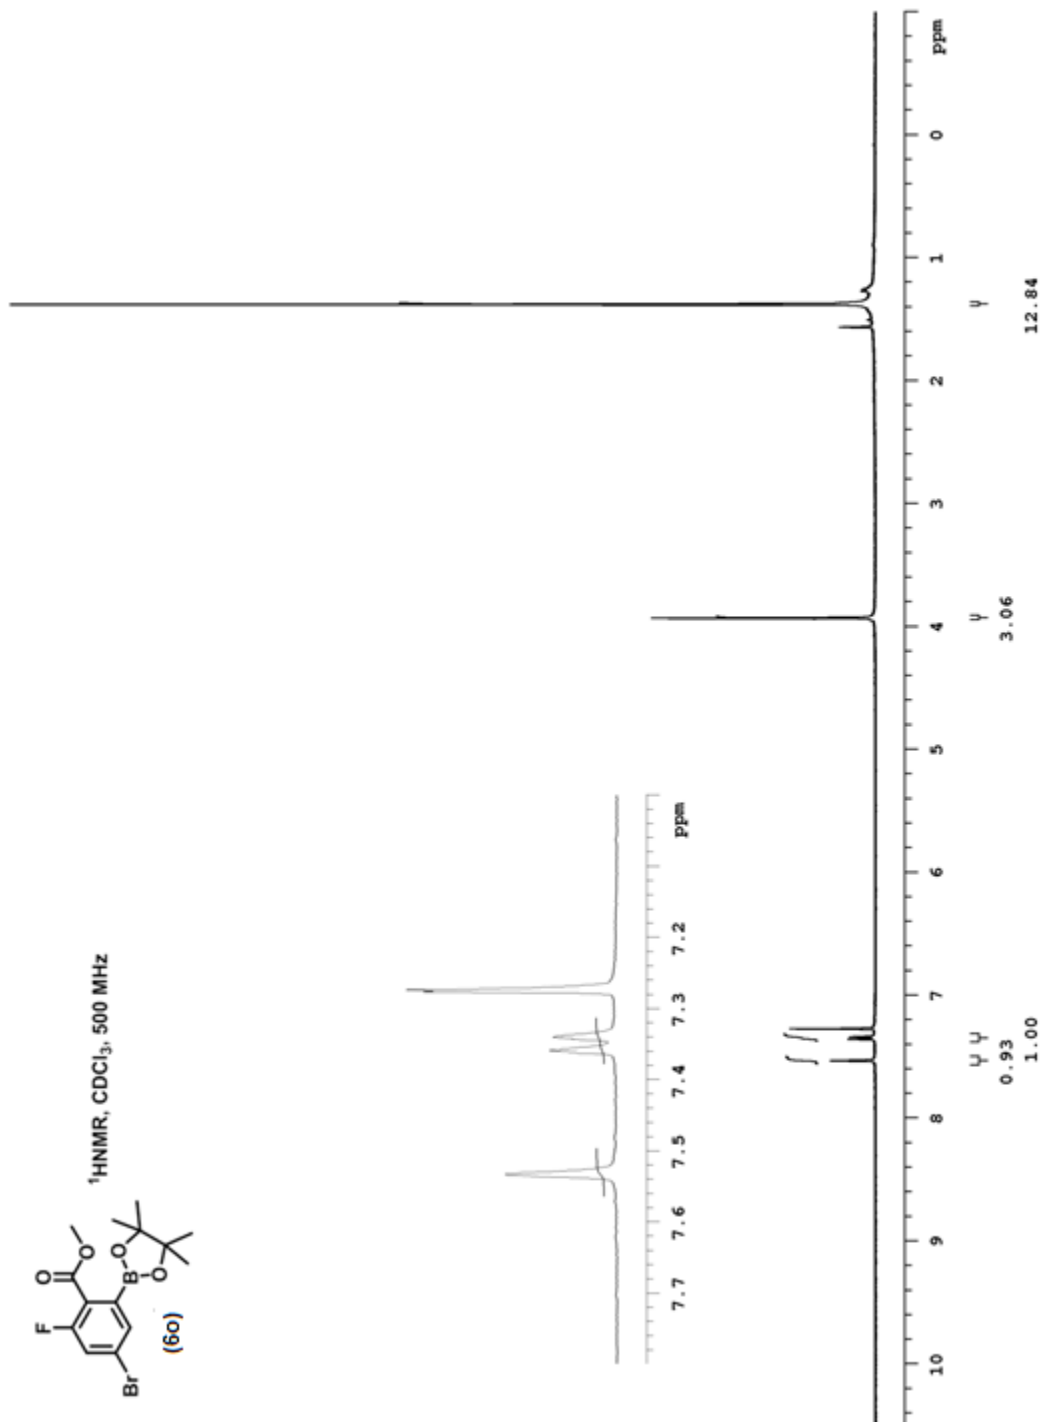

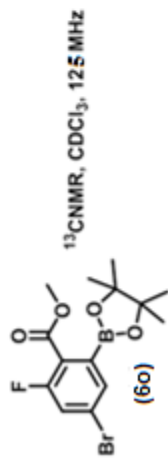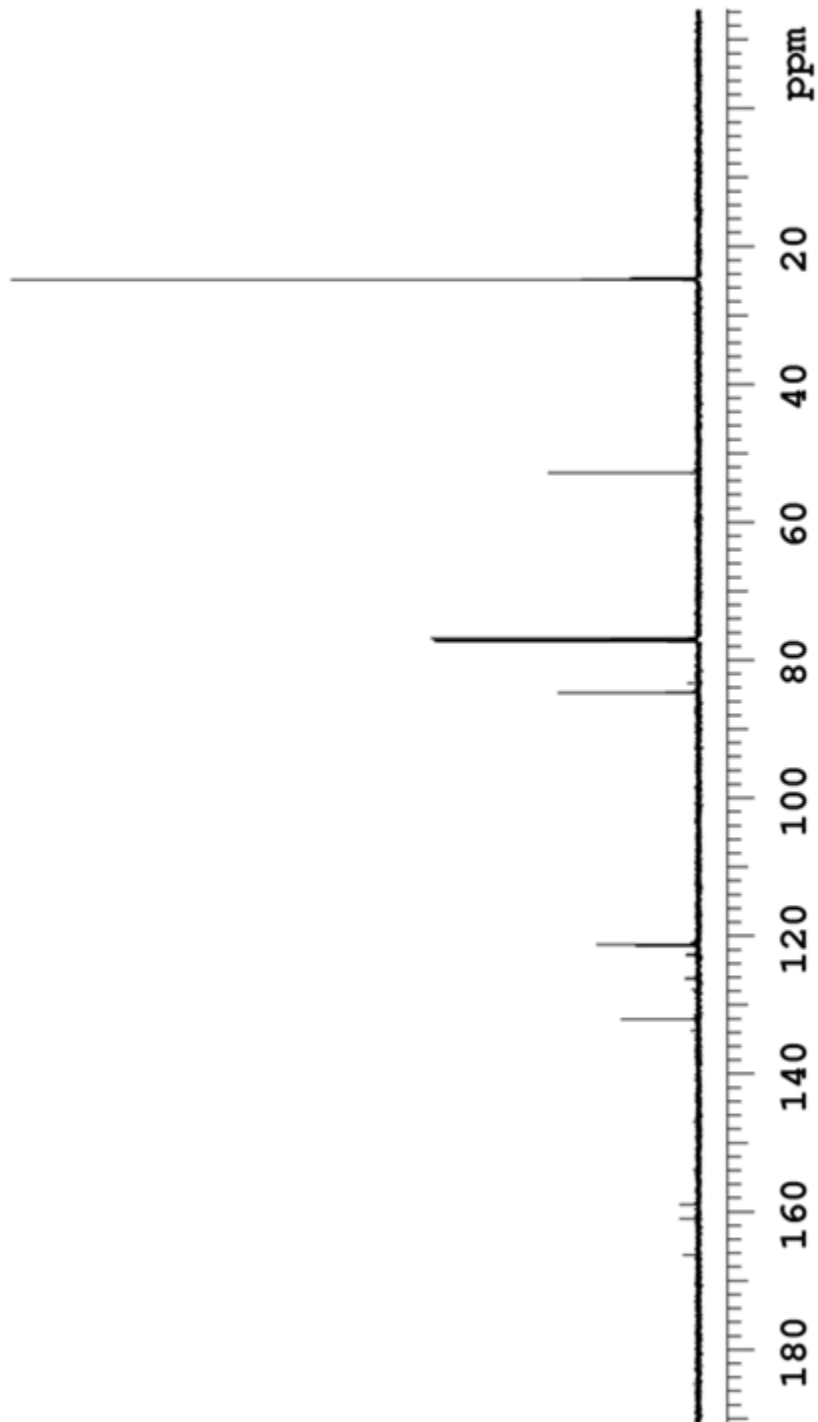

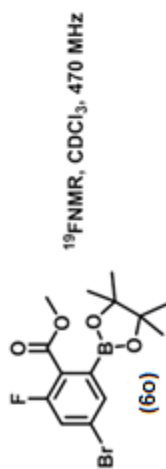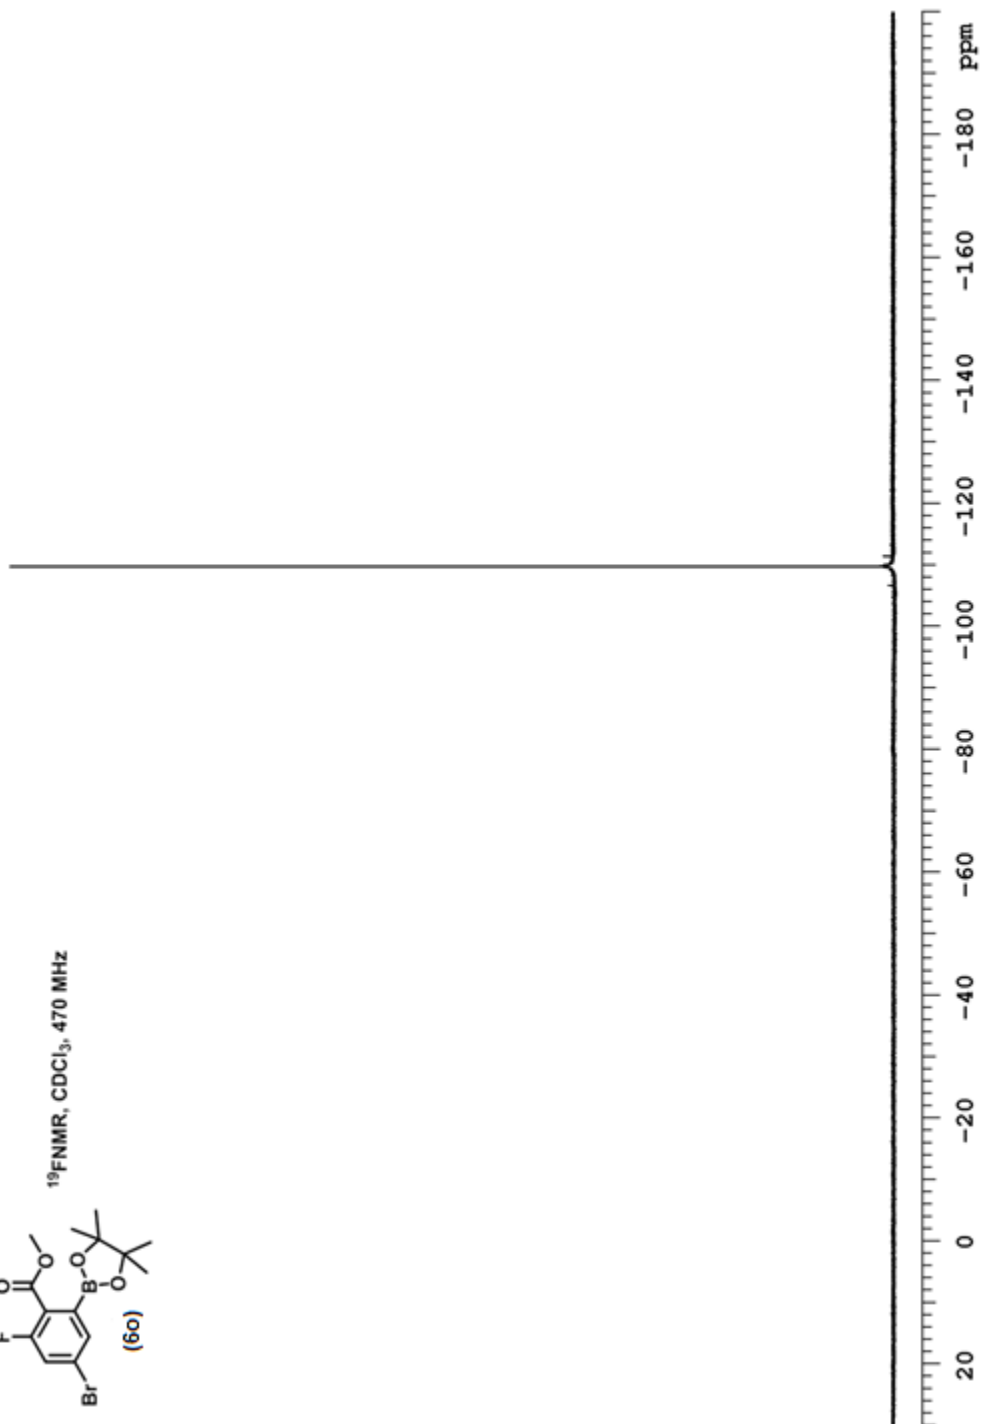

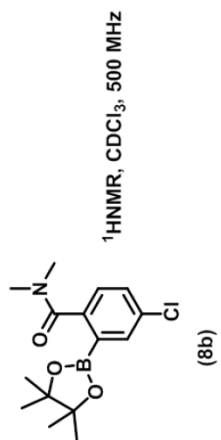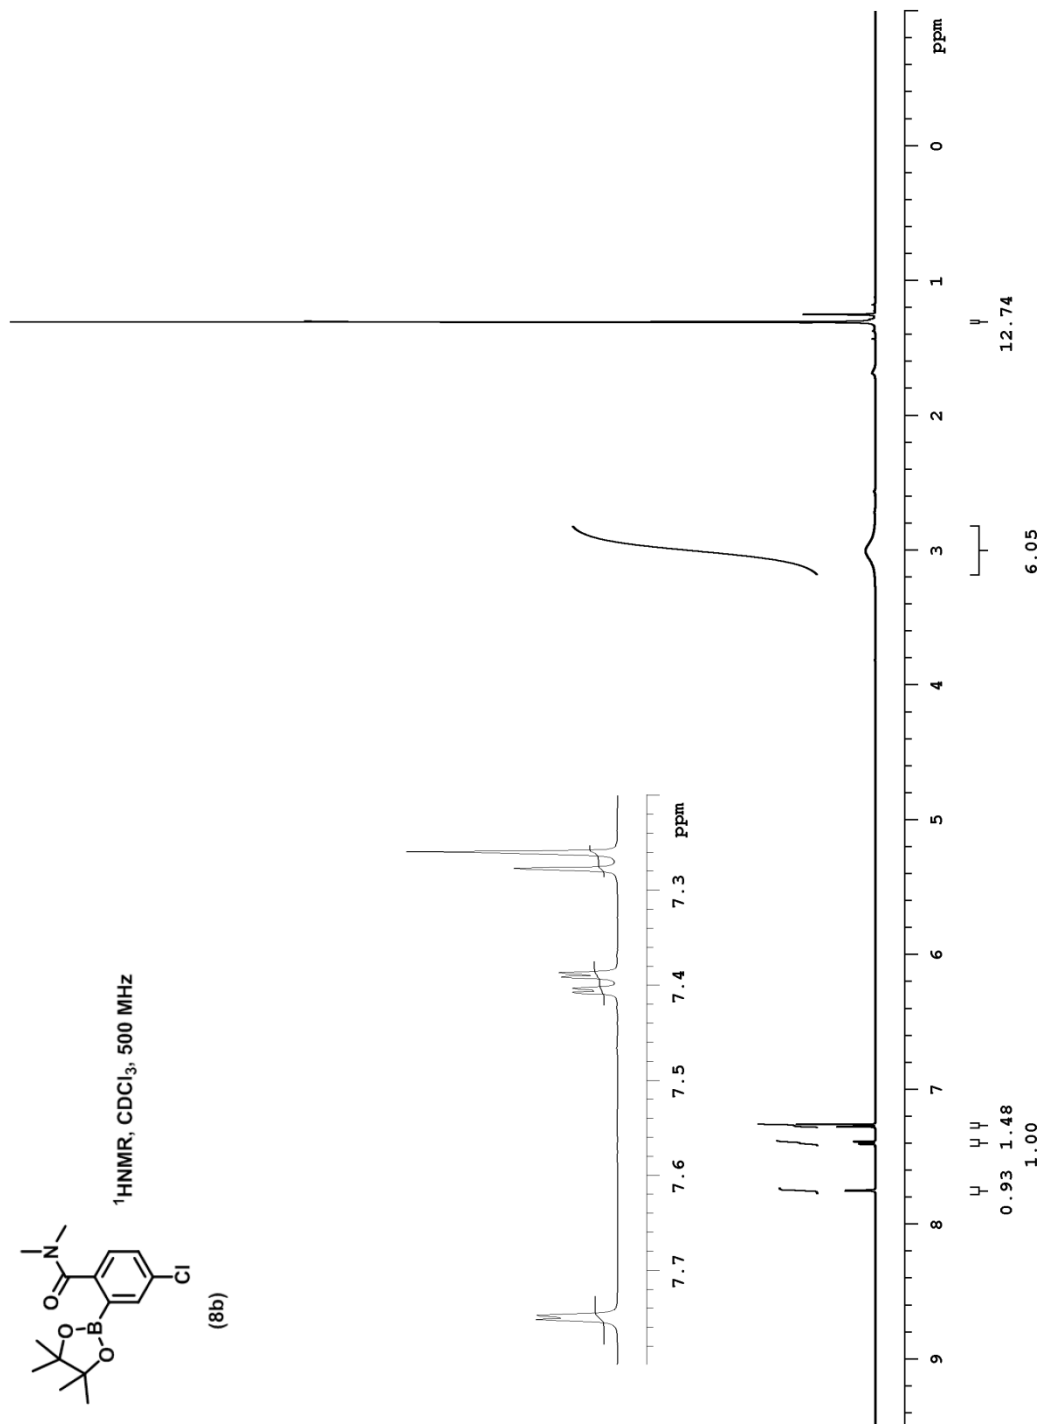

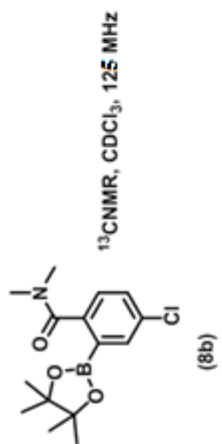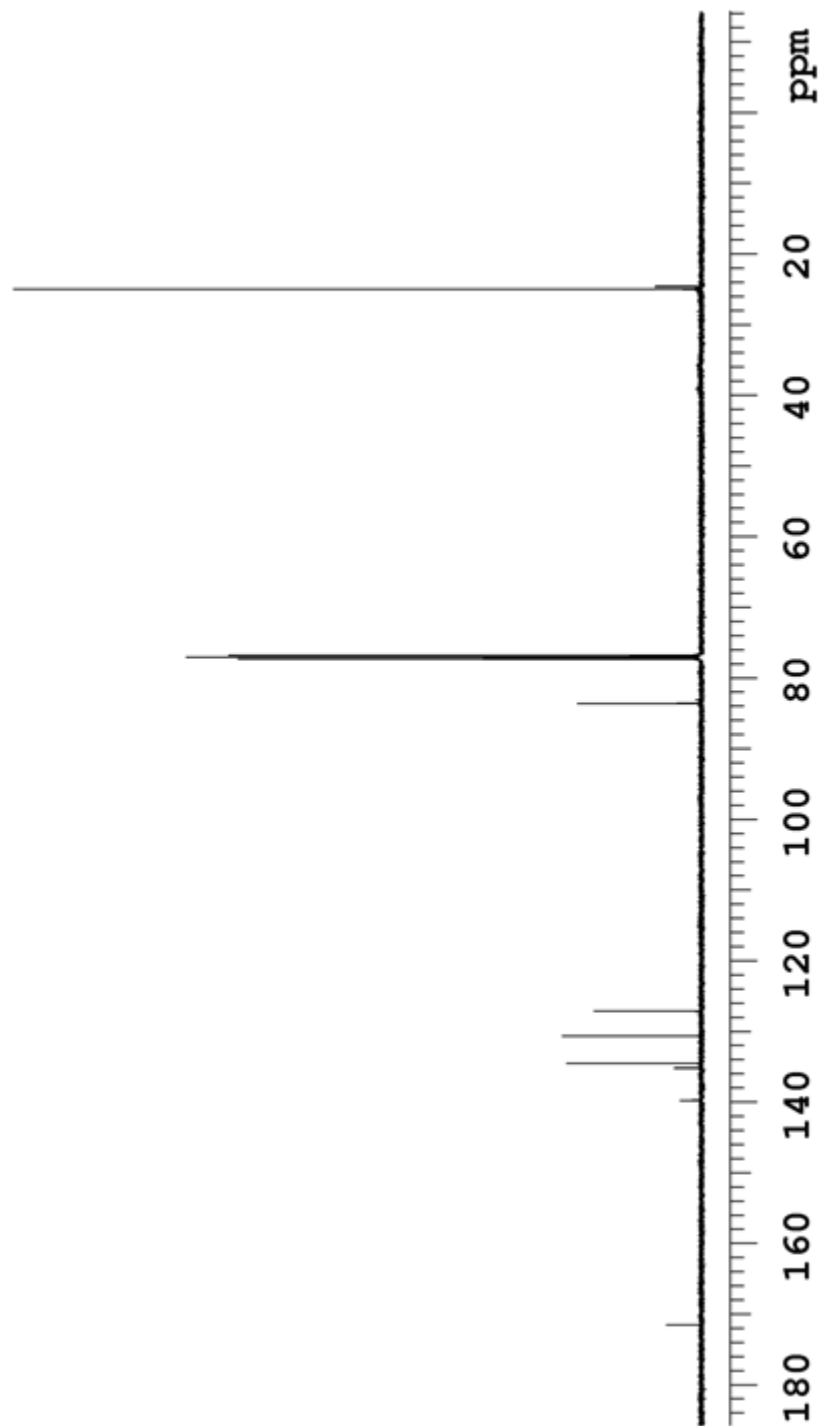

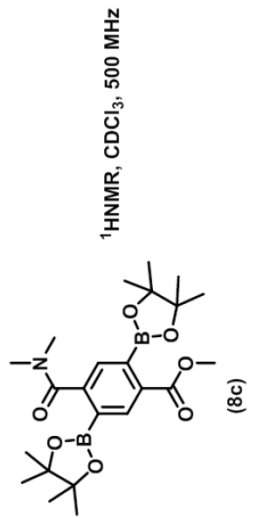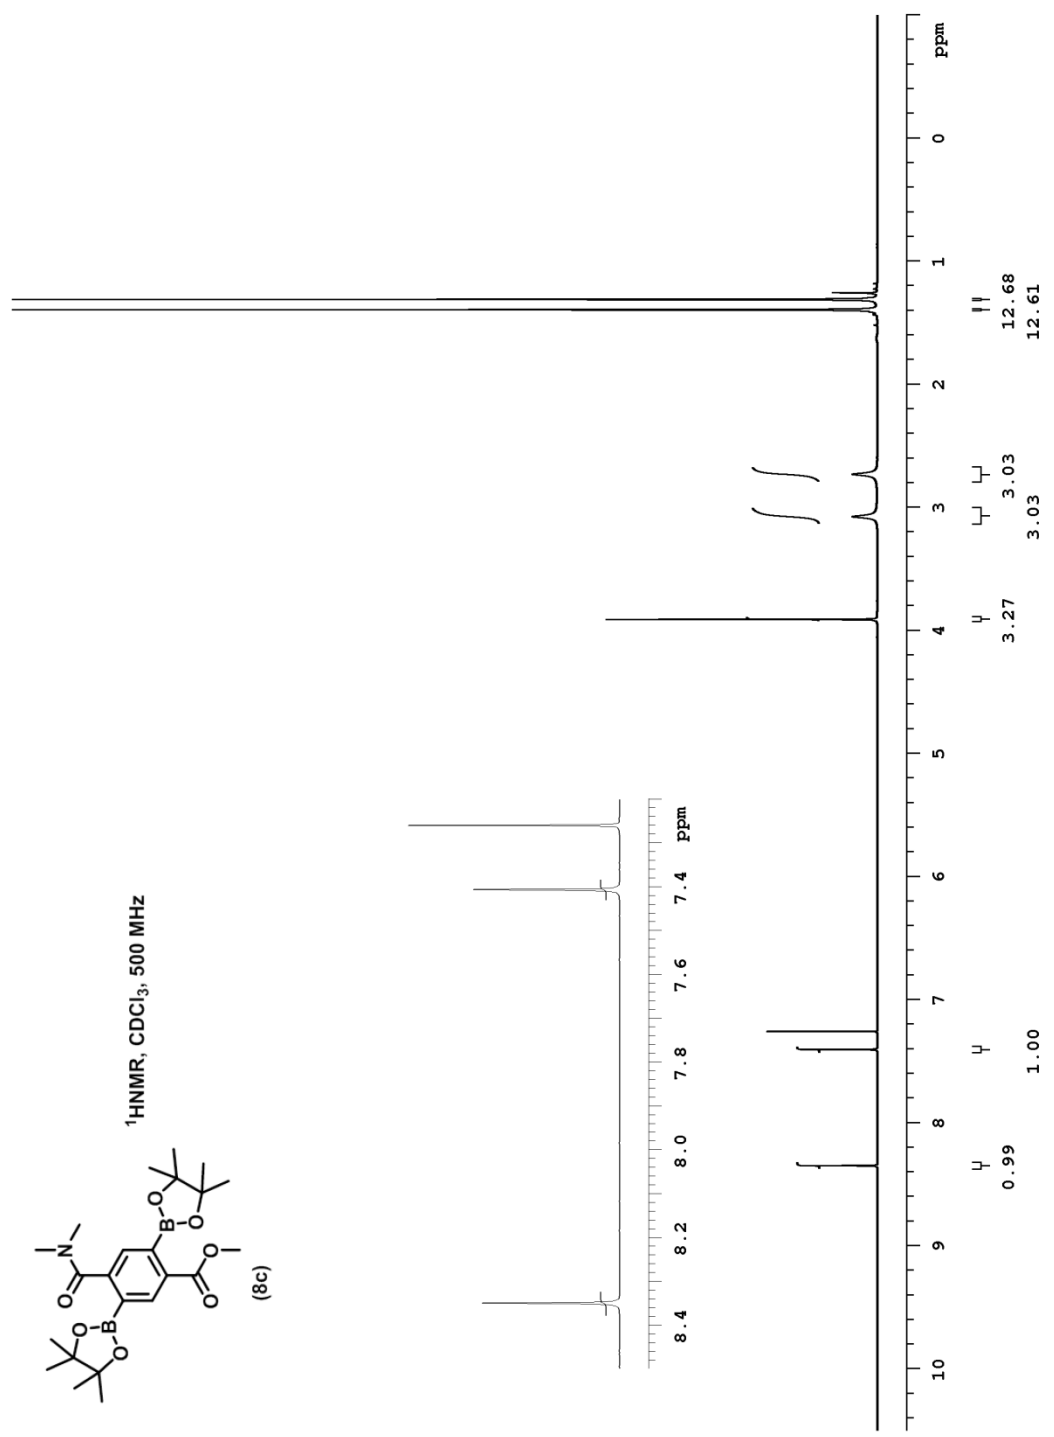



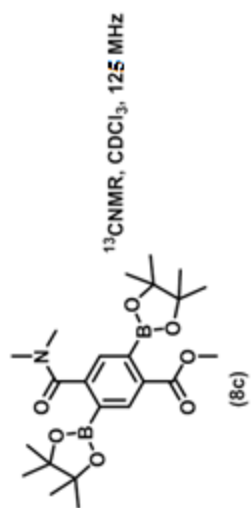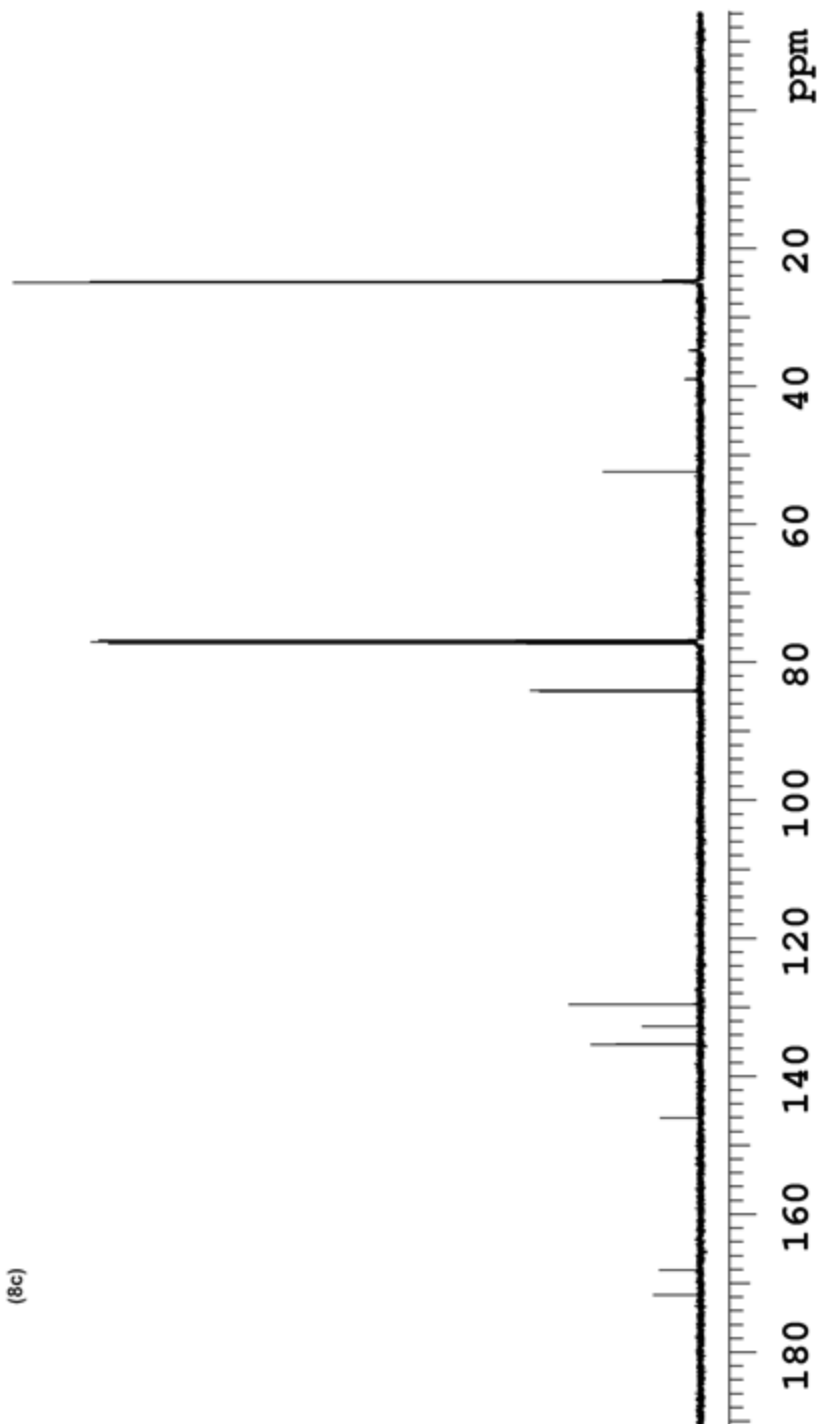

(8d), <sup>1</sup>H NMR, CDCl<sub>3</sub>, 500 MHz

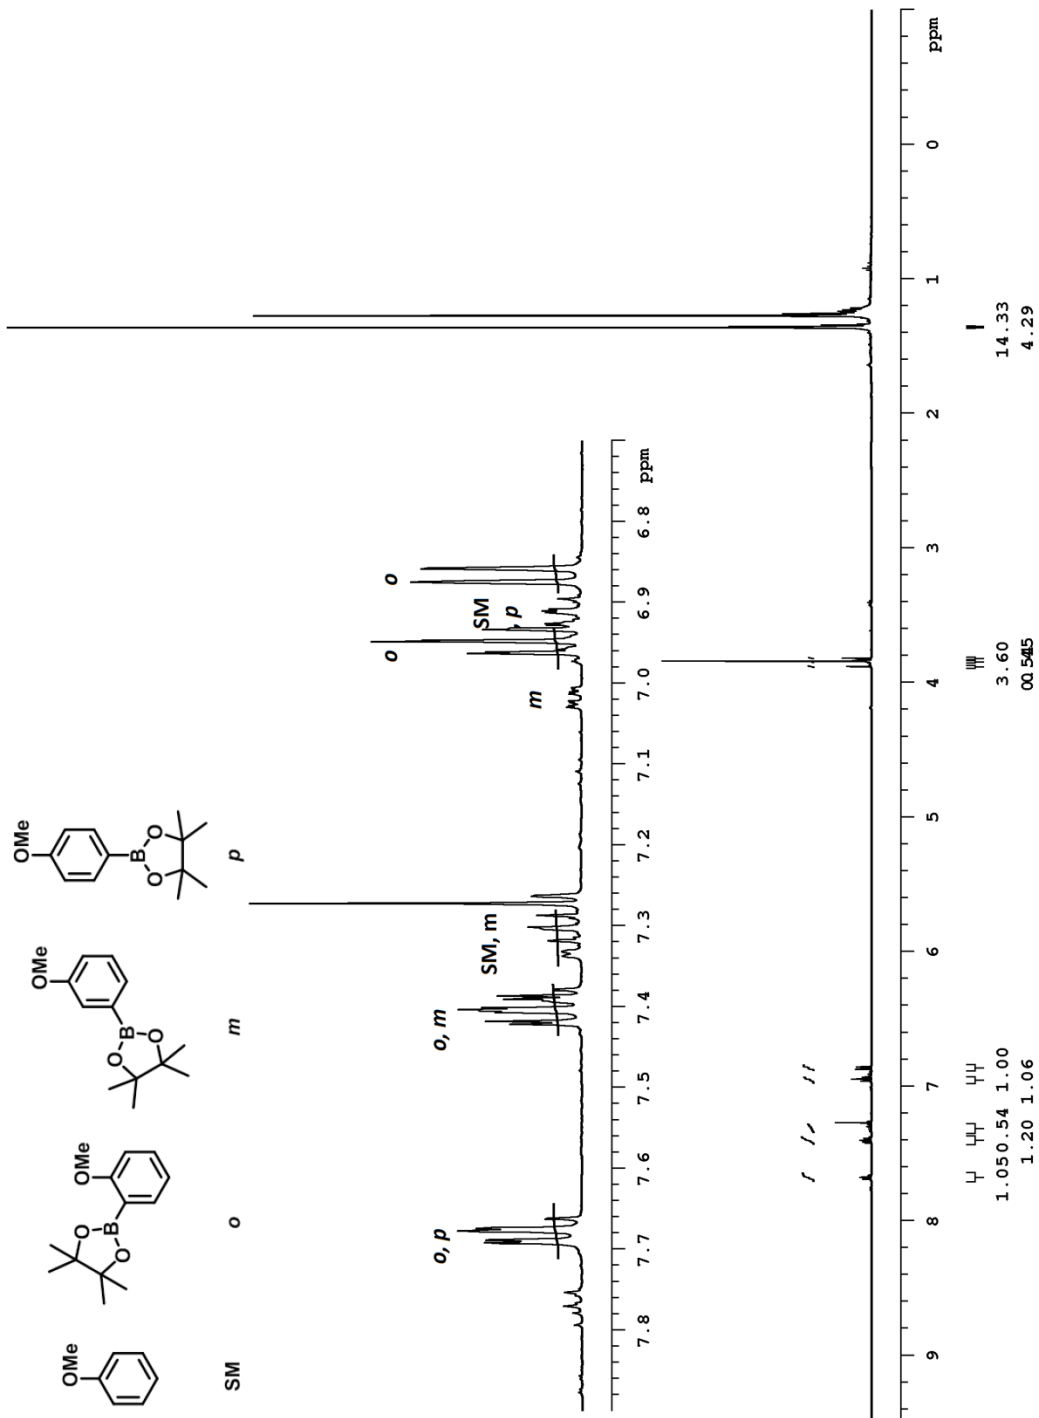

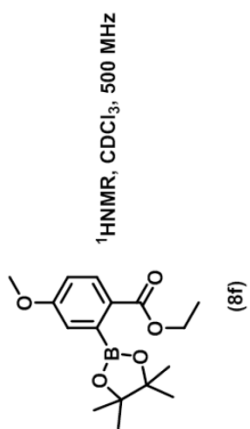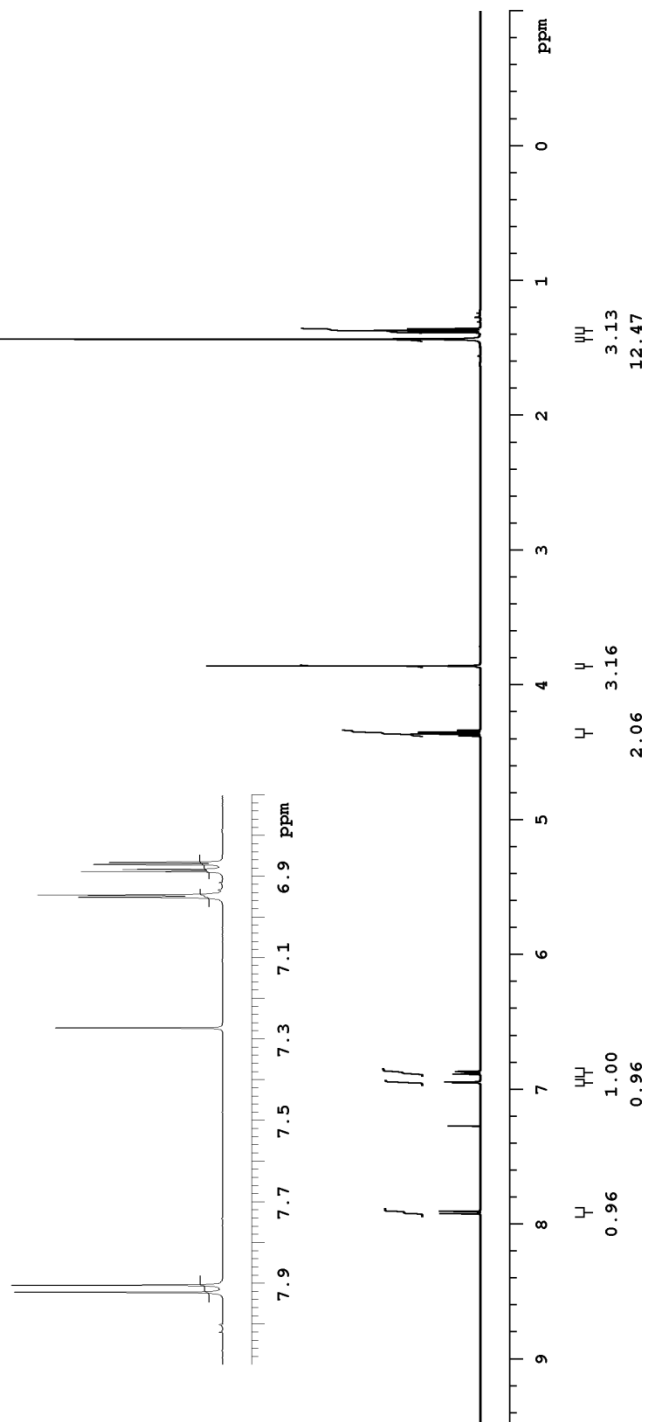

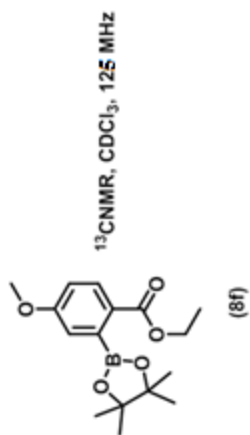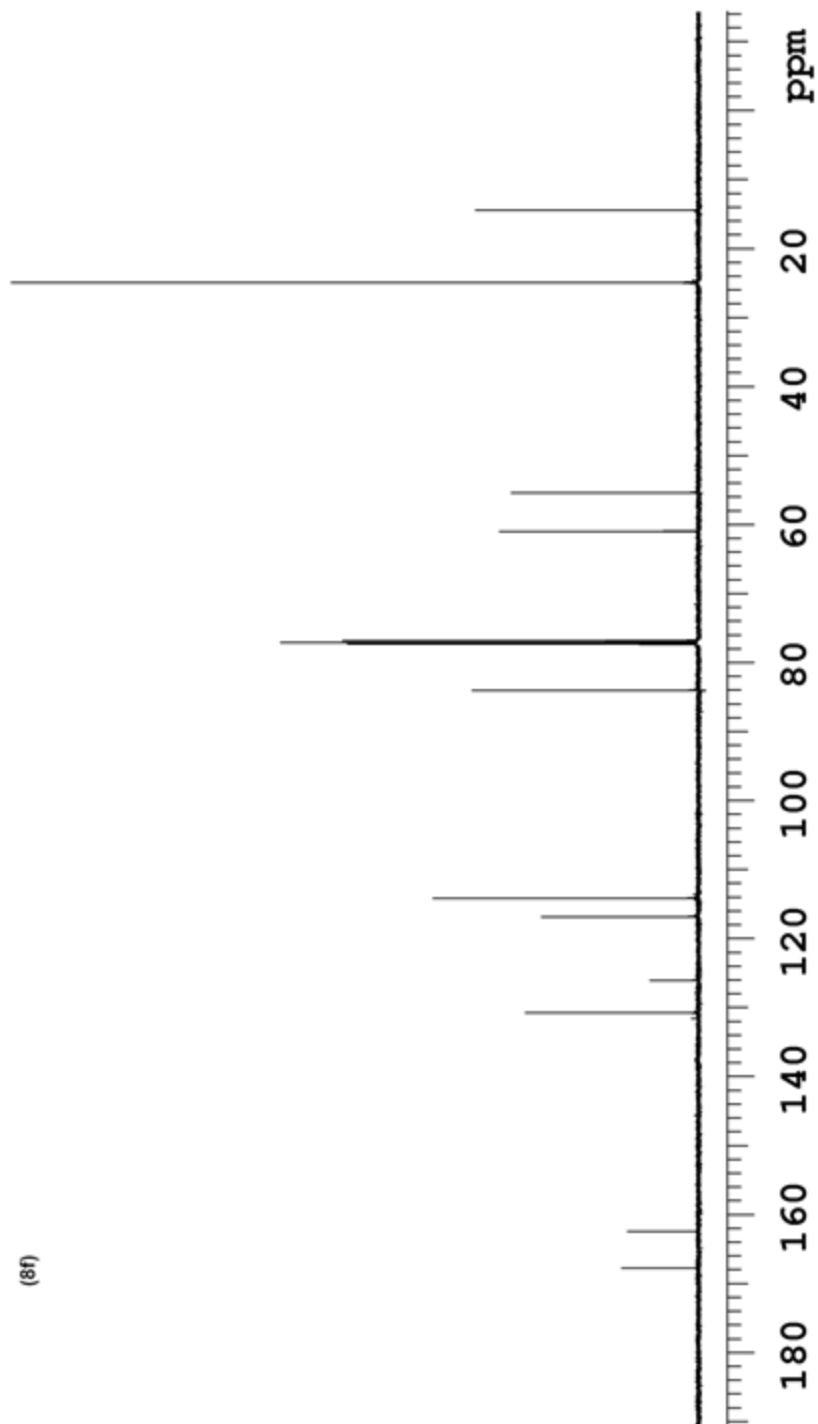

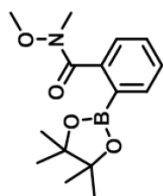

(8g)

<sup>1</sup>HNMR, CDCl<sub>3</sub>, 500 MHz

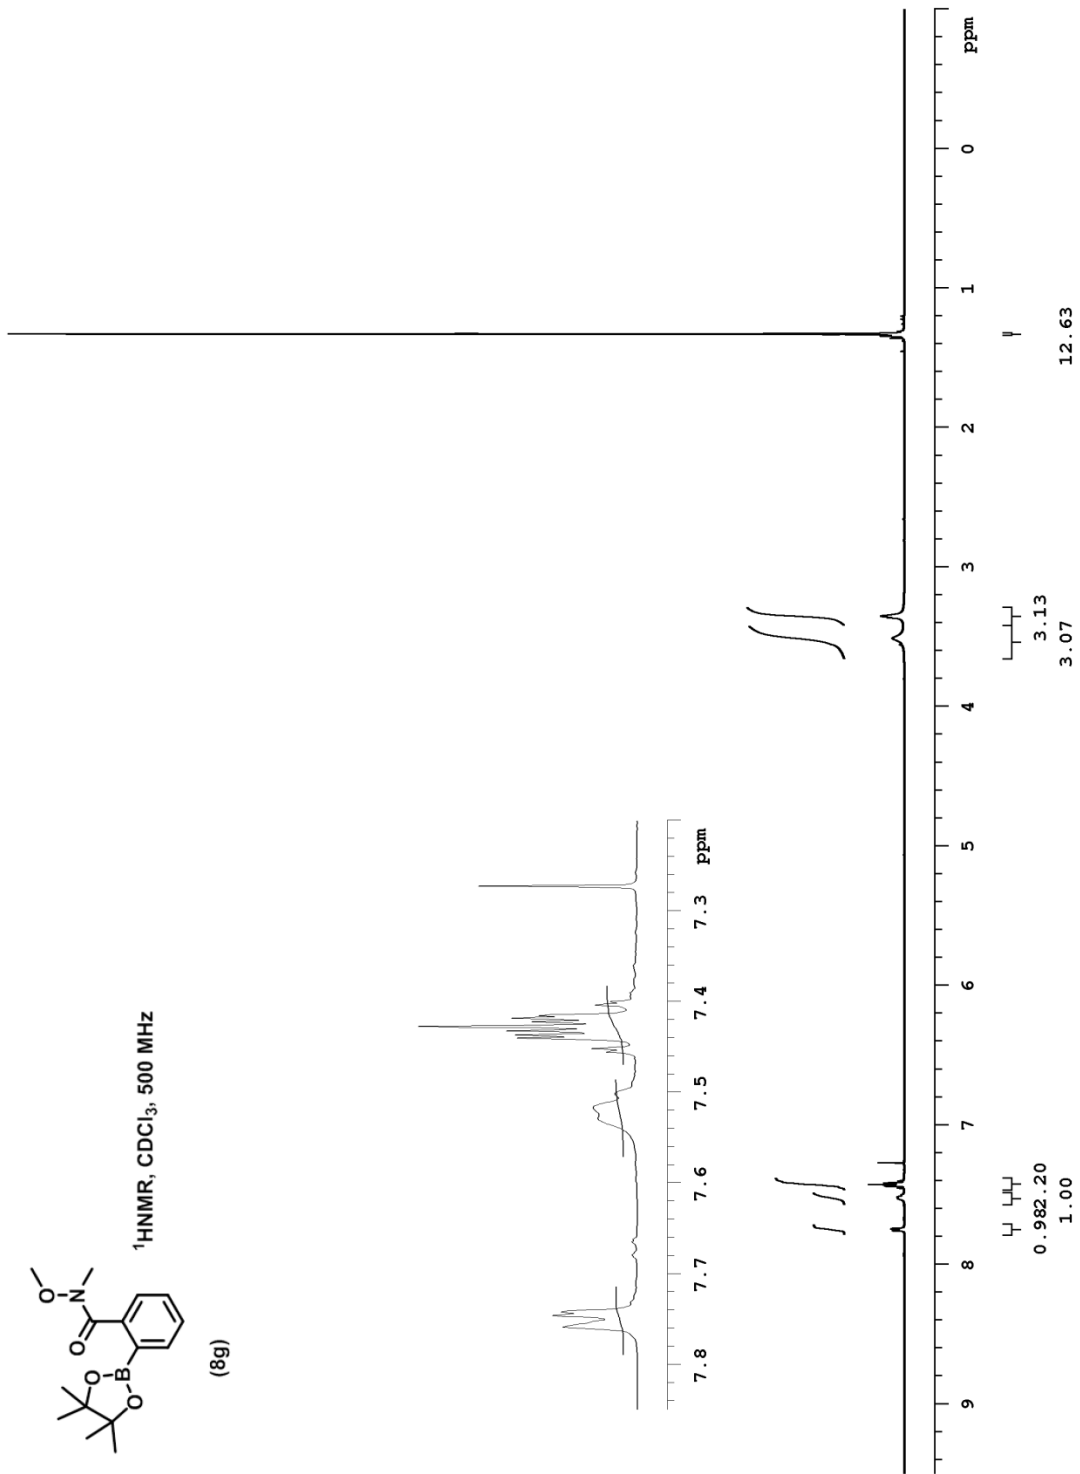

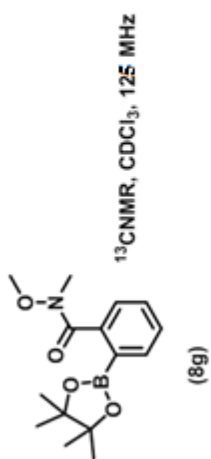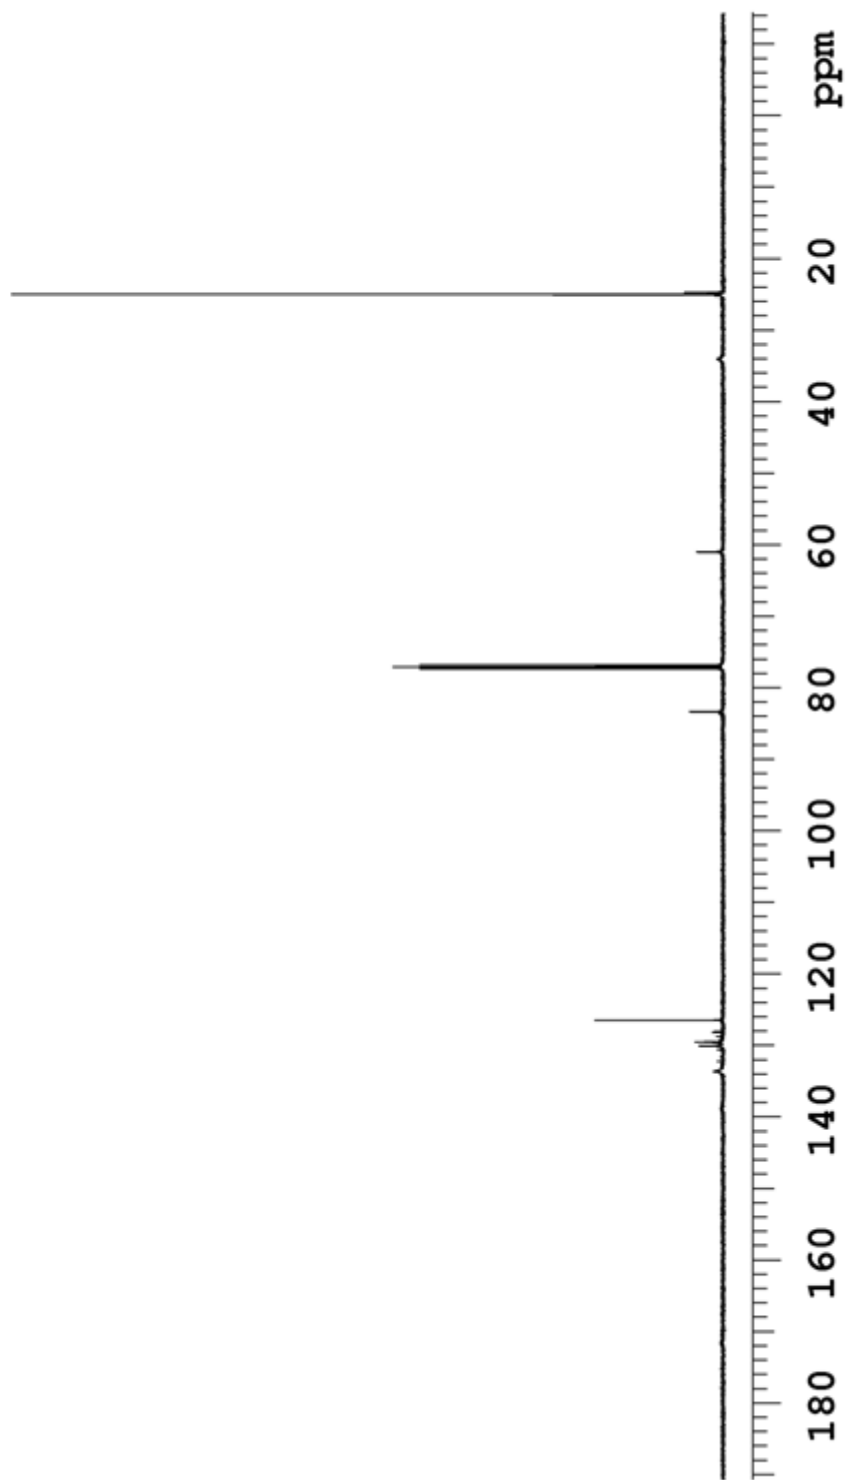

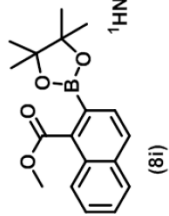

<sup>1</sup>H NMR, C<sub>6</sub>D<sub>6</sub>, 500 MHz

(8i)

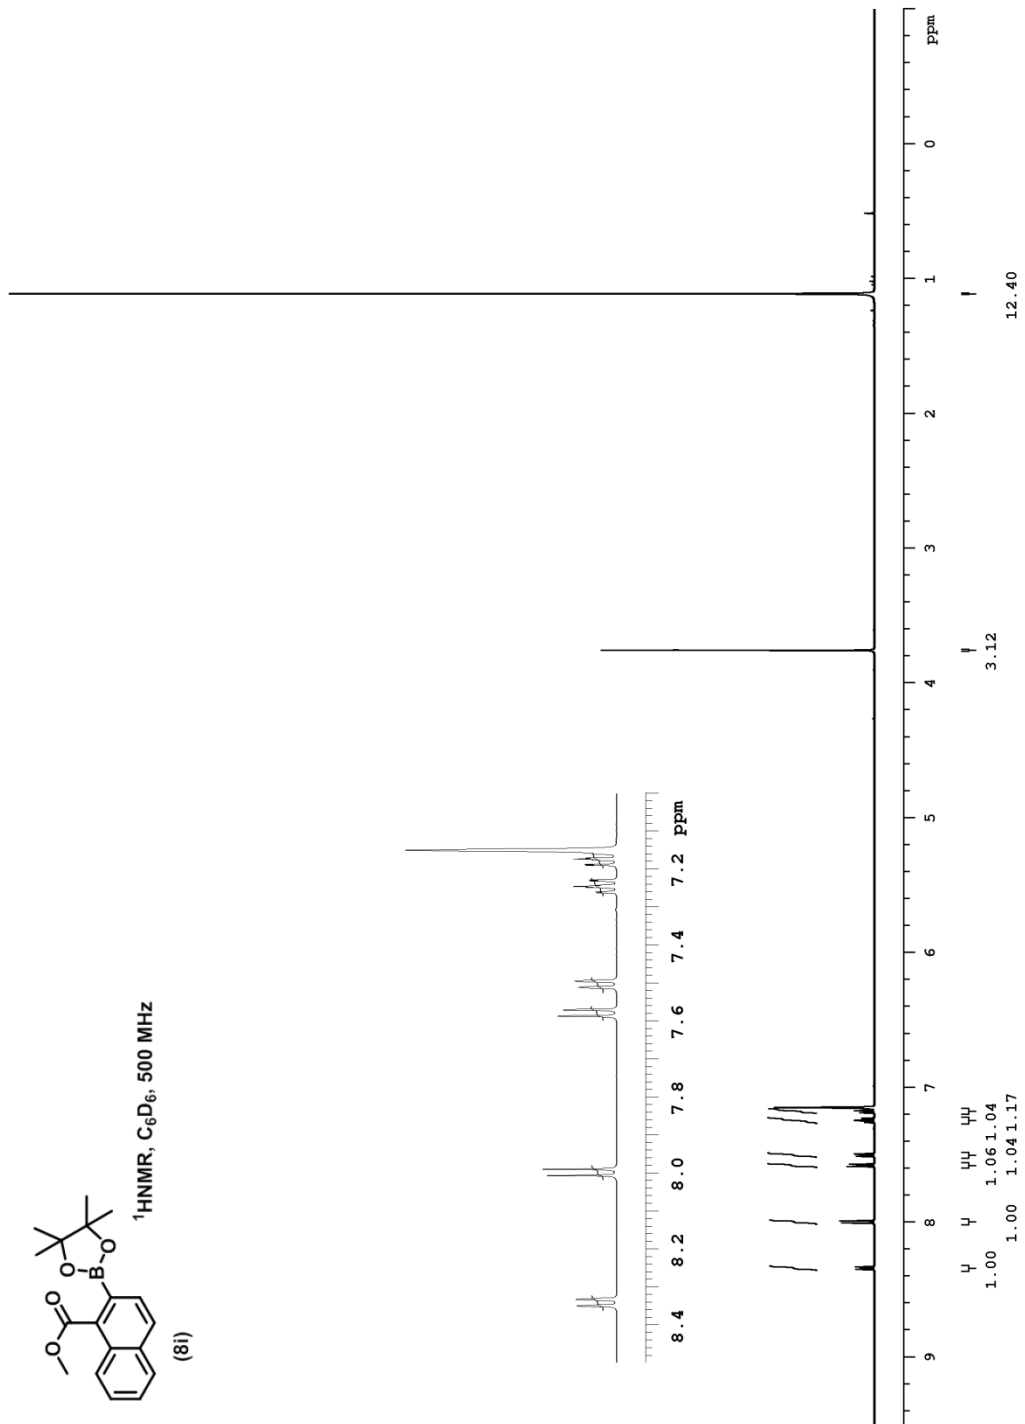

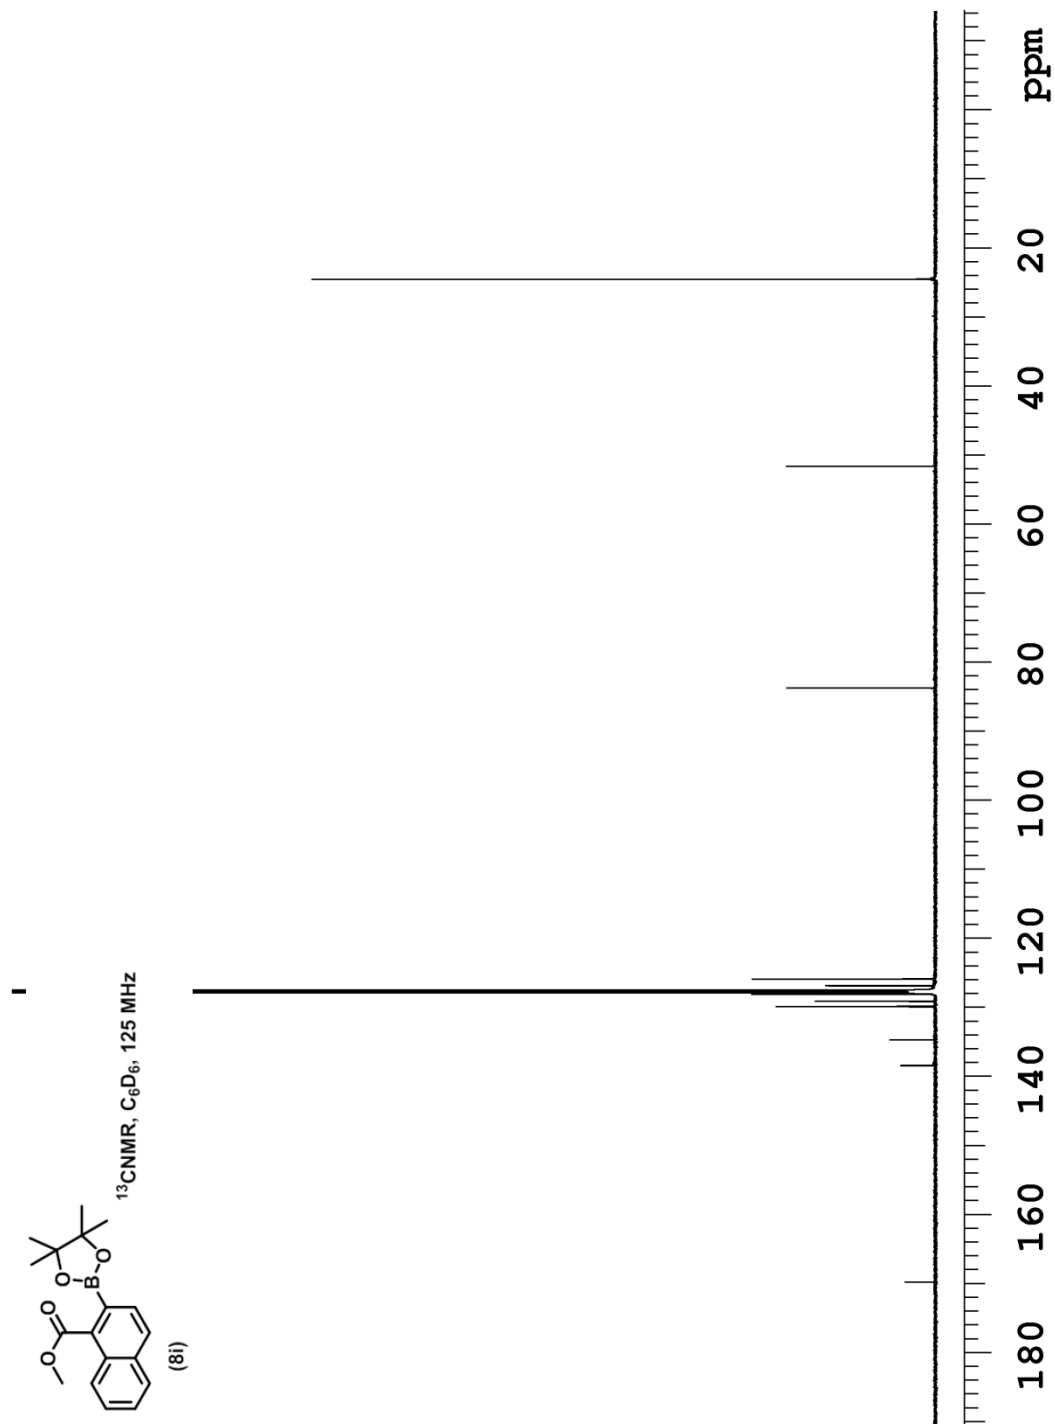



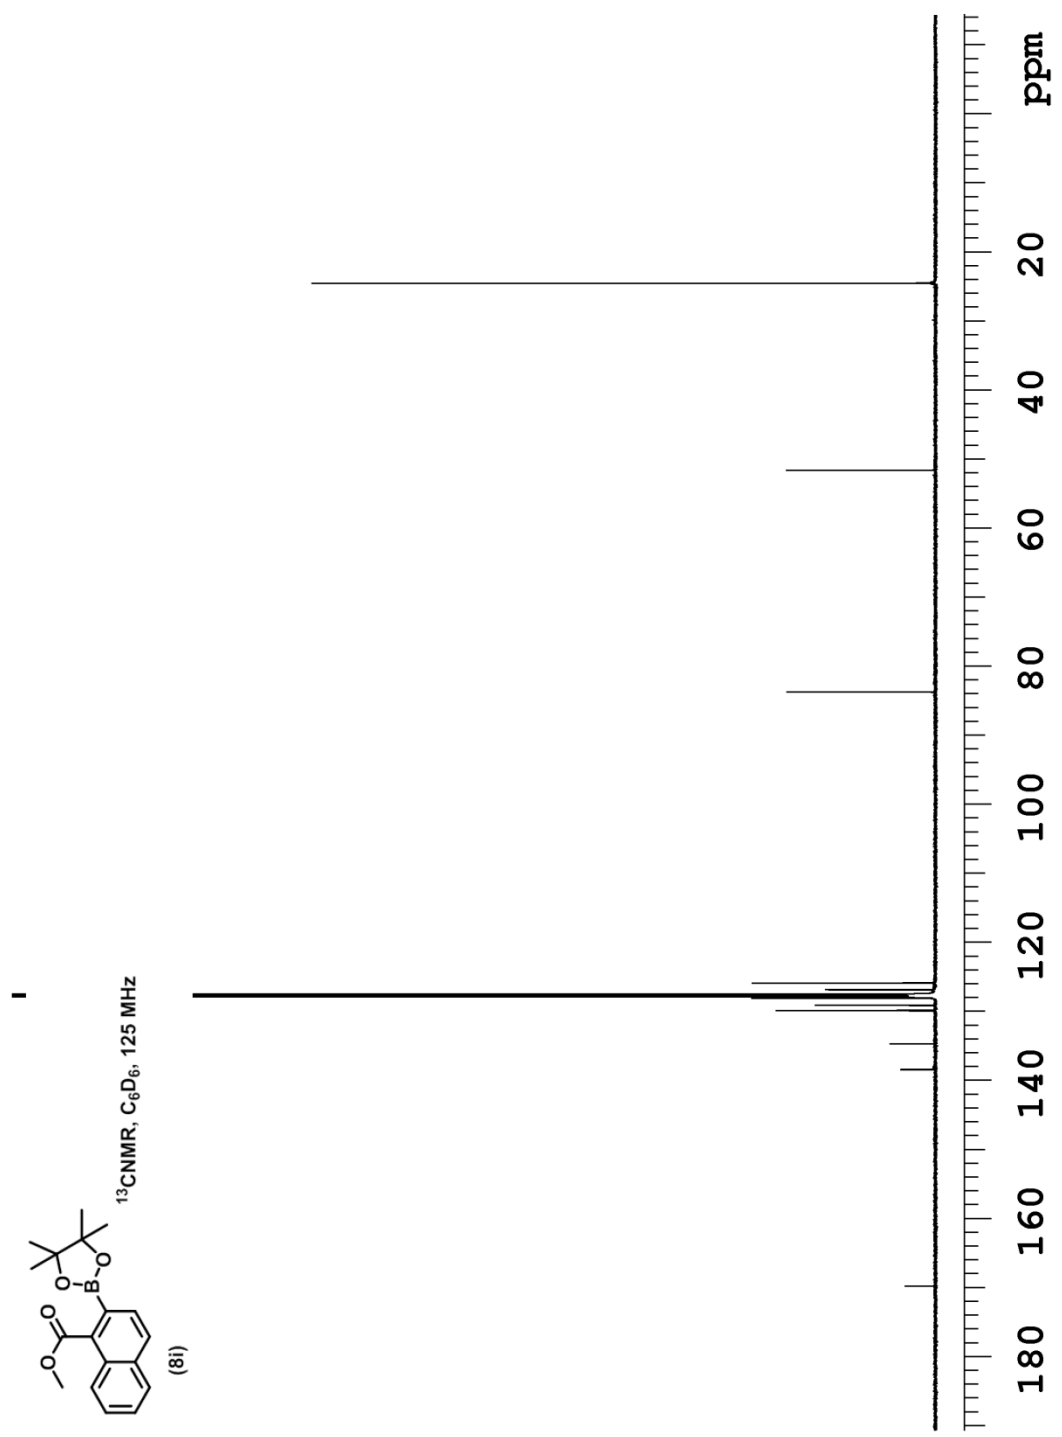

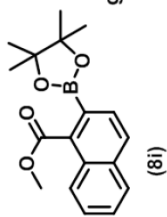

gCOSY, C<sub>6</sub>D<sub>6</sub>, 500 MHz

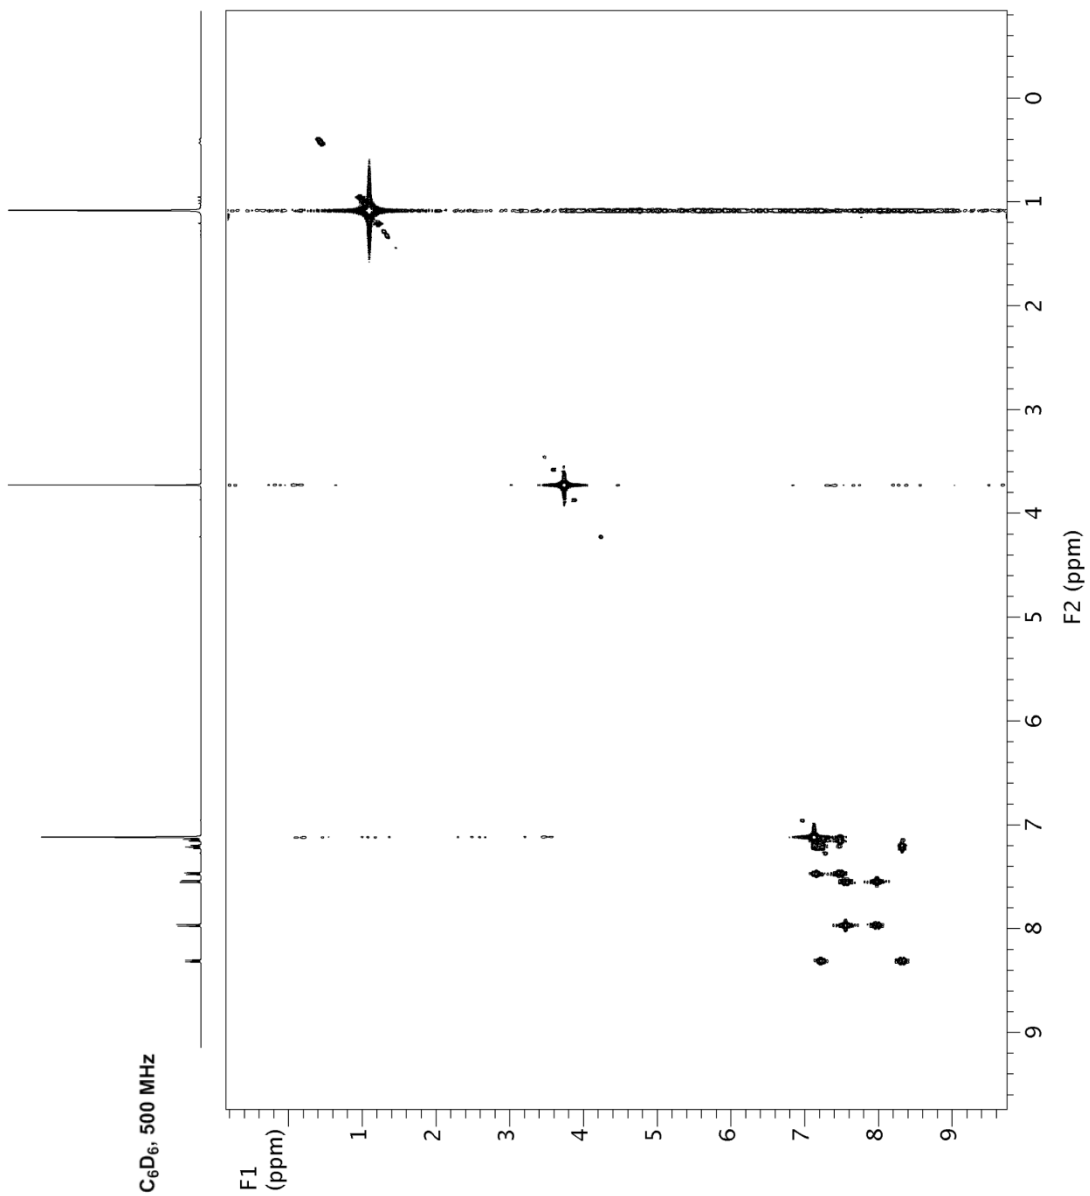

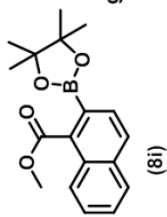

gCOSY, C<sub>6</sub>D<sub>6</sub>, 500 MHz

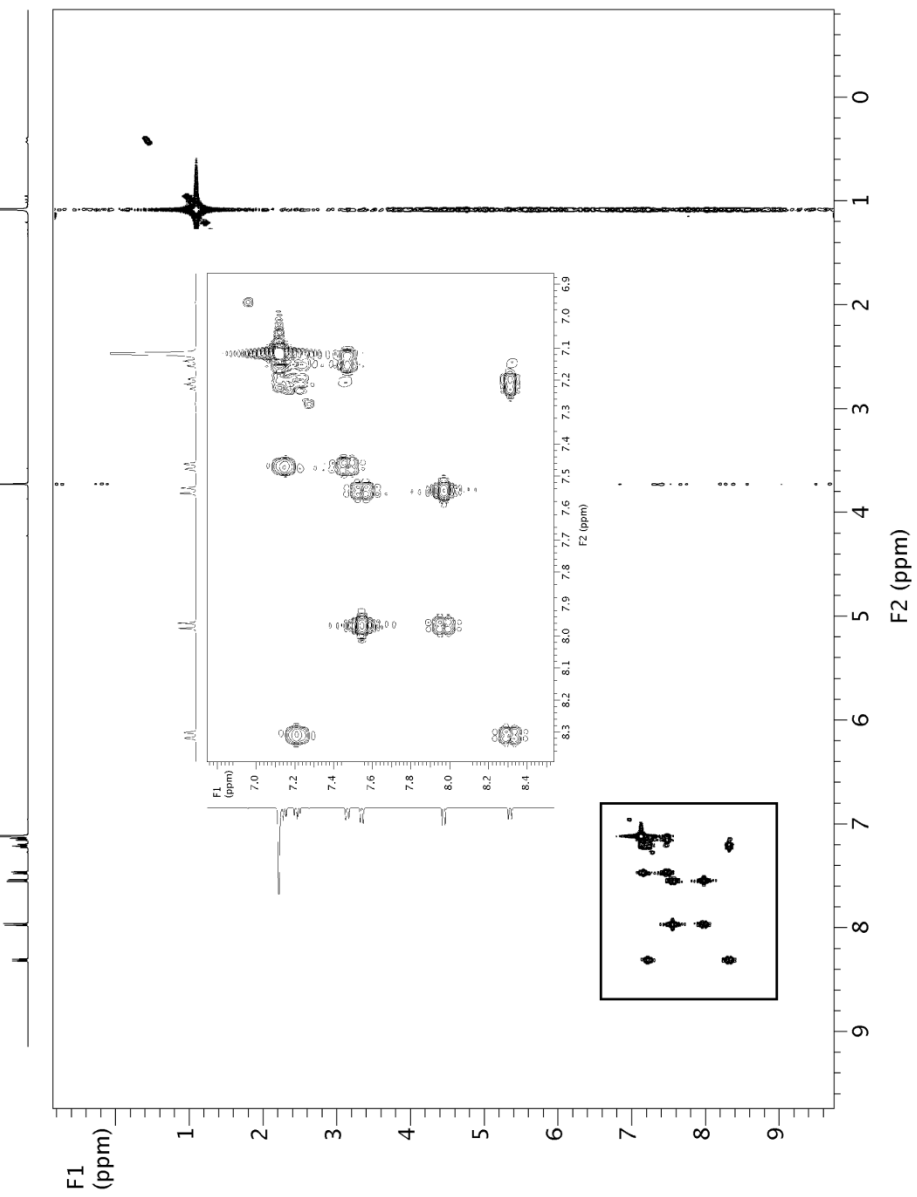

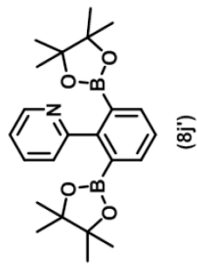

<sup>1</sup>HNMR, CDCl<sub>3</sub>, 500 MHz

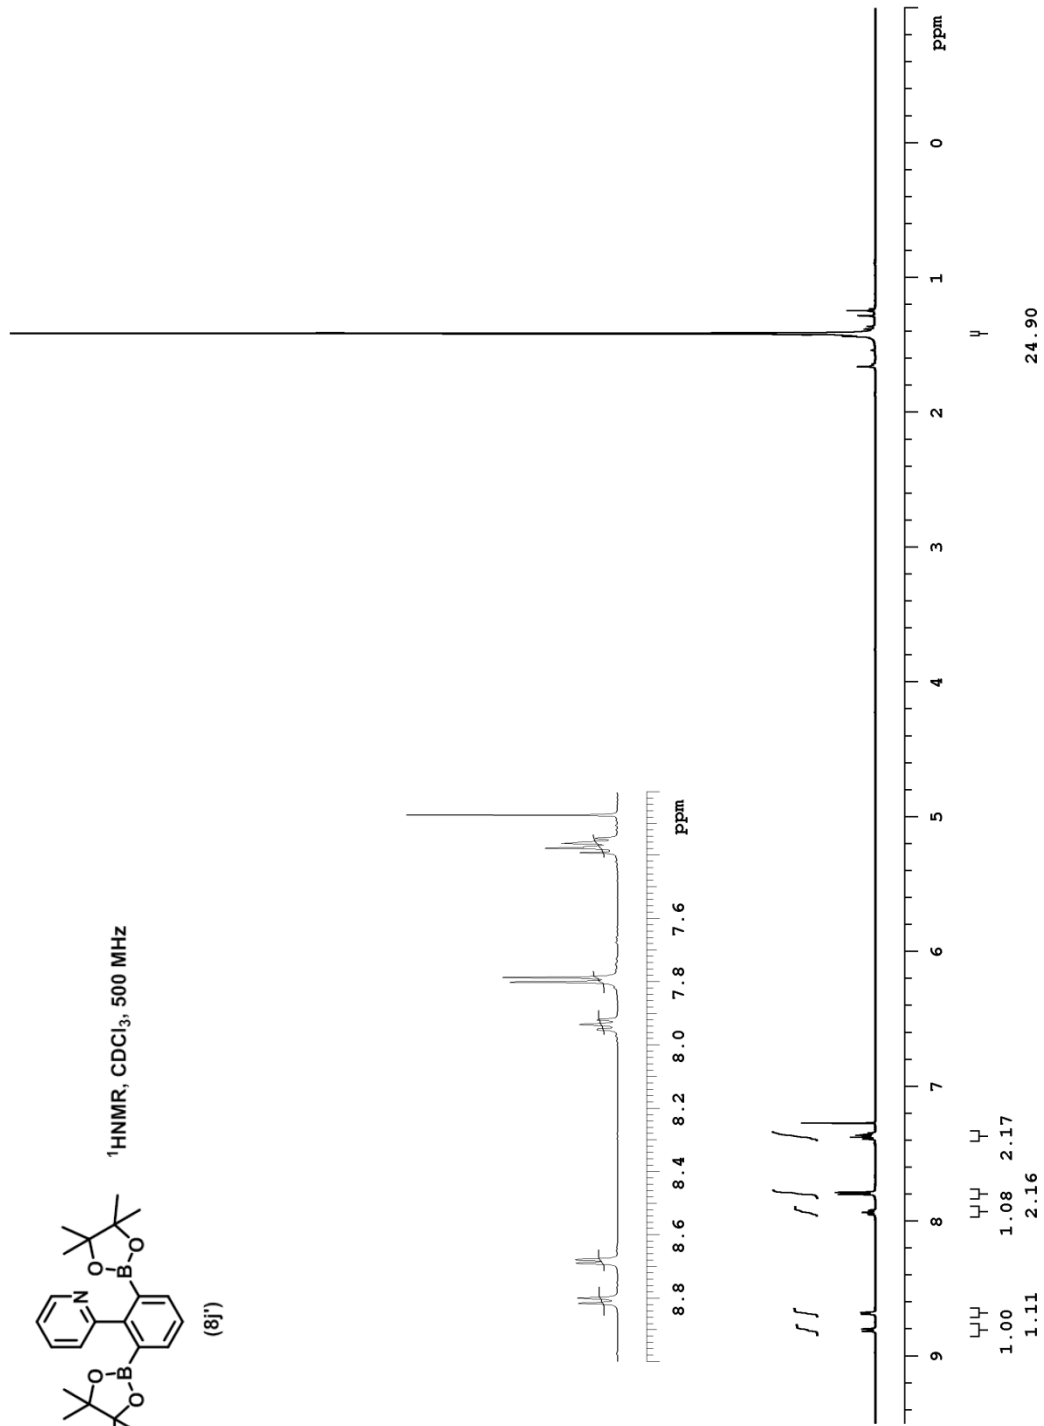

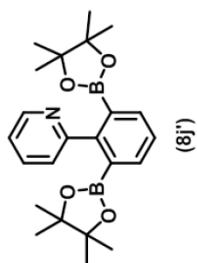

<sup>13</sup>CNMR, CDCl<sub>3</sub>, 125 MHz

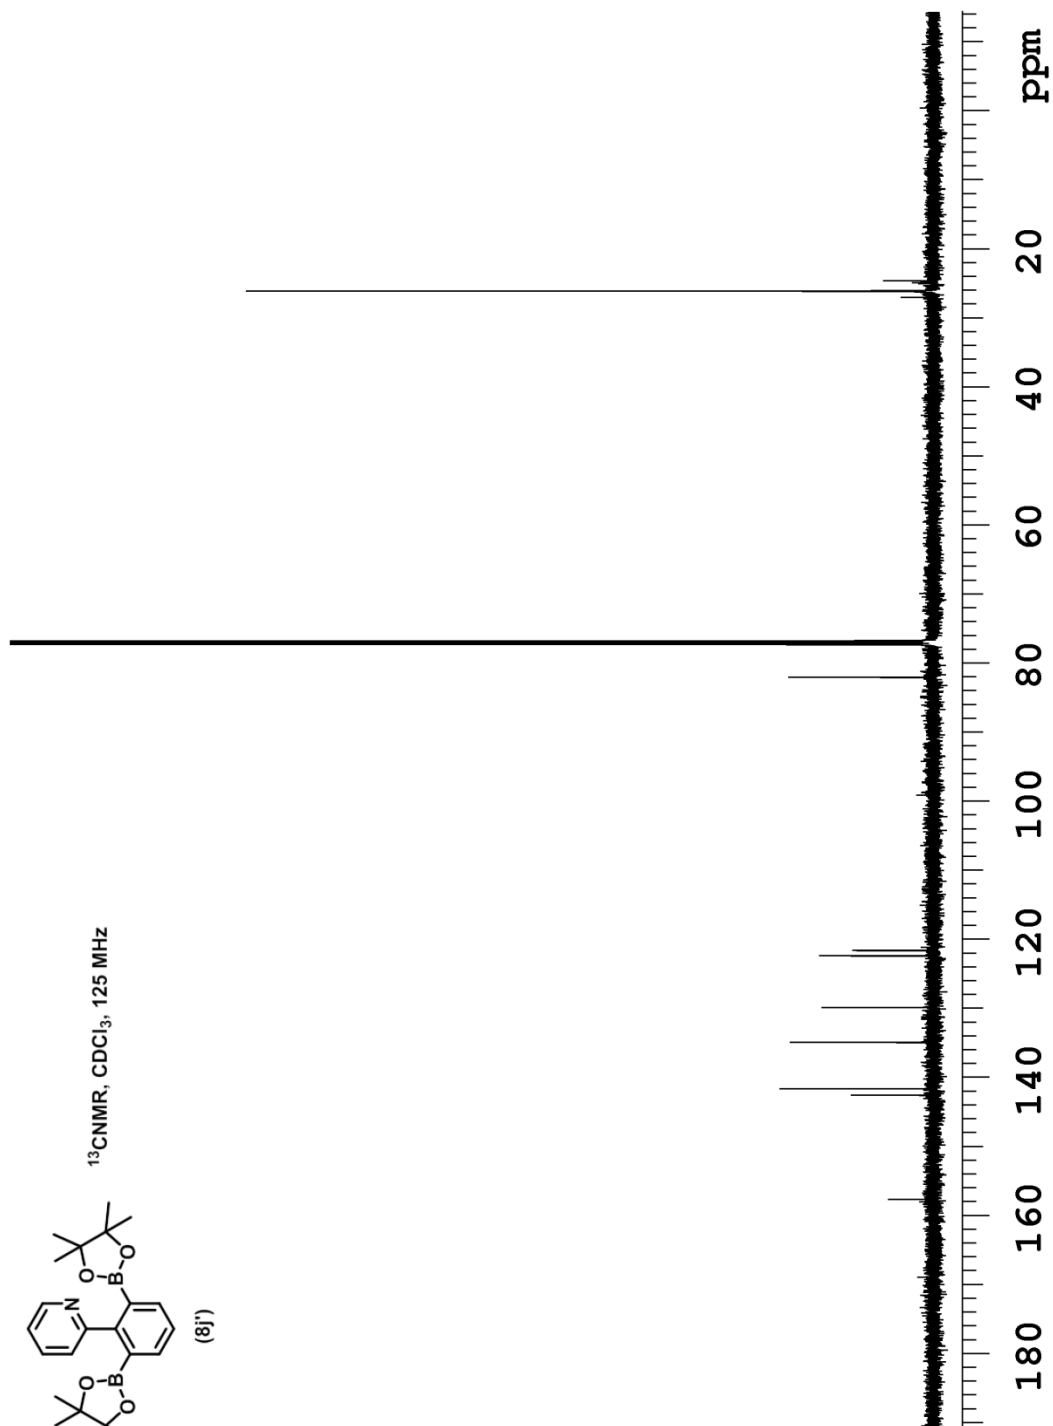

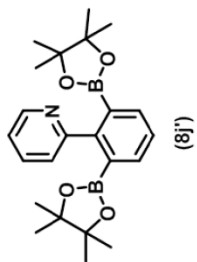

gCOSY, CDCl<sub>3</sub>, 500 MHz

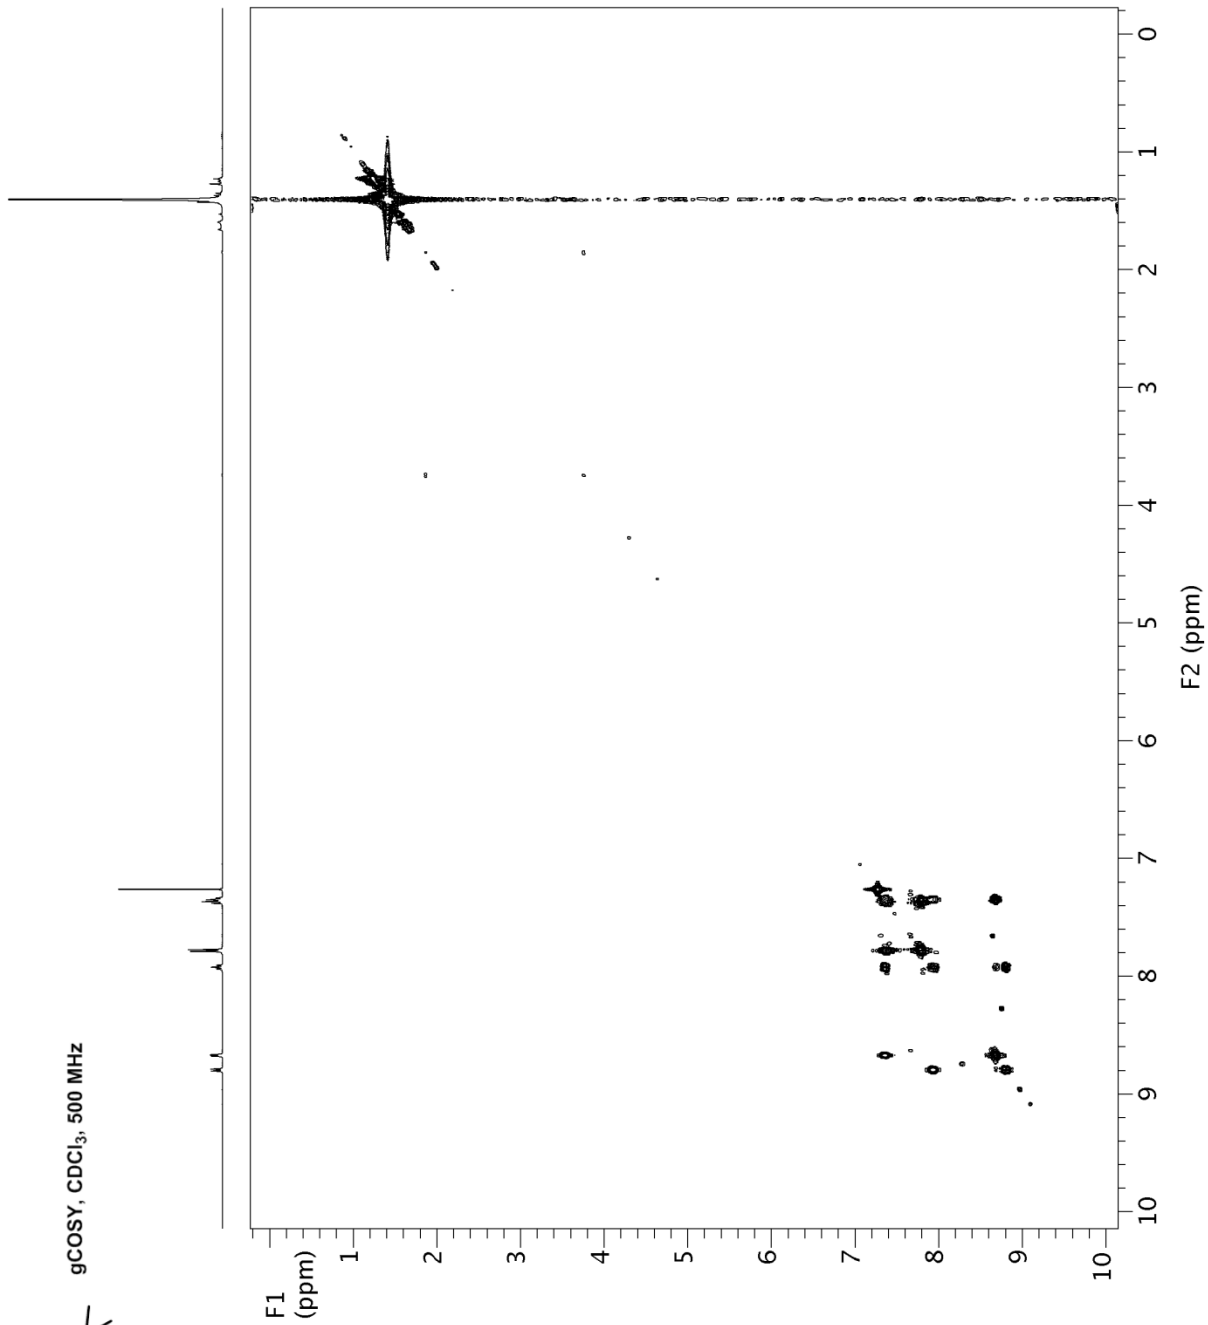

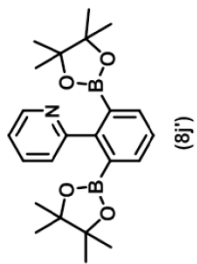

gCOSY, CDCl<sub>3</sub>, 500 MHz

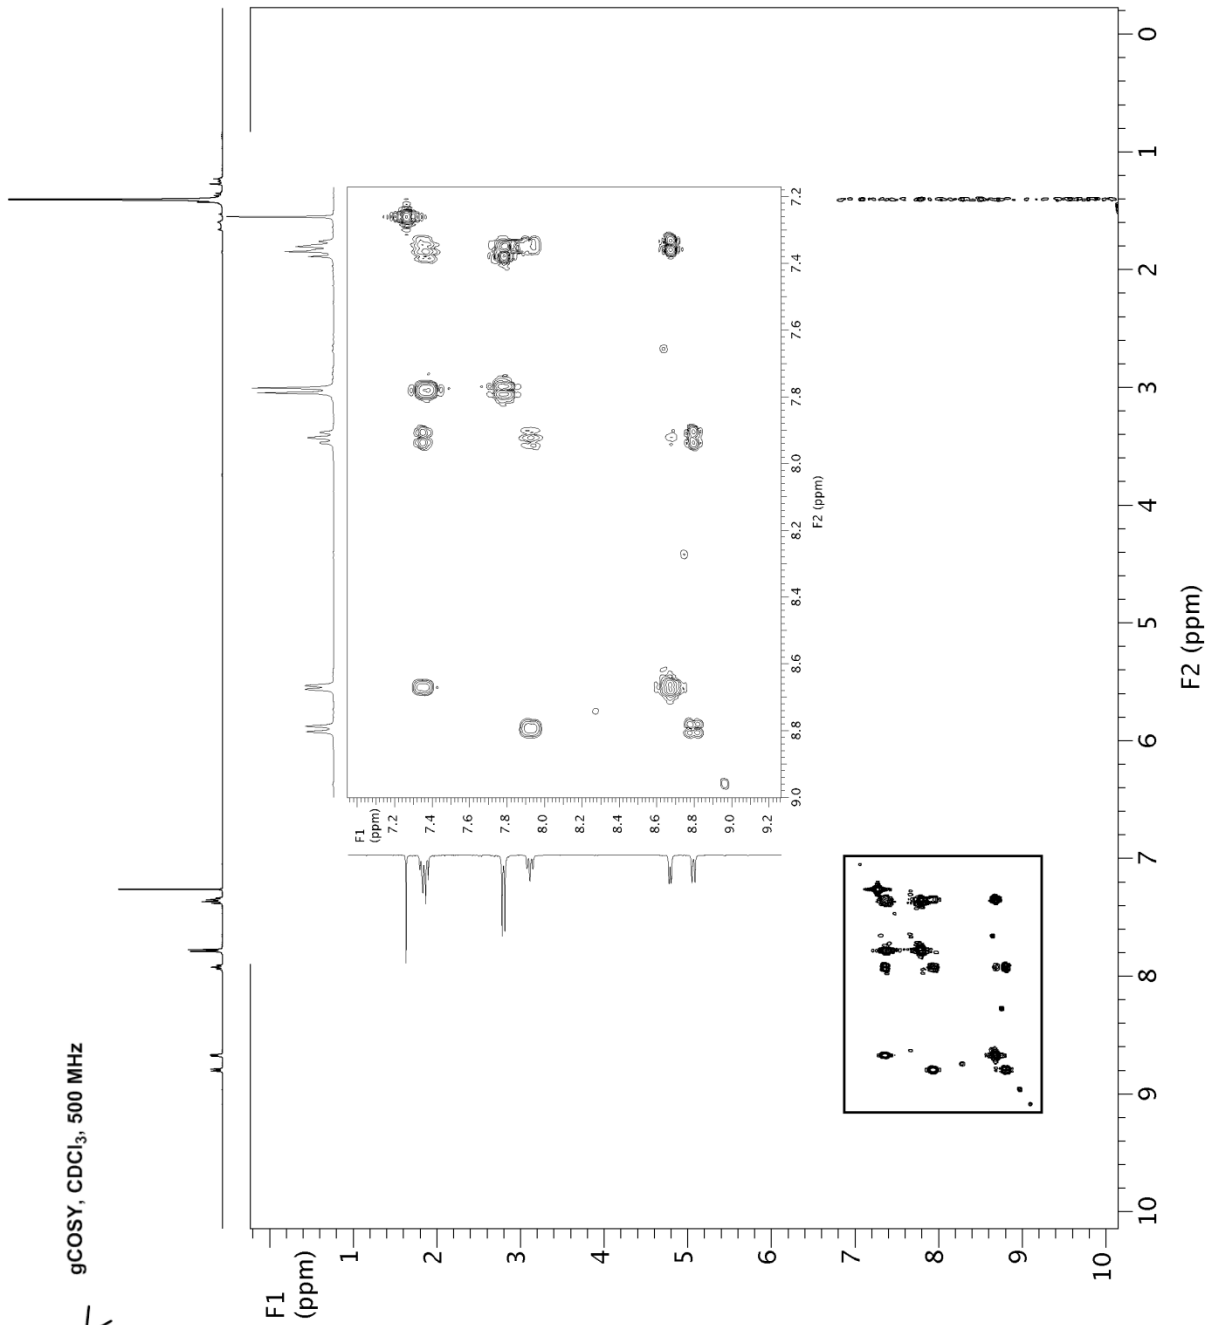

IrCODSiPBz (9), <sup>1</sup>H NMR, d8-THF, 500 MHz

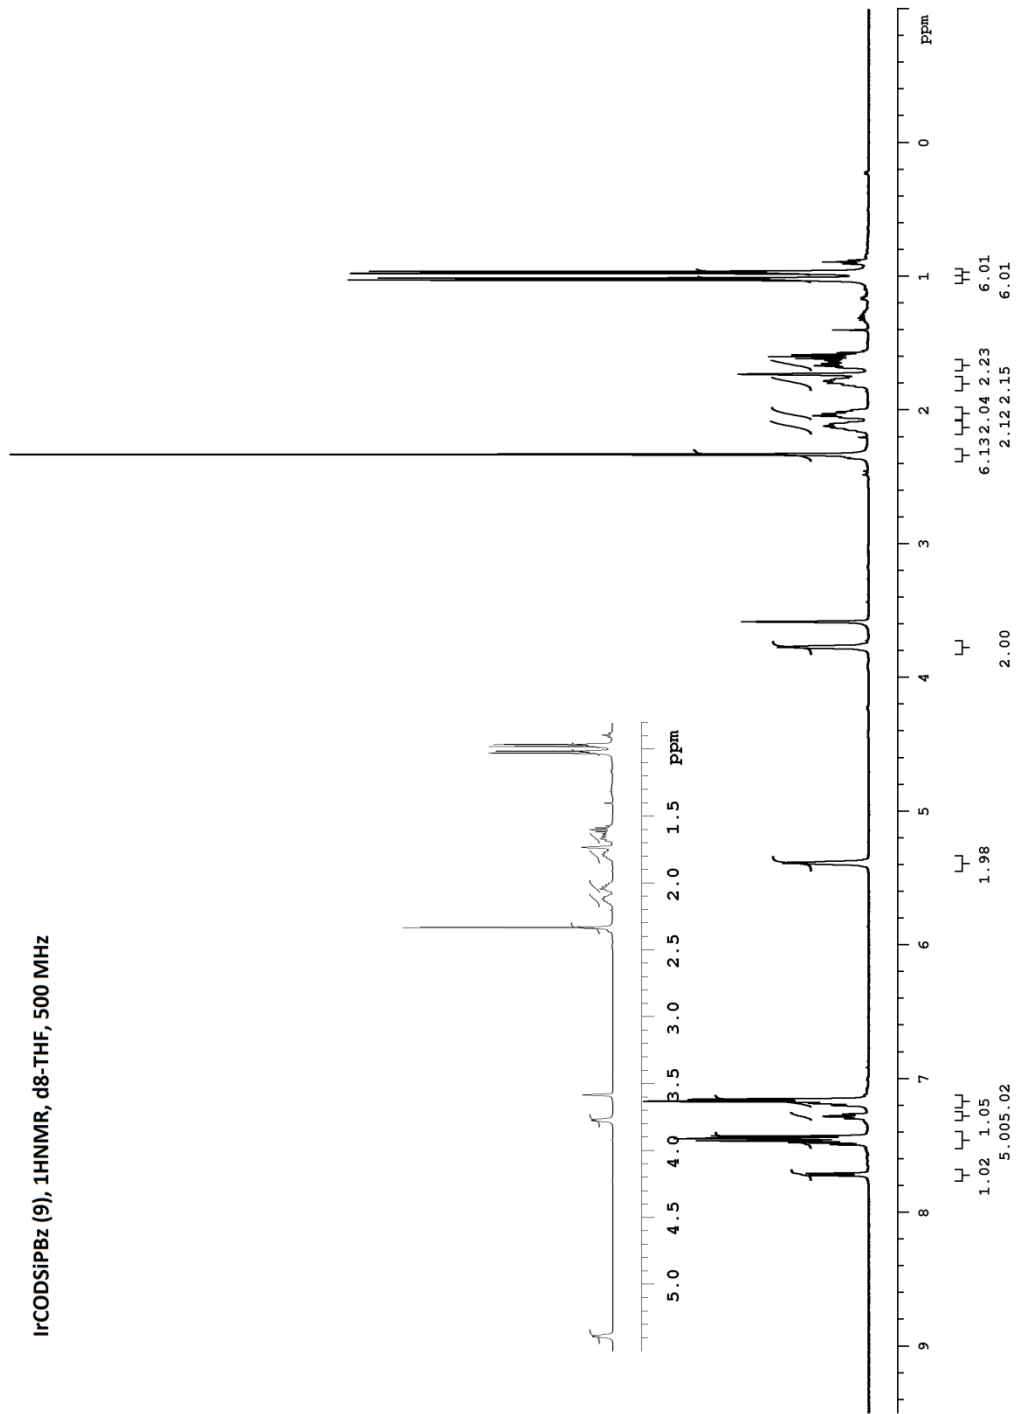



IrCODSiPBz (9), <sup>13</sup>CNMR, d8-THF, 125 MHz

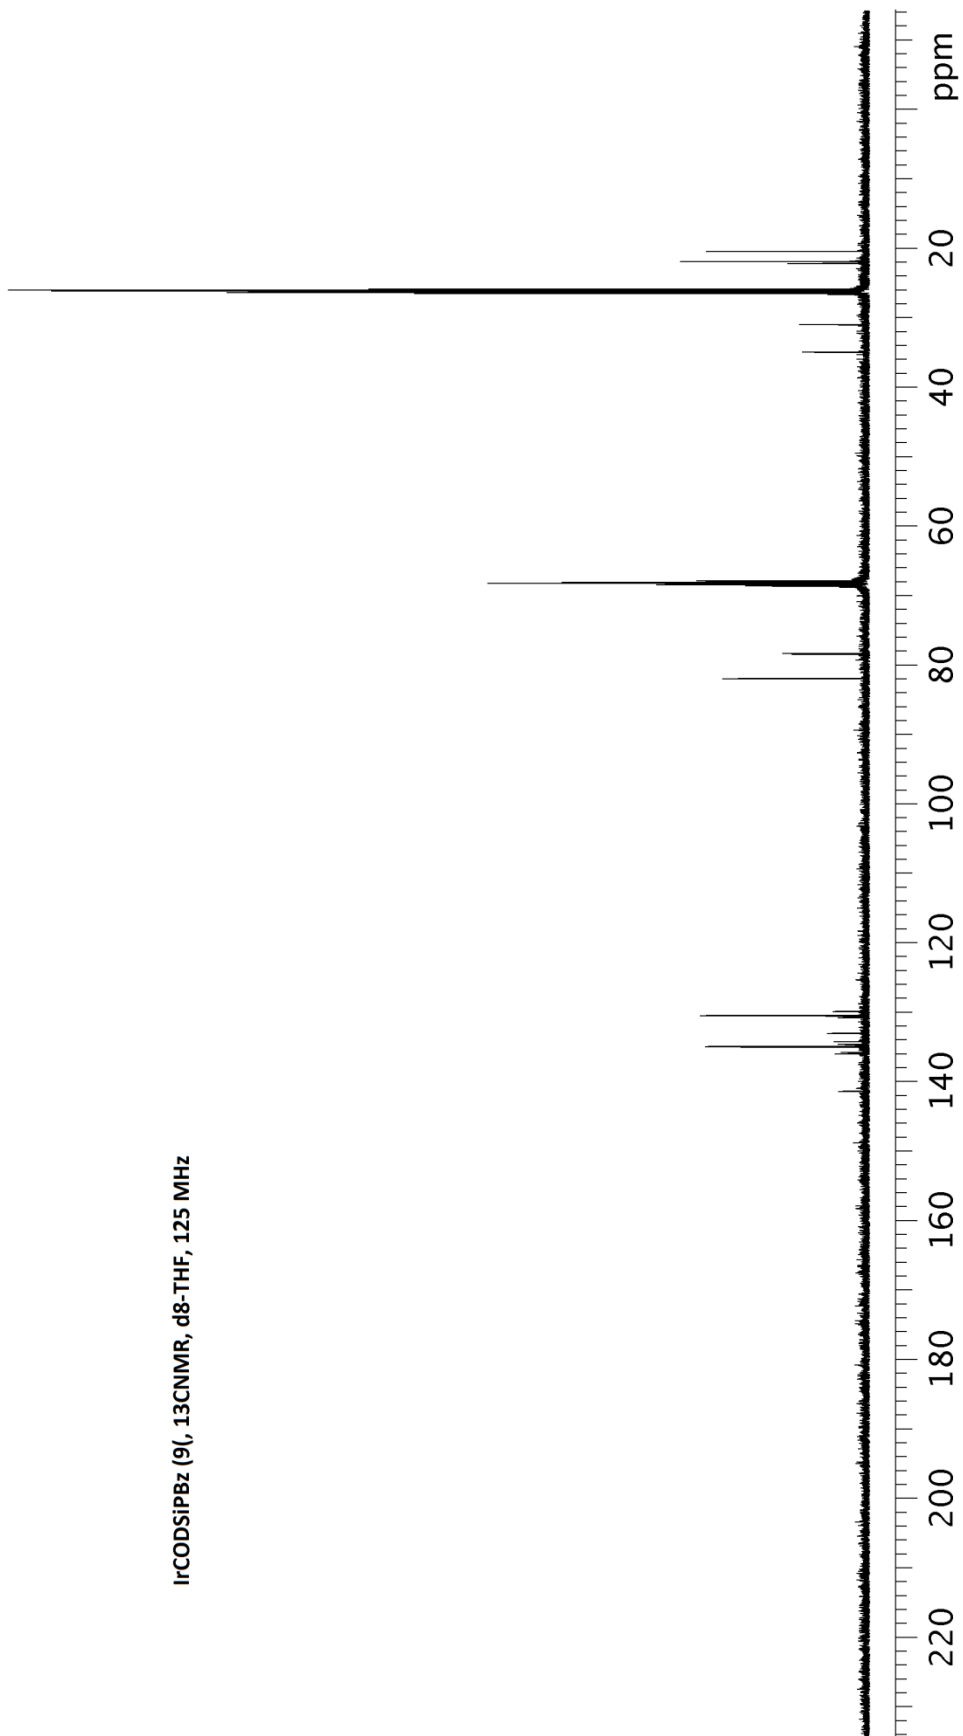

IrCODSIPbz (9), 31PNMIR, d8-THF, 202 MHz

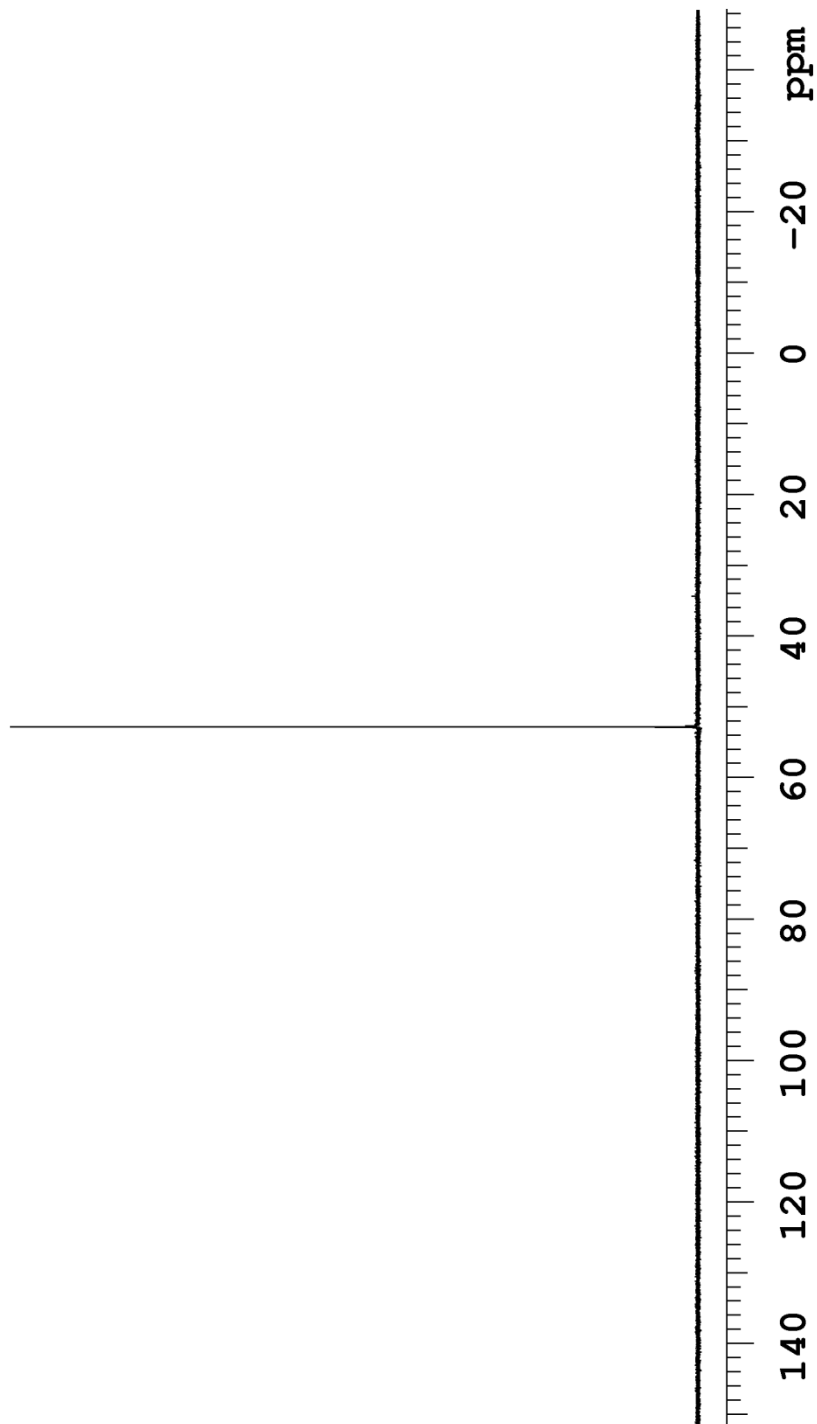

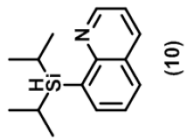

<sup>1</sup>HNMR, C<sub>6</sub>D<sub>6</sub>, 500 MHz

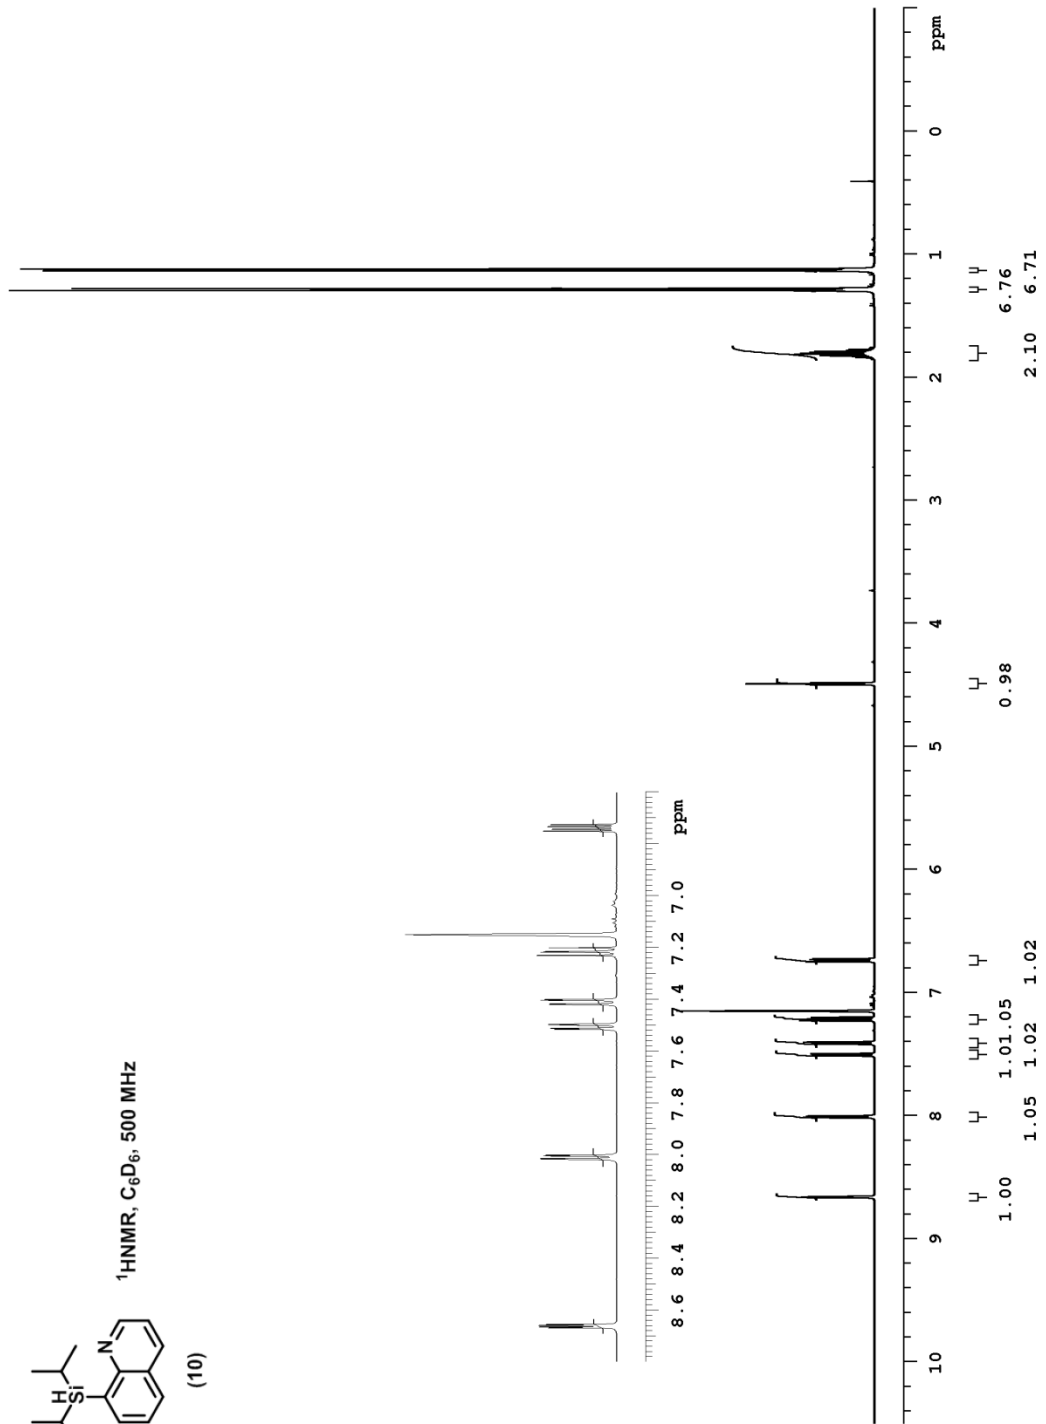

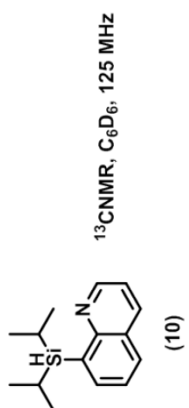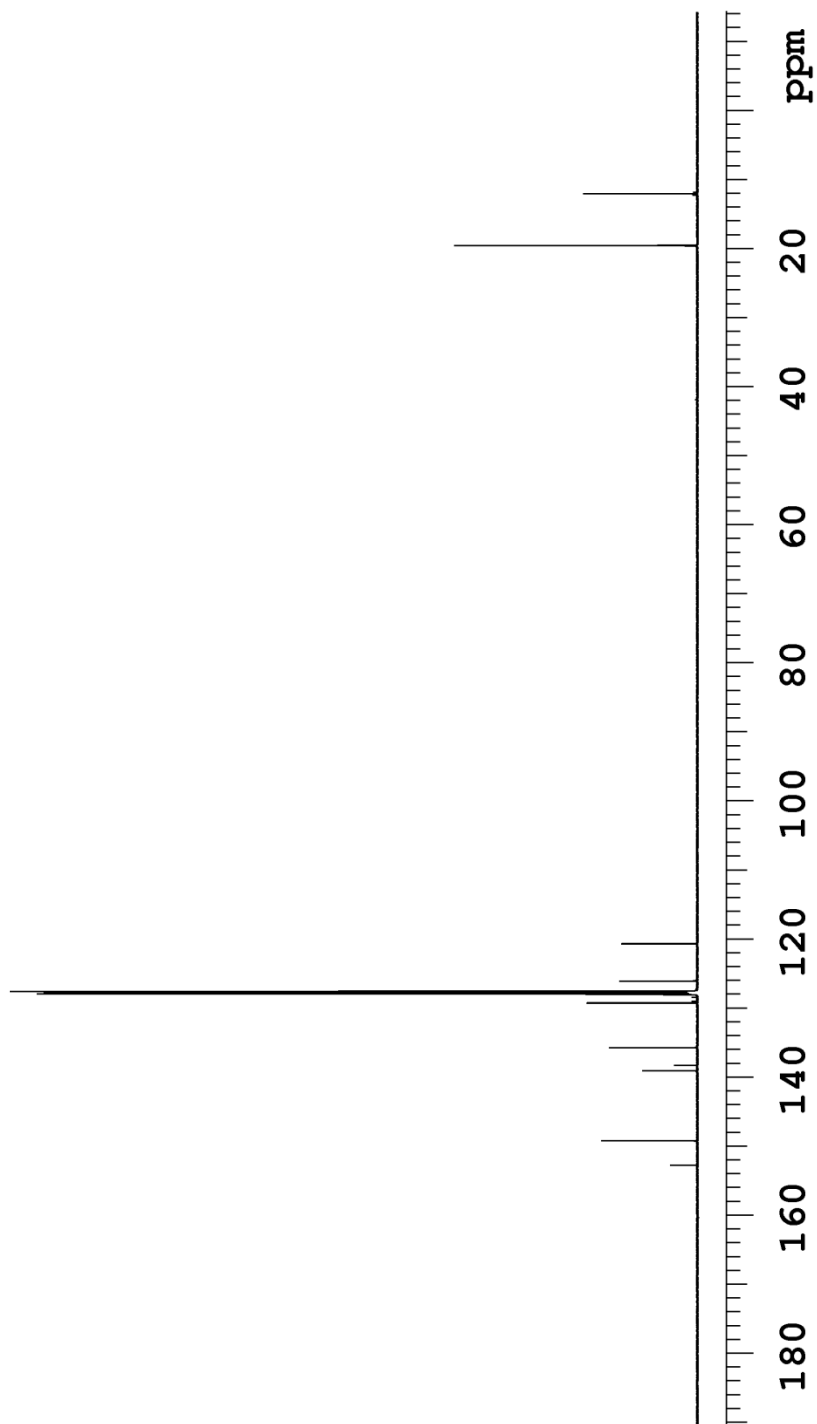

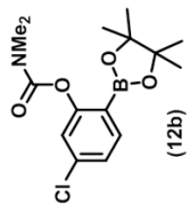

<sup>1</sup>HNMR, CDCl<sub>3</sub>, 500 MHz

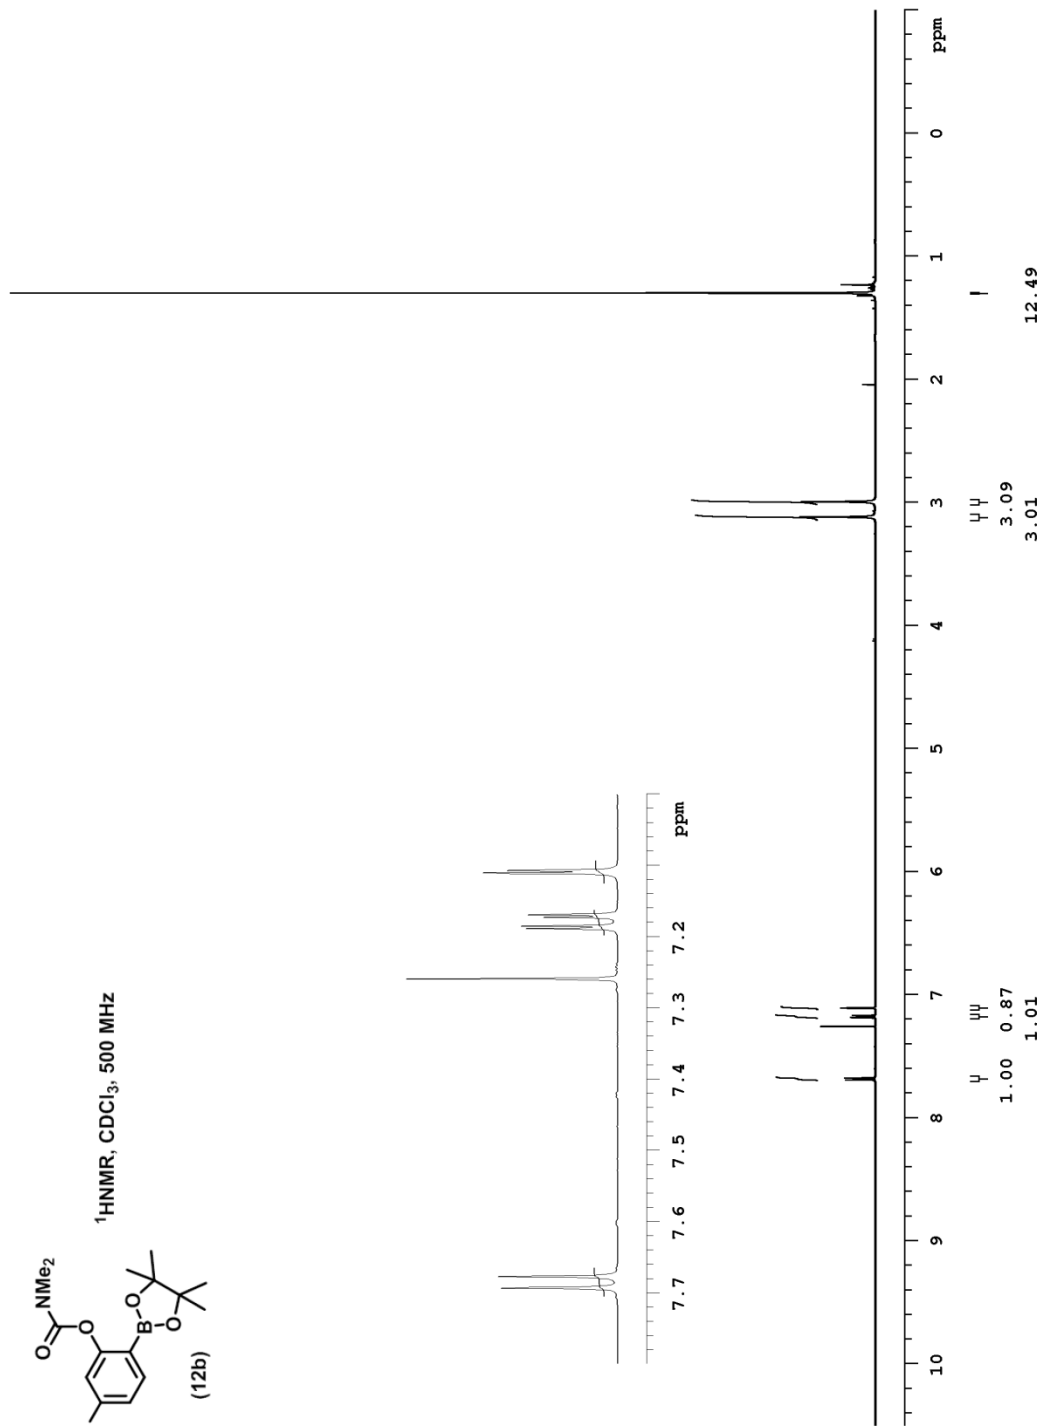

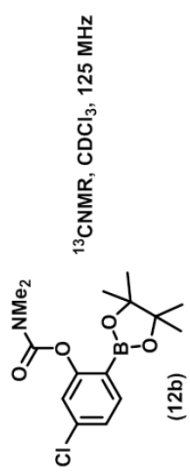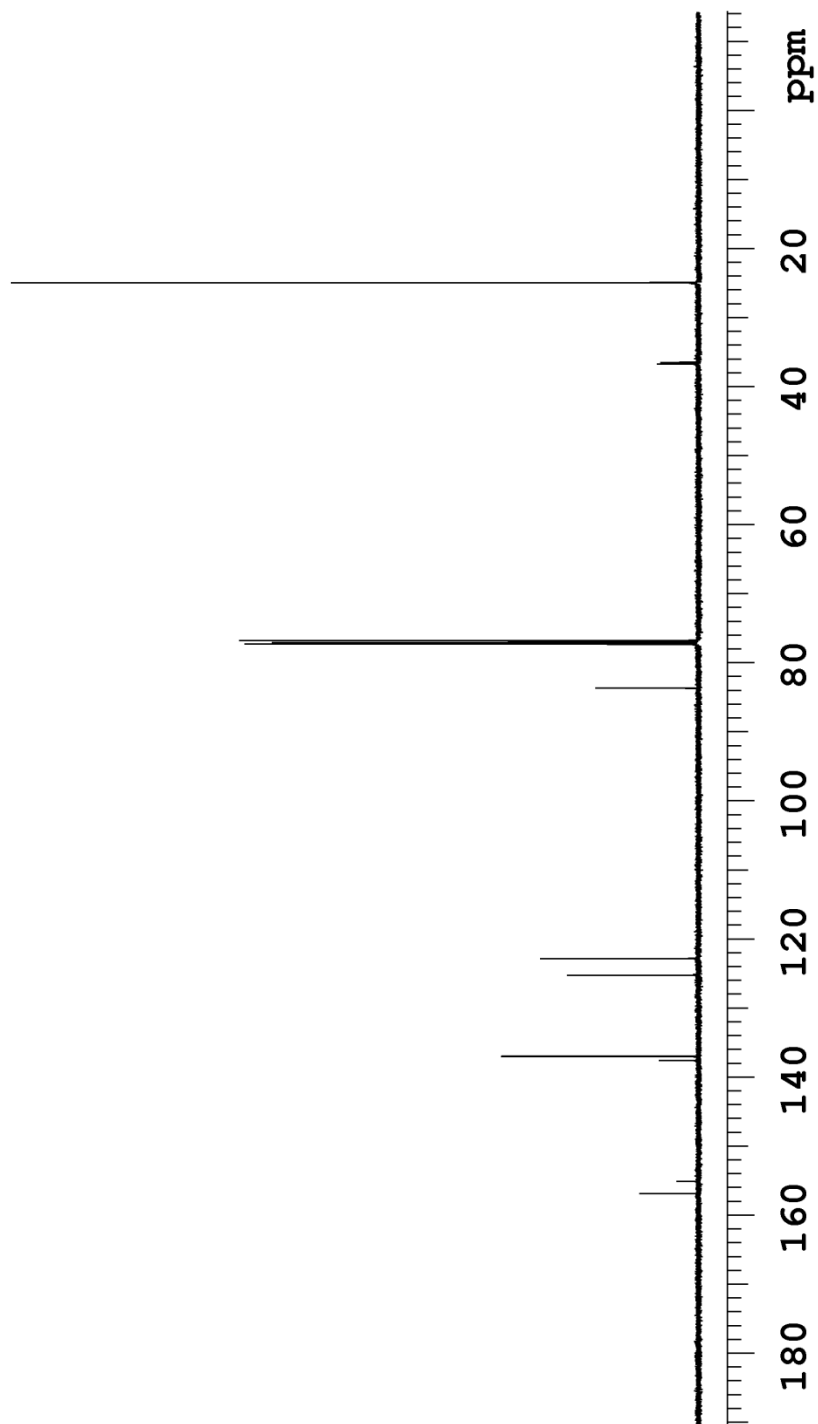

Supplement: ja506229s_si_004.pdf [file ja506229s_si_004.pdf]
